# Supplementary material
Source: publisher figshare collection journal article supplement (https://acs.figshare.com/ndownloader/files/5715192)
Supplement: Supplementary file 1 [file 5715192]

 
# ic991022t.cif

data_cmpd_1
 
_audit_creation_method            SHELXL 

_chemical_formula_moiety          ? 
_chemical_formula_structural      'Cr3(N3C10H8)4Cl2.Cl.2(CH2Cl2).OC4H8'
_chemical_formula_analytical      ? 
_chemical_formula_sum             'C46 H44 Cl7 Cr3 N12 O' 
_chemical_formula_weight          1185.08 
_chemical_compound_source         synthesis
 
loop_ 
 _atom_type_symbol 
 _atom_type_description 
 _atom_type_scat_dispersion_real 
 _atom_type_scat_dispersion_imag 
 _atom_type_scat_source 
 'C'  'C'   0.0033   0.0016 
 'International Tables Vol C Tables 4.2.6.8 and 6.1.1.4' 
 'H'  'H'   0.0000   0.0000 
 'International Tables Vol C Tables 4.2.6.8 and 6.1.1.4' 
 'N'  'N'   0.0061   0.0033 
 'International Tables Vol C Tables 4.2.6.8 and 6.1.1.4' 
 'Cl'  'Cl'   0.1484   0.1585 
 'International Tables Vol C Tables 4.2.6.8 and 6.1.1.4' 
 'Cr'  'Cr'   0.3209   0.6236 
 'International Tables Vol C Tables 4.2.6.8 and 6.1.1.4' 
 'O'  'O'   0.0106   0.0060 
 'International Tables Vol C Tables 4.2.6.8 and 6.1.1.4' 
 
_symmetry_cell_setting            orthorhombic
_symmetry_space_group_name_H-M    Ibca 
loop_ 
 _symmetry_equiv_pos_as_xyz 
 'x, y, z' 
 '-x+1/2, -y, z+1/2' 
 '-x, y+1/2, -z+1/2' 
 'x+1/2, -y+1/2, -z' 
 'x+1/2, y+1/2, z+1/2' 
 '-x+1, -y+1/2, z+1' 
 '-x+1/2, y+1, -z+1' 
 'x+1, -y+1, -z+1/2' 
 '-x, -y, -z' 
 'x-1/2, y, -z-1/2' 
 'x, -y-1/2, z-1/2' 
 '-x-1/2, y-1/2, z' 
 '-x+1/2, -y+1/2, -z+1/2' 
 'x, y+1/2, -z' 
 'x+1/2, -y, z' 
 '-x, y, z+1/2' 
 
_cell_length_a                    16.122(1) 
_cell_length_b                    17.151(1) 
_cell_length_c                    37.508(2) 
_cell_angle_alpha                 90.00 
_cell_angle_beta                  90.00 
_cell_angle_gamma                 90.00 
_cell_volume                      10371(1) 
_cell_formula_units_Z             8 
_cell_measurement_temperature     213(2) 
_cell_measurement_reflns_used     186
_cell_measurement_theta_min       8.2
_cell_measurement_theta_max       20.8
 
_exptl_crystal_description        block
_exptl_crystal_colour             ? 
_exptl_crystal_size_max           0.40 
_exptl_crystal_size_mid           0.40 
_exptl_crystal_size_min           0.10 
_exptl_crystal_density_meas       'not measured'
_exptl_crystal_density_diffrn     1.518 
_exptl_crystal_density_method     ? 
_exptl_crystal_F_000              4824 
_exptl_absorpt_coefficient_mu     1.027 
_exptl_absorpt_correction_type    none
_exptl_absorpt_correction_T_min   ? 
_exptl_absorpt_correction_T_max   ? 
 
_diffrn_ambient_temperature       213(2) 
_diffrn_radiation_wavelength      0.71073 
_diffrn_radiation_type            MoK\a 
_diffrn_radiation_source          'fine-focus sealed tube' 
_diffrn_radiation_monochromator   graphite 
_diffrn_measurement_device        'Nonius FAST'
_diffrn_measurement_method        'Ellipsoid mask fitting'
_diffrn_standards_number          none
_diffrn_standards_interval_count  ? 
_diffrn_standards_interval_time   ? 
_diffrn_standards_decay_%         ? 
_diffrn_reflns_number             21811 
_diffrn_reflns_av_R_equivalents   0.0575 
_diffrn_reflns_av_sigmaI/netI     0.0272 
_diffrn_reflns_limit_h_min        -15 
_diffrn_reflns_limit_h_max        17 
_diffrn_reflns_limit_k_min        -18 
_diffrn_reflns_limit_k_max        17 
_diffrn_reflns_limit_l_min        -40 
_diffrn_reflns_limit_l_max        40 
_diffrn_reflns_theta_min          2.37 
_diffrn_reflns_theta_max          22.57 
_reflns_number_total              3403 
_reflns_number_observed           2859 
_reflns_observed_criterion        >2sigma(I) 
 
_computing_data_collection        MADNES
_computing_cell_refinement        MADNES
_computing_data_reduction         PROCOR
_computing_structure_solution     'SHELXS-86 (Sheldrick, 1990)' 
_computing_structure_refinement   'SHELXL-93 (Sheldrick, 1993)' 
_computing_molecular_graphics     'XP - Siemens, 1996'
_computing_publication_material   'SHELXL-93 (Sheldrick, 1993)' 
 
_refine_special_details 
; 
 Refinement on F^2^ for ALL reflections except for 6 with very negative F^2^ 
 or flagged by the user for potential systematic errors.  Weighted R-factors 
 wR and all goodnesses of fit S are based on F^2^, conventional R-factors R 
 are based on F, with F set to zero for negative F^2^. The observed criterion 
 of F^2^ > 2sigma(F^2^) is used only for calculating _R_factor_obs etc. and is 
 not relevant to the choice of reflections for refinement.  R-factors based 
 on F^2^ are statistically about twice as large as those based on F, and R- 
 factors based on ALL data will be even larger. 
; 
 
_refine_ls_structure_factor_coef  Fsqd  
_refine_ls_matrix_type            full 
_refine_ls_weighting_scheme 
 'calc w=1/[\s^2^(Fo^2^)+(0.1000P)^2^+80.0000P] where P=(Fo^2^+2Fc^2^)/3' 
_atom_sites_solution_primary      direct 
_atom_sites_solution_secondary    difmap 
_atom_sites_solution_hydrogens    geom 
_refine_ls_hydrogen_treatment     noref
_refine_ls_extinction_method      none 
_refine_ls_extinction_coef        ? 
_refine_ls_number_reflns          3397 
_refine_ls_number_parameters      333 
_refine_ls_number_restraints      0 
_refine_ls_R_factor_all           0.0752 
_refine_ls_R_factor_obs           0.0640 
_refine_ls_wR_factor_all          0.1848 
_refine_ls_wR_factor_obs          0.1656 
_refine_ls_goodness_of_fit_all    1.069 
_refine_ls_goodness_of_fit_obs    1.064 
_refine_ls_restrained_S_all       1.079 
_refine_ls_restrained_S_obs       1.064 
_refine_ls_shift/esd_max          0.004 
_refine_ls_shift/esd_mean         0.001 
 
loop_ 
 _atom_site_label 
 _atom_site_type_symbol 
 _atom_site_fract_x 
 _atom_site_fract_y 
 _atom_site_fract_z 
 _atom_site_U_iso_or_equiv 
 _atom_site_thermal_displace_type 
 _atom_site_occupancy 
 _atom_site_calc_flag 
 _atom_site_refinement_flags 
 _atom_site_disorder_group 
Cr1 Cr 0.38796(5) 0.16738(5) 0.34940(2) 0.0267(3) Uani 1 d . . 
Cr2 Cr 0.4890(7) 0.2465(13) 0.35010(4) 0.025(2) Uani 0.50 d P -1 
Cl1 Cl 0.27270(9) 0.08322(8) 0.34828(4) 0.0403(4) Uani 1 d . . 
N1 N 0.3210(2) 0.2632(2) 0.36982(11) 0.0288(10) Uani 1 d . . 
N2 N 0.4468(3) 0.3151(3) 0.38728(11) 0.0293(10) Uani 1 d . . 
N3 N 0.5758(3) 0.3622(2) 0.40114(11) 0.0313(10) Uani 1 d . . 
N4 N 0.3694(3) 0.2055(3) 0.29686(11) 0.0302(10) Uani 1 d . . 
N5 N 0.4457(3) 0.3133(2) 0.31266(10) 0.0278(10) Uani 1 d . . 
N6 N 0.5295(3) 0.4164(2) 0.32891(11) 0.0317(10) Uani 1 d . . 
C1 C 0.2376(3) 0.2696(3) 0.36553(15) 0.0365(13) Uani 1 d . . 
H1 H 0.2092(3) 0.2286(3) 0.35426(15) 0.044 Uiso 1 calc R . 
C2 C 0.1929(4) 0.3327(3) 0.3768(2) 0.0435(15) Uani 1 d . . 
H2 H 0.1351(4) 0.3346(3) 0.3735(2) 0.052 Uiso 1 calc R . 
C3 C 0.2348(4) 0.3937(4) 0.3930(2) 0.050(2) Uani 1 d . . 
H3 H 0.2056(4) 0.4380(4) 0.4009(2) 0.060 Uiso 1 calc R . 
C4 C 0.3191(4) 0.3891(3) 0.3977(2) 0.0424(15) Uani 1 d . . 
H4 H 0.3478(4) 0.4306(3) 0.4084(2) 0.051 Uiso 1 calc R . 
C5 C 0.3619(3) 0.3233(3) 0.38646(14) 0.0307(12) Uani 1 d . . 
C6 C 0.4962(3) 0.3501(3) 0.41213(15) 0.0324(12) Uani 1 d . . 
C7 C 0.4728(4) 0.3670(4) 0.4469(2) 0.045(2) Uani 1 d . . 
H7 H 0.4176(4) 0.3591(4) 0.4541(2) 0.053 Uiso 1 calc R . 
C8 C 0.5299(4) 0.3953(4) 0.4709(2) 0.057(2) Uani 1 d . . 
H8 H 0.5143(4) 0.4065(4) 0.4945(2) 0.068 Uiso 1 calc R . 
C9 C 0.6108(4) 0.4071(4) 0.4598(2) 0.049(2) Uani 1 d . . 
H9 H 0.6508(4) 0.4271(4) 0.4755(2) 0.059 Uiso 1 calc R . 
C10 C 0.6314(4) 0.3893(4) 0.42558(15) 0.0406(14) Uani 1 d . . 
H10 H 0.6868(4) 0.3960(4) 0.41841(15) 0.049 Uiso 1 calc R . 
C11 C 0.3350(3) 0.1596(4) 0.2716(2) 0.0403(14) Uani 1 d . . 
H11 H 0.3116(3) 0.1119(4) 0.2787(2) 0.048 Uiso 1 calc R . 
C12 C 0.3324(4) 0.1790(4) 0.23578(15) 0.0423(15) Uani 1 d . . 
H12 H 0.3074(4) 0.1459(4) 0.21897(15) 0.051 Uiso 1 calc R . 
C13 C 0.3678(4) 0.2486(4) 0.22569(15) 0.046(2) Uani 1 d . . 
H13 H 0.3680(4) 0.2632(4) 0.20153(15) 0.055 Uiso 1 calc R . 
C14 C 0.4026(3) 0.2965(4) 0.25051(15) 0.0398(14) Uani 1 d . . 
H14 H 0.4262(3) 0.3442(4) 0.24352(15) 0.048 Uiso 1 calc R . 
C15 C 0.4032(3) 0.2744(3) 0.28648(14) 0.0300(12) Uani 1 d . . 
C16 C 0.4587(3) 0.3923(3) 0.31231(13) 0.0300(12) Uani 1 d . . 
C17 C 0.4007(4) 0.4472(3) 0.3000(2) 0.0380(14) Uani 1 d . . 
H17 H 0.3516(4) 0.4303(3) 0.2889(2) 0.046 Uiso 1 calc R . 
C18 C 0.4158(4) 0.5251(3) 0.3041(2) 0.045(2) Uani 1 d . . 
H18 H 0.3775(4) 0.5620(3) 0.2956(2) 0.054 Uiso 1 calc R . 
C19 C 0.4875(4) 0.5491(3) 0.3208(2) 0.046(2) Uani 1 d . . 
H19 H 0.4985(4) 0.6025(3) 0.3241(2) 0.055 Uiso 1 calc R . 
C20 C 0.5418(4) 0.4948(3) 0.3325(2) 0.0409(14) Uani 1 d . . 
H20 H 0.5907(4) 0.5118(3) 0.3437(2) 0.049 Uiso 1 calc R . 
Cl2 Cl 0.5000 0.2500 0.14994(5) 0.0425(5) Uani 1 d S . 
C21 C 0.5797(6) 0.1178(6) 0.0919(2) 0.089(3) Uani 1 d . . 
Cl2A Cl 0.4811(9) 0.0872(17) 0.0763(5) 0.177(10) Uani 0.37(3) d P 1 
Cl3A Cl 0.6510(3) 0.0981(10) 0.05783(13) 0.090(3) Uani 0.63(3) d P 1 
Cl2B Cl 0.4925(5) 0.0679(4) 0.0777(2) 0.083(2) Uani 0.63(3) d P 2 
Cl3B Cl 0.6443(10) 0.1498(18) 0.0576(3) 0.109(5) Uani 0.37(3) d P 2 
O1 O 0.3140(12) 0.3874(11) 0.5098(5) 0.123(5) Uiso 0.50 d P -1 
C22 C 0.3325(16) 0.3080(14) 0.5192(6) 0.099(7) Uiso 0.50 d P -1 
C23 C 0.2428(16) 0.2650(13) 0.5124(5) 0.103(7) Uiso 0.50 d P -1 
C24 C 0.2130(18) 0.3187(16) 0.4858(7) 0.110(7) Uiso 0.50 d P -1 
C25 C 0.2410(30) 0.4060(9) 0.4977(13) 0.095(7) Uiso 0.50 d P -1 
 
loop_ 
 _atom_site_aniso_label 
 _atom_site_aniso_U_11 
 _atom_site_aniso_U_22 
 _atom_site_aniso_U_33 
 _atom_site_aniso_U_23 
 _atom_site_aniso_U_13 
 _atom_site_aniso_U_12 
Cr1 0.0246(5) 0.0292(5) 0.0262(5) 0.0009(3) -0.0013(3) -0.0028(4) 
Cr2 0.019(5) 0.034(3) 0.0214(7) 0.0008(12) -0.0008(9) 0.008(4) 
Cl1 0.0361(8) 0.0409(8) 0.0440(8) 0.0015(6) -0.0041(6) -0.0137(6) 
N1 0.021(2) 0.039(3) 0.026(2) 0.002(2) 0.001(2) -0.003(2) 
N2 0.024(2) 0.035(2) 0.028(2) -0.004(2) 0.003(2) -0.005(2) 
N3 0.032(3) 0.034(3) 0.028(2) -0.005(2) 0.001(2) -0.007(2) 
N4 0.025(2) 0.034(3) 0.032(2) -0.001(2) -0.003(2) -0.001(2) 
N5 0.029(2) 0.031(2) 0.023(2) 0.005(2) 0.000(2) -0.001(2) 
N6 0.033(3) 0.029(2) 0.033(2) 0.001(2) 0.006(2) -0.004(2) 
C1 0.032(3) 0.043(3) 0.035(3) 0.004(3) -0.003(2) -0.002(3) 
C2 0.025(3) 0.050(4) 0.056(4) 0.003(3) -0.002(3) 0.004(3) 
C3 0.037(4) 0.050(4) 0.062(4) -0.007(3) 0.011(3) 0.010(3) 
C4 0.040(4) 0.040(3) 0.047(4) -0.014(3) 0.009(3) -0.002(3) 
C5 0.028(3) 0.035(3) 0.029(3) 0.005(2) 0.004(2) -0.007(2) 
C6 0.033(3) 0.031(3) 0.034(3) -0.003(2) 0.002(2) -0.005(2) 
C7 0.034(3) 0.058(4) 0.041(3) -0.015(3) 0.009(3) -0.010(3) 
C8 0.056(4) 0.082(5) 0.033(3) -0.016(3) 0.006(3) -0.009(4) 
C9 0.042(4) 0.074(5) 0.033(3) -0.014(3) -0.007(3) -0.011(3) 
C10 0.036(3) 0.053(4) 0.032(3) -0.004(3) -0.002(3) -0.008(3) 
C11 0.031(3) 0.053(4) 0.037(3) -0.005(3) -0.003(3) 0.001(3) 
C12 0.039(3) 0.060(4) 0.027(3) -0.012(3) -0.005(3) -0.001(3) 
C13 0.040(3) 0.074(4) 0.025(3) 0.001(3) -0.008(3) 0.001(3) 
C14 0.035(3) 0.047(3) 0.038(3) 0.013(3) -0.001(3) 0.001(3) 
C15 0.022(3) 0.035(3) 0.033(3) 0.002(2) 0.000(2) 0.005(2) 
C16 0.034(3) 0.029(3) 0.026(3) 0.004(2) 0.006(2) 0.000(2) 
C17 0.036(3) 0.038(3) 0.041(3) 0.011(3) 0.002(3) 0.008(3) 
C18 0.049(4) 0.037(4) 0.050(4) 0.011(3) 0.008(3) 0.014(3) 
C19 0.063(4) 0.028(3) 0.046(4) 0.004(3) 0.010(3) 0.005(3) 
C20 0.046(3) 0.035(3) 0.041(3) -0.001(3) 0.006(3) -0.004(3) 
Cl2 0.0467(12) 0.0334(11) 0.0475(13) 0.000 0.000 -0.0045(9) 
C21 0.067(5) 0.123(8) 0.077(6) -0.031(5) 0.009(4) -0.006(5) 
Cl2A 0.037(5) 0.324(24) 0.171(14) -0.159(16) 0.029(6) -0.017(8) 
Cl3A 0.049(2) 0.165(9) 0.056(2) 0.012(3) 0.0037(15) 0.005(3) 
Cl2B 0.100(5) 0.083(4) 0.065(3) -0.002(3) 0.005(3) -0.029(3) 
Cl3B 0.084(6) 0.153(15) 0.089(6) 0.008(7) -0.006(4) -0.039(8) 
 
_geom_special_details 
; 
 All esds (except the esd in the dihedral angle between two l.s. planes) 
 are estimated using the full covariance matrix.  The cell esds are taken 
 into account individually in the estimation of esds in distances, angles 
 and torsion angles; correlations between esds in cell parameters are only 
 used when they are defined by crystal symmetry.  An approximate (isotropic) 
 treatment of cell esds is used for estimating esds involving l.s. planes. 
; 
 
loop_ 
 _geom_bond_atom_site_label_1 
 _geom_bond_atom_site_label_2 
 _geom_bond_distance 
 _geom_bond_site_symmetry_2 
 _geom_bond_publ_flag 
Cr1 Cr2 2.120(14) . ? 
Cr2 Cr1 2.474(13) 6_554 ? 
Cr1 N3 2.089(4) 6_554 ? 
Cr1 N4 2.098(4) . ? 
Cr1 N6 2.103(4) 6_554 ? 
Cr1 N1 2.110(4) . ? 
Cr1 Cl1 2.353(2) . ? 
Cr2 N5 1.943(15) . ? 
Cr2 N2 1.95(2) . ? 
Cr2 N5 2.033(15) 6_554 ? 
N1 C1 1.360(7) . ? 
N1 C5 1.373(7) . ? 
N2 C6 1.364(7) . ? 
N2 C5 1.377(7) . ? 
N3 C6 1.363(7) . ? 
N3 C10 1.364(7) . ? 
N4 C11 1.351(7) . ? 
N4 C15 1.359(7) . ? 
N5 C16 1.371(7) . ? 
N5 C15 1.371(7) . ? 
N6 C16 1.364(7) . ? 
N6 C20 1.366(7) . ? 
C1 C2 1.365(8) . ? 
C2 C3 1.388(9) . ? 
C3 C4 1.371(9) . ? 
C4 C5 1.389(8) . ? 
C6 C7 1.387(8) . ? 
C7 C8 1.377(9) . ? 
C8 C9 1.384(9) . ? 
C9 C10 1.359(8) . ? 
C11 C12 1.384(8) . ? 
C12 C13 1.376(9) . ? 
C13 C14 1.362(9) . ? 
C14 C15 1.402(8) . ? 
C16 C17 1.404(8) . ? 
C17 C18 1.366(9) . ? 
C18 C19 1.379(9) . ? 
C19 C20 1.352(9) . ? 
C21 Cl2B 1.730(12) . ? 
C21 Cl3B 1.745(14) . ? 
C21 Cl3A 1.752(10) . ? 
C21 Cl2A 1.77(2) . ? 
O1 C25 1.30(6) . ? 
O1 C22 1.44(3) . ? 
C22 C23 1.64(3) . ? 
C23 C24 1.44(3) . ? 
C24 C25 1.63(4) . ? 
 
loop_ 
 _geom_angle_atom_site_label_1 
 _geom_angle_atom_site_label_2 
 _geom_angle_atom_site_label_3 
 _geom_angle 
 _geom_angle_site_symmetry_1 
 _geom_angle_site_symmetry_3 
 _geom_angle_publ_flag 
Cr1 Cr2 Cr1 176.6(9) . 6_554 ? 
N3 Cr1 N4 171.2(2) 6_554 . ? 
N3 Cr1 N6 89.8(2) 6_554 6_554 ? 
N4 Cr1 N6 87.7(2) . 6_554 ? 
N3 Cr1 N1 89.7(2) 6_554 . ? 
N4 Cr1 N1 91.4(2) . . ? 
N6 Cr1 N1 171.1(2) 6_554 . ? 
N3 Cr1 Cr2 85.9(2) 6_554 . ? 
N4 Cr1 Cr2 85.5(2) . . ? 
N6 Cr1 Cr2 87.4(5) 6_554 . ? 
N1 Cr1 Cr2 83.7(5) . . ? 
N3 Cr1 Cl1 95.09(12) 6_554 . ? 
N4 Cr1 Cl1 93.53(12) . . ? 
N6 Cr1 Cl1 94.26(12) 6_554 . ? 
N1 Cr1 Cl1 94.60(12) . . ? 
Cr2 Cr1 Cl1 178.0(5) . . ? 
N5 Cr2 N2 92.0(9) . . ? 
N5 Cr2 N2 170.3(7) . 6_554 ? 
N2 Cr2 N2 90.0(3) . 6_554 ? 
N5 Cr2 N5 89.1(2) . 6_554 ? 
N2 Cr2 N5 168.6(7) . 6_554 ? 
N2 Cr2 N5 87.0(8) 6_554 6_554 ? 
N5 Cr2 Cr1 95.3(4) . . ? 
N2 Cr2 Cr1 97.3(4) . . ? 
N2 Cr2 Cr1 93.9(7) 6_554 . ? 
N5 Cr2 Cr1 93.8(7) 6_554 . ? 
N5 Cr2 Cr1 85.9(6) . 6_554 ? 
N2 Cr2 Cr1 85.8(6) . 6_554 ? 
N2 Cr2 Cr1 84.8(4) 6_554 6_554 ? 
N5 Cr2 Cr1 83.0(4) 6_554 6_554 ? 
C1 N1 C5 117.9(5) . . ? 
C1 N1 Cr1 121.8(4) . . ? 
C5 N1 Cr1 120.3(3) . . ? 
C6 N2 C5 123.4(4) . . ? 
C6 N2 Cr2 123.5(5) . . ? 
C5 N2 Cr2 113.1(4) . . ? 
C6 N3 C10 117.9(4) . . ? 
C6 N3 Cr1 120.5(3) . 6_554 ? 
C10 N3 Cr1 121.5(4) . 6_554 ? 
C11 N4 C15 118.1(5) . . ? 
C11 N4 Cr1 122.4(4) . . ? 
C15 N4 Cr1 118.9(3) . . ? 
C16 N5 C15 123.5(4) . . ? 
C16 N5 Cr2 122.4(6) . . ? 
C15 N5 Cr2 114.2(6) . . ? 
C16 N6 C20 117.6(5) . . ? 
C16 N6 Cr1 119.3(3) . 6_554 ? 
C20 N6 Cr1 123.0(4) . 6_554 ? 
N1 C1 C2 123.4(5) . . ? 
C1 C2 C3 118.5(5) . . ? 
C4 C3 C2 119.6(6) . . ? 
C3 C4 C5 120.1(6) . . ? 
N1 C5 N2 114.3(4) . . ? 
N1 C5 C4 120.6(5) . . ? 
N2 C5 C4 124.8(5) . . ? 
N3 C6 N2 114.1(4) . . ? 
N3 C6 C7 120.5(5) . . ? 
N2 C6 C7 125.1(5) . . ? 
C8 C7 C6 120.5(5) . . ? 
C7 C8 C9 118.9(6) . . ? 
C10 C9 C8 118.8(6) . . ? 
C9 C10 N3 123.4(5) . . ? 
N4 C11 C12 123.6(6) . . ? 
C13 C12 C11 117.6(5) . . ? 
C14 C13 C12 120.4(5) . . ? 
C13 C14 C15 119.9(6) . . ? 
N4 C15 N5 114.8(4) . . ? 
N4 C15 C14 120.5(5) . . ? 
N5 C15 C14 124.1(5) . . ? 
N6 C16 N5 115.0(4) . . ? 
N6 C16 C17 120.3(5) . . ? 
N5 C16 C17 124.3(5) . . ? 
C18 C17 C16 120.0(6) . . ? 
C17 C18 C19 119.5(5) . . ? 
C20 C19 C18 119.0(6) . . ? 
C19 C20 N6 123.6(6) . . ? 
Cl2B C21 Cl3B 114.4(7) . . ? 
Cl3A C21 Cl2A 106.9(7) . . ? 
C25 O1 C22 120.4(22) . . ? 
O1 C22 C23 101.8(19) . . ? 
C24 C23 C22 96.5(21) . . ? 
C23 C24 C25 107.8(25) . . ? 
O1 C25 C24 97.0(22) . . ? 
 
loop_ 
 _geom_torsion_atom_site_label_1 
 _geom_torsion_atom_site_label_2 
 _geom_torsion_atom_site_label_3 
 _geom_torsion_atom_site_label_4 
 _geom_torsion 
 _geom_torsion_site_symmetry_1 
 _geom_torsion_site_symmetry_2 
 _geom_torsion_site_symmetry_3 
 _geom_torsion_site_symmetry_4 
 _geom_torsion_publ_flag 
 N1 Cr1 Cr1 N3 47.3(2) . . 6_554 . ? 
 N4 Cr1 Cr1 N6 49.0(2) . . 6_554 . ? 
 
_refine_diff_density_max    1.540 
_refine_diff_density_min   -0.429 
_refine_diff_density_rms    0.113 

#===END
 
data_cmpd_2
 
_audit_creation_method            SHELXL 

_chemical_formula_moiety          ? 
_chemical_formula_structural      '[Cr3(N3C10H8)4Cl2][AlCl4].CH2Cl2'
_chemical_formula_analytical      ? 
_chemical_formula_sum             'C41 H34 Al Cl8 Cr3 N12' 
_chemical_formula_weight          1161.38 
_chemical_melting_point           ? 
_chemical_compound_source         synthesis
 
loop_ 
 _atom_type_symbol 
 _atom_type_description 
 _atom_type_scat_dispersion_real 
 _atom_type_scat_dispersion_imag 
 _atom_type_scat_source 
 'C'  'C'   0.0033   0.0016 
 'International Tables Vol C Tables 4.2.6.8 and 6.1.1.4' 
 'H'  'H'   0.0000   0.0000 
 'International Tables Vol C Tables 4.2.6.8 and 6.1.1.4' 
 'N'  'N'   0.0061   0.0033 
 'International Tables Vol C Tables 4.2.6.8 and 6.1.1.4' 
 'Al'  'Al'   0.0645   0.0514 
 'International Tables Vol C Tables 4.2.6.8 and 6.1.1.4' 
 'Cl'  'Cl'   0.1484   0.1585 
 'International Tables Vol C Tables 4.2.6.8 and 6.1.1.4' 
 'Cr'  'Cr'   0.3209   0.6236 
 'International Tables Vol C Tables 4.2.6.8 and 6.1.1.4' 
 
_symmetry_cell_setting            monoclinic
_symmetry_space_group_name_H-M    'P2(1)/n'
 
loop_ 
 _symmetry_equiv_pos_as_xyz 
 'x, y, z' 
 '-x+1/2, y+1/2, -z+1/2' 
 '-x, -y, -z' 
 'x-1/2, -y-1/2, z-1/2' 
 
_cell_length_a                    11.657(2) 
_cell_length_b                    28.350(6) 
_cell_length_c                    15.019(3) 
_cell_angle_alpha                 90.00 
_cell_angle_beta                  104.41(3) 
_cell_angle_gamma                 90.00 
_cell_volume                      4807.4(17) 
_cell_formula_units_Z             4 
_cell_measurement_temperature     213(2) 
_cell_measurement_reflns_used     250
_cell_measurement_theta_min       8.4
_cell_measurement_theta_max       18.2
 
_exptl_crystal_description        block
_exptl_crystal_colour             black
_exptl_crystal_size_max           0.50 
_exptl_crystal_size_mid           0.40 
_exptl_crystal_size_min           0.40 
_exptl_crystal_density_meas       'not measured'
_exptl_crystal_density_diffrn     1.605 
_exptl_crystal_density_method     ? 
_exptl_crystal_F_000              2340 
_exptl_absorpt_coefficient_mu     1.175 
_exptl_absorpt_correction_type    none
_exptl_absorpt_correction_T_min   ? 
_exptl_absorpt_correction_T_max   ? 
 
 
_diffrn_ambient_temperature       213(2) 
_diffrn_radiation_wavelength      0.71073 
_diffrn_radiation_type            MoK\a 
_diffrn_radiation_source          'fine-focus sealed tube' 
_diffrn_radiation_monochromator   graphite 
_diffrn_measurement_device        'Nonius FAST'
_diffrn_measurement_method        'Ellipsoid mask-fitting'
_diffrn_standards_number          'None (area detector)'
_diffrn_standards_interval_count  ? 
_diffrn_standards_interval_time   ? 
_diffrn_standards_decay_%         ? 
_diffrn_reflns_number             13713 
_diffrn_reflns_av_R_equivalents   0.0595 
_diffrn_reflns_av_sigmaI/netI     0.0489 
_diffrn_reflns_limit_h_min        -11 
_diffrn_reflns_limit_h_max        9 
_diffrn_reflns_limit_k_min        -29 
_diffrn_reflns_limit_k_max        30 
_diffrn_reflns_limit_l_min        -13 
_diffrn_reflns_limit_l_max        16 
_diffrn_reflns_theta_min          2.31 
_diffrn_reflns_theta_max          22.57 
_reflns_number_total              5806 
_reflns_number_observed           4690 
_reflns_observed_criterion        >2sigma(I) 
 
_computing_data_collection        MADNES
_computing_cell_refinement        MADNES
_computing_data_reduction         PROCOR
_computing_structure_solution     'SHELXS-86 (Sheldrick, 1990)' 
_computing_structure_refinement   'SHELXL-93 (Sheldrick, 1993)' 
_computing_molecular_graphics     'XP (Siemens, 1996)'
_computing_publication_material   'SHELXL-93 (Sheldrick, 1993)' 
 
_refine_special_details 
; 
 Refinement on F^2^ for ALL reflections except for 12 with very negative F^2^ 
 or flagged by the user for potential systematic errors.  Weighted R-factors 
 wR and all goodnesses of fit S are based on F^2^, conventional R-factors R 
 are based on F, with F set to zero for negative F^2^. The observed criterion 
 of F^2^ > 2sigma(F^2^) is used only for calculating _R_factor_obs etc. and is 
 not relevant to the choice of reflections for refinement.  R-factors based 
 on F^2^ are statistically about twice as large as those based on F, and R- 
 factors based on ALL data will be even larger. 
; 
 
_refine_ls_structure_factor_coef  Fsqd  
_refine_ls_matrix_type            full 
_refine_ls_weighting_scheme 
 'calc w=1/[\s^2^(Fo^2^)+(0.0390P)^2^+22.0000P] where P=(Fo^2^+2Fc^2^)/3' 
_atom_sites_solution_primary      direct 
_atom_sites_solution_secondary    difmap 
_atom_sites_solution_hydrogens    geom 
_refine_ls_hydrogen_treatment     noref
_refine_ls_extinction_method      none 
_refine_ls_extinction_coef        ? 
_refine_ls_number_reflns          5794 
_refine_ls_number_parameters      604 
_refine_ls_number_restraints      0 
_refine_ls_R_factor_all           0.0706 
_refine_ls_R_factor_obs           0.0535 
_refine_ls_wR_factor_all          0.1341 
_refine_ls_wR_factor_obs          0.1166 
_refine_ls_goodness_of_fit_all    1.117 
_refine_ls_goodness_of_fit_obs    1.109 
_refine_ls_restrained_S_all       1.132 
_refine_ls_restrained_S_obs       1.109 
_refine_ls_shift/esd_max          0.015 
_refine_ls_shift/esd_mean         0.001 
 
loop_ 
 _atom_site_label 
 _atom_site_type_symbol 
 _atom_site_fract_x 
 _atom_site_fract_y 
 _atom_site_fract_z 
 _atom_site_U_iso_or_equiv 
 _atom_site_thermal_displace_type 
 _atom_site_occupancy 
 _atom_site_calc_flag 
 _atom_site_refinement_flags 
 _atom_site_disorder_group 
Cr1 Cr 0.94274(8) 0.17229(3) 0.85190(6) 0.0178(2) Uani 1 d . . 
Cr2 Cr 0.78132(8) 0.15071(3) 0.85992(6) 0.0179(2) Uani 1 d . . 
Cr3 Cr 0.57382(8) 0.12419(3) 0.86571(6) 0.0213(2) Uani 1 d . . 
Cl1 Cl 1.13677(13) 0.20030(5) 0.84090(10) 0.0261(4) Uani 1 d . . 
Cl2 Cl 0.38935(14) 0.10021(6) 0.87069(11) 0.0349(4) Uani 1 d . . 
N1 N 0.8652(4) 0.1949(2) 0.7165(3) 0.0209(11) Uani 1 d . . 
N2 N 0.6899(4) 0.1922(2) 0.7586(3) 0.0204(11) Uani 1 d . . 
N3 N 0.5214(4) 0.1908(2) 0.8136(3) 0.0236(11) Uani 1 d . . 
N4 N 0.9019(4) 0.2391(2) 0.8993(3) 0.0224(11) Uani 1 d . . 
N5 N 0.7589(4) 0.19977(15) 0.9503(3) 0.0194(11) Uani 1 d . . 
N6 N 0.6125(4) 0.1566(2) 0.9939(3) 0.0227(11) Uani 1 d . . 
N7 N 1.0127(4) 0.1453(2) 0.9859(3) 0.0208(11) Uani 1 d . . 
N8 N 0.8366(4) 0.1050(2) 0.9631(3) 0.0189(11) Uani 1 d . . 
N9 N 0.6612(4) 0.0628(2) 0.9213(3) 0.0219(11) Uani 1 d . . 
N10 N 0.9694(4) 0.1053(2) 0.8004(3) 0.0199(11) Uani 1 d . . 
N11 N 0.7675(4) 0.0983(2) 0.7685(3) 0.0226(11) Uani 1 d . . 
N12 N 0.5640(4) 0.0974(2) 0.7349(3) 0.0251(12) Uani 1 d . . 
C1 C 0.9281(5) 0.2008(2) 0.6523(4) 0.0257(14) Uani 1 d . . 
H1 H 1.0100(5) 0.1947(2) 0.6688(4) 0.031 Uiso 1 calc R . 
C2 C 0.8769(6) 0.2152(2) 0.5649(4) 0.033(2) Uani 1 d . . 
H2 H 0.9235(6) 0.2201(2) 0.5229(4) 0.040 Uiso 1 calc R . 
C3 C 0.7562(6) 0.2226(2) 0.5384(4) 0.035(2) Uani 1 d . . 
H3 H 0.7195(6) 0.2316(2) 0.4777(4) 0.042 Uiso 1 calc R . 
C4 C 0.6907(6) 0.2167(2) 0.6017(4) 0.033(2) Uani 1 d . . 
H4 H 0.6086(6) 0.2223(2) 0.5848(4) 0.040 Uiso 1 calc R . 
C5 C 0.7458(5) 0.2025(2) 0.6915(4) 0.0204(13) Uani 1 d . . 
C6 C 0.5889(5) 0.2147(2) 0.7669(4) 0.0248(14) Uani 1 d . . 
C7 C 0.5596(5) 0.2615(2) 0.7380(4) 0.0267(14) Uani 1 d . . 
H7 H 0.6037(5) 0.2774(2) 0.7026(4) 0.032 Uiso 1 calc R . 
C8 C 0.4670(6) 0.2837(2) 0.7613(4) 0.032(2) Uani 1 d . . 
H8 H 0.4484(6) 0.3152(2) 0.7439(4) 0.039 Uiso 1 calc R . 
C9 C 0.4014(6) 0.2591(2) 0.8109(5) 0.036(2) Uani 1 d . . 
H9 H 0.3373(6) 0.2737(2) 0.8275(5) 0.043 Uiso 1 calc R . 
C10 C 0.4305(5) 0.2136(2) 0.8355(4) 0.031(2) Uani 1 d . . 
H10 H 0.3851(5) 0.1973(2) 0.8692(4) 0.037 Uiso 1 calc R . 
C11 C 0.9525(6) 0.2795(2) 0.8800(4) 0.0308(15) Uani 1 d . . 
H11 H 1.0158(6) 0.2772(2) 0.8518(4) 0.037 Uiso 1 calc R . 
C12 C 0.9175(6) 0.3233(2) 0.8989(5) 0.039(2) Uani 1 d . . 
H12 H 0.9566(6) 0.3504(2) 0.8856(5) 0.046 Uiso 1 calc R . 
C13 C 0.8231(6) 0.3267(2) 0.9380(5) 0.043(2) Uani 1 d . . 
H13 H 0.7959(6) 0.3565(2) 0.9509(5) 0.052 Uiso 1 calc R . 
C14 C 0.7688(6) 0.2872(2) 0.9581(5) 0.035(2) Uani 1 d . . 
H14 H 0.7037(6) 0.2897(2) 0.9843(5) 0.042 Uiso 1 calc R . 
C15 C 0.8096(5) 0.2423(2) 0.9399(4) 0.0199(13) Uani 1 d . . 
C16 C 0.6918(5) 0.1929(2) 1.0136(4) 0.0213(13) Uani 1 d . . 
C17 C 0.7050(5) 0.2185(2) 1.0945(4) 0.0273(14) Uani 1 d . . 
H17 H 0.7609(5) 0.2430(2) 1.1082(4) 0.033 Uiso 1 calc R . 
C18 C 0.6368(6) 0.2082(2) 1.1547(4) 0.034(2) Uani 1 d . . 
H18 H 0.6432(6) 0.2263(2) 1.2082(4) 0.041 Uiso 1 calc R . 
C19 C 0.5585(6) 0.1706(2) 1.1351(4) 0.034(2) Uani 1 d . . 
H19 H 0.5124(6) 0.1623(2) 1.1759(4) 0.041 Uiso 1 calc R . 
C20 C 0.5496(6) 0.1461(2) 1.0562(4) 0.034(2) Uani 1 d . . 
H20 H 0.4969(6) 0.1205(2) 1.0439(4) 0.040 Uiso 1 calc R . 
C21 C 1.1213(5) 0.1567(2) 1.0382(4) 0.0271(14) Uani 1 d . . 
H21 H 1.1674(5) 0.1783(2) 1.0147(4) 0.033 Uiso 1 calc R . 
C22 C 1.1669(6) 0.1381(2) 1.1233(4) 0.035(2) Uani 1 d . . 
H22 H 1.2444(6) 0.1457(2) 1.1562(4) 0.042 Uiso 1 calc R . 
C23 C 1.0979(6) 0.1080(2) 1.1613(4) 0.034(2) Uani 1 d . . 
H23 H 1.1267(6) 0.0961(2) 1.2211(4) 0.041 Uiso 1 calc R . 
C24 C 0.9873(6) 0.0960(2) 1.1104(4) 0.030(2) Uani 1 d . . 
H24 H 0.9393(6) 0.0757(2) 1.1351(4) 0.036 Uiso 1 calc R . 
C25 C 0.9456(5) 0.1140(2) 1.0209(4) 0.0245(14) Uani 1 d . . 
C26 C 0.7783(5) 0.0621(2) 0.9635(4) 0.0214(14) Uani 1 d . . 
C27 C 0.8348(6) 0.0197(2) 0.9952(4) 0.0301(15) Uani 1 d . . 
H27 H 0.9162(6) 0.0192(2) 1.0240(4) 0.036 Uiso 1 calc R . 
C28 C 0.7702(6) -0.0214(2) 0.9839(4) 0.037(2) Uani 1 d . . 
H28 H 0.8073(6) -0.0500(2) 1.0059(4) 0.044 Uiso 1 calc R . 
C29 C 0.6518(6) -0.0208(2) 0.9407(4) 0.036(2) Uani 1 d . . 
H29 H 0.6072(6) -0.0488(2) 0.9322(4) 0.044 Uiso 1 calc R . 
C30 C 0.6004(6) 0.0212(2) 0.9106(4) 0.032(2) Uani 1 d . . 
H30 H 0.5192(6) 0.0217(2) 0.8811(4) 0.039 Uiso 1 calc R . 
C31 C 1.0779(6) 0.0881(2) 0.8038(4) 0.0287(15) Uani 1 d . . 
H31 H 1.1437(6) 0.1074(2) 0.8289(4) 0.034 Uiso 1 calc R . 
C32 C 1.0980(6) 0.0449(2) 0.7733(4) 0.032(2) Uani 1 d . . 
H32 H 1.1754(6) 0.0347(2) 0.7756(4) 0.038 Uiso 1 calc R . 
C33 C 1.0004(6) 0.0157(2) 0.7382(5) 0.038(2) Uani 1 d . . 
H33 H 1.0111(6) -0.0150(2) 0.7179(5) 0.046 Uiso 1 calc R . 
C34 C 0.8895(6) 0.0326(2) 0.7341(4) 0.032(2) Uani 1 d . . 
H34 H 0.8233(6) 0.0134(2) 0.7099(4) 0.038 Uiso 1 calc R . 
C35 C 0.8727(5) 0.0778(2) 0.7652(4) 0.0232(14) Uani 1 d . . 
C36 C 0.6626(5) 0.0873(2) 0.7062(4) 0.0241(14) Uani 1 d . . 
C37 C 0.6551(6) 0.0709(2) 0.6175(4) 0.033(2) Uani 1 d . . 
H37 H 0.7245(6) 0.0650(2) 0.5982(4) 0.039 Uiso 1 calc R . 
C38 C 0.5470(6) 0.0636(2) 0.5588(4) 0.037(2) Uani 1 d . . 
H38 H 0.5416(6) 0.0521(2) 0.4992(4) 0.045 Uiso 1 calc R . 
C39 C 0.4452(6) 0.0730(2) 0.5871(4) 0.035(2) Uani 1 d . . 
H39 H 0.3702(6) 0.0676(2) 0.5474(4) 0.042 Uiso 1 calc R . 
C40 C 0.4555(6) 0.0902(2) 0.6737(4) 0.033(2) Uani 1 d . . 
H40 H 0.3863(6) 0.0974(2) 0.6924(4) 0.040 Uiso 1 calc R . 
Al1 Al 0.3248(2) -0.06730(6) 0.68240(13) 0.0323(5) Uani 1 d . . 
Cl3 Cl 0.2817(2) -0.13688(6) 0.6302(2) 0.0619(6) Uani 1 d . . 
Cl4 Cl 0.2845(2) -0.05752(8) 0.81196(15) 0.0696(7) Uani 1 d . . 
Cl5 Cl 0.5104(2) -0.05610(7) 0.70067(13) 0.0564(5) Uani 1 d . . 
Cl6 Cl 0.2242(2) -0.01883(6) 0.58321(14) 0.0528(5) Uani 1 d . . 
C41 C 0.5305(8) 0.4071(3) 1.0127(6) 0.067(2) Uani 1 d . . 
Cl7 Cl 0.6387(2) 0.37419(8) 1.09205(14) 0.0608(6) Uani 1 d . . 
Cl8A Cl 0.5515(23) 0.4019(11) 0.8988(13) 0.077(6) Uani 0.50 d P . 
Cl8B Cl 0.5411(39) 0.3917(21) 0.9046(30) 0.084(13) Uani 0.25 d P . 
Cl8C Cl 0.5861(24) 0.4229(6) 0.9214(13) 0.090(7) Uani 0.25 d P . 
 
loop_ 
 _atom_site_aniso_label 
 _atom_site_aniso_U_11 
 _atom_site_aniso_U_22 
 _atom_site_aniso_U_33 
 _atom_site_aniso_U_23 
 _atom_site_aniso_U_13 
 _atom_site_aniso_U_12 
Cr1 0.0105(6) 0.0195(5) 0.0223(5) -0.0006(4) 0.0021(4) -0.0003(4) 
Cr2 0.0123(6) 0.0179(5) 0.0222(5) 0.0014(4) 0.0018(4) 0.0009(4) 
Cr3 0.0109(6) 0.0225(5) 0.0297(5) 0.0030(4) 0.0034(4) -0.0018(4) 
Cl1 0.0129(9) 0.0310(8) 0.0340(8) -0.0001(6) 0.0054(6) -0.0025(6) 
Cl2 0.0139(10) 0.0410(9) 0.0500(10) 0.0033(8) 0.0084(7) -0.0077(7) 
N1 0.014(3) 0.021(3) 0.026(3) 0.003(2) 0.001(2) -0.001(2) 
N2 0.004(3) 0.028(3) 0.027(3) 0.003(2) 0.000(2) 0.001(2) 
N3 0.010(3) 0.028(3) 0.030(3) 0.000(2) 0.000(2) 0.000(2) 
N4 0.011(3) 0.026(3) 0.030(3) -0.003(2) 0.004(2) -0.004(2) 
N5 0.012(3) 0.020(3) 0.026(3) -0.002(2) 0.005(2) 0.002(2) 
N6 0.018(3) 0.024(3) 0.026(3) 0.009(2) 0.005(2) 0.008(2) 
N7 0.013(3) 0.025(3) 0.024(3) 0.001(2) 0.003(2) -0.003(2) 
N8 0.010(3) 0.023(3) 0.022(3) 0.004(2) 0.001(2) 0.000(2) 
N9 0.016(3) 0.023(3) 0.026(3) 0.003(2) 0.003(2) -0.002(2) 
N10 0.012(3) 0.025(3) 0.023(3) 0.002(2) 0.005(2) 0.005(2) 
N11 0.014(3) 0.025(3) 0.027(3) -0.002(2) 0.001(2) 0.004(2) 
N12 0.013(3) 0.024(3) 0.035(3) -0.002(2) -0.001(2) -0.004(2) 
C1 0.014(4) 0.034(3) 0.032(4) -0.004(3) 0.010(3) -0.006(3) 
C2 0.034(5) 0.046(4) 0.021(3) 0.005(3) 0.009(3) 0.000(3) 
C3 0.044(5) 0.038(4) 0.018(3) 0.003(3) 0.000(3) 0.009(3) 
C4 0.023(4) 0.035(4) 0.037(4) 0.008(3) -0.001(3) 0.005(3) 
C5 0.013(4) 0.018(3) 0.027(3) 0.000(2) 0.001(3) -0.001(2) 
C6 0.010(4) 0.030(3) 0.027(3) 0.004(3) -0.008(3) -0.004(3) 
C7 0.016(4) 0.029(3) 0.033(4) 0.009(3) 0.002(3) 0.005(3) 
C8 0.033(4) 0.020(3) 0.044(4) 0.005(3) 0.010(3) 0.008(3) 
C9 0.016(4) 0.043(4) 0.048(4) 0.003(3) 0.007(3) 0.011(3) 
C10 0.004(4) 0.038(4) 0.051(4) 0.006(3) 0.008(3) 0.005(3) 
C11 0.024(4) 0.029(4) 0.041(4) 0.000(3) 0.011(3) -0.010(3) 
C12 0.033(5) 0.021(3) 0.063(5) 0.003(3) 0.014(4) -0.007(3) 
C13 0.037(5) 0.026(4) 0.069(5) -0.004(3) 0.020(4) -0.003(3) 
C14 0.025(4) 0.029(4) 0.055(4) -0.007(3) 0.016(3) 0.001(3) 
C15 0.010(4) 0.024(3) 0.021(3) -0.002(2) -0.004(2) 0.003(2) 
C16 0.007(4) 0.028(3) 0.027(3) 0.002(3) 0.000(3) 0.006(2) 
C17 0.026(4) 0.034(4) 0.020(3) -0.002(3) 0.003(3) 0.002(3) 
C18 0.036(5) 0.043(4) 0.024(3) -0.005(3) 0.007(3) 0.009(3) 
C19 0.027(4) 0.048(4) 0.031(4) 0.007(3) 0.012(3) 0.013(3) 
C20 0.026(4) 0.037(4) 0.040(4) 0.008(3) 0.011(3) 0.004(3) 
C21 0.024(4) 0.025(3) 0.031(4) -0.002(3) 0.004(3) -0.004(3) 
C22 0.025(4) 0.043(4) 0.030(4) 0.000(3) -0.006(3) 0.000(3) 
C23 0.033(5) 0.038(4) 0.025(3) 0.006(3) -0.003(3) 0.001(3) 
C24 0.031(4) 0.038(4) 0.023(3) 0.003(3) 0.011(3) -0.006(3) 
C25 0.016(4) 0.030(3) 0.026(3) -0.004(3) 0.001(3) 0.006(3) 
C26 0.024(4) 0.021(3) 0.021(3) 0.000(2) 0.009(3) 0.001(3) 
C27 0.027(4) 0.027(3) 0.034(4) 0.006(3) 0.003(3) 0.003(3) 
C28 0.056(6) 0.015(3) 0.035(4) 0.005(3) 0.005(4) 0.002(3) 
C29 0.043(5) 0.027(4) 0.034(4) 0.001(3) 0.000(3) -0.010(3) 
C30 0.028(4) 0.028(4) 0.040(4) 0.003(3) 0.007(3) -0.010(3) 
C31 0.018(4) 0.033(4) 0.035(4) 0.004(3) 0.008(3) 0.004(3) 
C32 0.020(4) 0.031(4) 0.044(4) -0.001(3) 0.009(3) 0.007(3) 
C33 0.041(5) 0.024(3) 0.049(4) -0.008(3) 0.009(3) 0.008(3) 
C34 0.025(4) 0.026(3) 0.040(4) -0.007(3) 0.000(3) -0.002(3) 
C35 0.018(4) 0.026(3) 0.020(3) 0.003(3) -0.004(3) 0.002(3) 
C36 0.013(4) 0.025(3) 0.031(4) -0.003(3) 0.001(3) -0.007(2) 
C37 0.022(4) 0.044(4) 0.028(4) -0.003(3) 0.000(3) 0.001(3) 
C38 0.033(5) 0.046(4) 0.031(4) -0.007(3) 0.002(3) -0.013(3) 
C39 0.026(5) 0.041(4) 0.029(4) 0.001(3) -0.012(3) -0.014(3) 
C40 0.018(4) 0.037(4) 0.042(4) 0.011(3) 0.004(3) -0.004(3) 
Al1 0.0334(13) 0.0273(10) 0.0385(11) -0.0020(8) 0.0135(9) 0.0052(8) 
Cl3 0.0603(15) 0.0358(10) 0.086(2) -0.0090(10) 0.0101(11) -0.0033(9) 
Cl4 0.093(2) 0.0686(14) 0.0618(13) 0.0160(11) 0.0468(12) 0.0419(12) 
Cl5 0.0402(13) 0.0734(14) 0.0526(12) -0.0146(10) 0.0055(9) -0.0041(9) 
Cl6 0.0469(13) 0.0448(11) 0.0640(12) 0.0112(9) 0.0088(9) 0.0011(9) 
C41 0.065(6) 0.080(6) 0.062(6) 0.004(5) 0.024(5) 0.028(5) 
Cl7 0.0511(14) 0.0766(14) 0.0579(12) -0.0002(11) 0.0197(10) -0.0054(10) 
Cl8A 0.115(14) 0.073(12) 0.051(7) 0.023(7) 0.035(8) 0.047(9) 
Cl8B 0.058(14) 0.098(29) 0.089(22) 0.001(16) 0.005(13) 0.020(11) 
Cl8C 0.138(17) 0.064(12) 0.056(9) 0.006(7) 0.003(8) 0.046(11) 
 
_geom_special_details 
; 
 All esds (except the esd in the dihedral angle between two l.s. planes) 
 are estimated using the full covariance matrix.  The cell esds are taken 
 into account individually in the estimation of esds in distances, angles 
 and torsion angles; correlations between esds in cell parameters are only 
 used when they are defined by crystal symmetry.  An approximate (isotropic) 
 treatment of cell esds is used for estimating esds involving l.s. planes. 
; 
 
loop_ 
 _geom_bond_atom_site_label_1 
 _geom_bond_atom_site_label_2 
 _geom_bond_distance 
 _geom_bond_site_symmetry_2 
 _geom_bond_publ_flag 
Cr1 Cr2 2.0105(13) . ? 
Cr1 N10 2.103(4) . ? 
Cr1 N1 2.109(5) . ? 
Cr1 N7 2.117(5) . ? 
Cr1 N4 2.119(5) . ? 
Cr1 Cl1 2.441(2) . ? 
Cr2 N8 1.999(4) . ? 
Cr2 N11 2.002(5) . ? 
Cr2 N5 2.005(4) . ? 
Cr2 N2 2.007(4) . ? 
Cr2 Cr3 2.5550(13) . ? 
Cr3 N3 2.078(5) . ? 
Cr3 N6 2.079(5) . ? 
Cr3 N12 2.082(5) . ? 
Cr3 N9 2.083(5) . ? 
Cr3 Cl2 2.274(2) . ? 
N1 C1 1.359(7) . ? 
N1 C5 1.366(7) . ? 
N2 C5 1.362(7) . ? 
N2 C6 1.372(7) . ? 
N3 C10 1.350(7) . ? 
N3 C6 1.358(7) . ? 
N4 C11 1.353(7) . ? 
N4 C15 1.365(7) . ? 
N5 C15 1.368(7) . ? 
N5 C16 1.386(7) . ? 
N6 C20 1.357(8) . ? 
N6 C16 1.366(7) . ? 
N7 C21 1.352(8) . ? 
N7 C25 1.371(7) . ? 
N8 C25 1.372(7) . ? 
N8 C26 1.395(7) . ? 
N9 C26 1.355(8) . ? 
N9 C30 1.364(7) . ? 
N10 C31 1.345(7) . ? 
N10 C35 1.365(7) . ? 
N11 C35 1.369(7) . ? 
N11 C36 1.378(7) . ? 
N12 C36 1.355(8) . ? 
N12 C40 1.381(8) . ? 
C1 C2 1.362(8) . ? 
C2 C3 1.379(9) . ? 
C3 C4 1.369(9) . ? 
C4 C5 1.401(8) . ? 
C6 C7 1.411(8) . ? 
C7 C8 1.369(8) . ? 
C8 C9 1.382(9) . ? 
C9 C10 1.361(9) . ? 
C11 C12 1.358(9) . ? 
C12 C13 1.374(9) . ? 
C13 C14 1.358(9) . ? 
C14 C15 1.410(8) . ? 
C16 C17 1.391(8) . ? 
C17 C18 1.375(9) . ? 
C18 C19 1.385(9) . ? 
C19 C20 1.355(9) . ? 
C21 C22 1.362(8) . ? 
C22 C23 1.389(9) . ? 
C23 C24 1.369(9) . ? 
C24 C25 1.406(8) . ? 
C26 C27 1.397(8) . ? 
C27 C28 1.373(9) . ? 
C28 C29 1.372(9) . ? 
C29 C30 1.359(9) . ? 
C31 C32 1.348(8) . ? 
C32 C33 1.400(9) . ? 
C33 C34 1.366(9) . ? 
C34 C35 1.393(8) . ? 
C36 C37 1.393(8) . ? 
C37 C38 1.363(9) . ? 
C38 C39 1.382(9) . ? 
C39 C40 1.367(9) . ? 
Al1 Cl4 2.131(3) . ? 
Al1 Cl5 2.135(3) . ? 
Al1 Cl3 2.136(3) . ? 
Al1 Cl6 2.148(3) . ? 
C41 Cl8C 1.71(3) . ? 
C41 Cl8B 1.72(5) . ? 
C41 Cl7 1.770(9) . ? 
C41 Cl8A 1.79(2) . ? 
Cl8A Cl8C 0.75(3) . ? 
Cl8B Cl8C 1.03(7) . ? 
 
loop_ 
 _geom_angle_atom_site_label_1 
 _geom_angle_atom_site_label_2 
 _geom_angle_atom_site_label_3 
 _geom_angle 
 _geom_angle_site_symmetry_1 
 _geom_angle_site_symmetry_3 
 _geom_angle_publ_flag 
Cr2 Cr1 N10 88.48(13) . . ? 
Cr2 Cr1 N1 88.14(14) . . ? 
N10 Cr1 N1 89.3(2) . . ? 
Cr2 Cr1 N7 88.74(13) . . ? 
N10 Cr1 N7 88.0(2) . . ? 
N1 Cr1 N7 175.9(2) . . ? 
Cr2 Cr1 N4 87.70(13) . . ? 
N10 Cr1 N4 175.6(2) . . ? 
N1 Cr1 N4 88.5(2) . . ? 
N7 Cr1 N4 94.0(2) . . ? 
Cr2 Cr1 Cl1 178.65(6) . . ? 
N10 Cr1 Cl1 92.56(14) . . ? 
N1 Cr1 Cl1 91.01(14) . . ? 
N7 Cr1 Cl1 92.15(13) . . ? 
N4 Cr1 Cl1 91.23(13) . . ? 
N8 Cr2 N11 90.4(2) . . ? 
N8 Cr2 N5 89.8(2) . . ? 
N11 Cr2 N5 167.7(2) . . ? 
N8 Cr2 N2 167.2(2) . . ? 
N11 Cr2 N2 88.7(2) . . ? 
N5 Cr2 N2 88.4(2) . . ? 
N8 Cr2 Cr1 96.74(14) . . ? 
N11 Cr2 Cr1 95.80(15) . . ? 
N5 Cr2 Cr1 96.39(14) . . ? 
N2 Cr2 Cr1 96.00(14) . . ? 
N8 Cr2 Cr3 84.75(13) . . ? 
N11 Cr2 Cr3 83.69(14) . . ? 
N5 Cr2 Cr3 84.08(13) . . ? 
N2 Cr2 Cr3 82.51(13) . . ? 
Cr1 Cr2 Cr3 178.43(5) . . ? 
N3 Cr3 N6 85.6(2) . . ? 
N3 Cr3 N12 91.9(2) . . ? 
N6 Cr3 N12 169.5(2) . . ? 
N3 Cr3 N9 168.3(2) . . ? 
N6 Cr3 N9 91.5(2) . . ? 
N12 Cr3 N9 88.9(2) . . ? 
N3 Cr3 Cl2 95.31(14) . . ? 
N6 Cr3 Cl2 95.19(14) . . ? 
N12 Cr3 Cl2 95.25(15) . . ? 
N9 Cr3 Cl2 96.26(14) . . ? 
N3 Cr3 Cr2 84.93(13) . . ? 
N6 Cr3 Cr2 85.00(14) . . ? 
N12 Cr3 Cr2 84.58(14) . . ? 
N9 Cr3 Cr2 83.51(14) . . ? 
Cl2 Cr3 Cr2 179.71(6) . . ? 
C1 N1 C5 118.5(5) . . ? 
C1 N1 Cr1 122.9(4) . . ? 
C5 N1 Cr1 118.5(4) . . ? 
C5 N2 C6 123.2(5) . . ? 
C5 N2 Cr2 115.2(4) . . ? 
C6 N2 Cr2 120.6(4) . . ? 
C10 N3 C6 118.6(5) . . ? 
C10 N3 Cr3 121.2(4) . . ? 
C6 N3 Cr3 119.6(4) . . ? 
C11 N4 C15 118.3(5) . . ? 
C11 N4 Cr1 122.6(4) . . ? 
C15 N4 Cr1 118.5(4) . . ? 
C15 N5 C16 122.4(5) . . ? 
C15 N5 Cr2 113.6(3) . . ? 
C16 N5 Cr2 123.9(4) . . ? 
C20 N6 C16 117.9(5) . . ? 
C20 N6 Cr3 120.8(4) . . ? 
C16 N6 Cr3 120.8(4) . . ? 
C21 N7 C25 118.2(5) . . ? 
C21 N7 Cr1 123.3(4) . . ? 
C25 N7 Cr1 118.5(4) . . ? 
C25 N8 C26 122.3(5) . . ? 
C25 N8 Cr2 116.1(4) . . ? 
C26 N8 Cr2 120.3(4) . . ? 
C26 N9 C30 118.4(5) . . ? 
C26 N9 Cr3 122.4(4) . . ? 
C30 N9 Cr3 119.1(4) . . ? 
C31 N10 C35 119.1(5) . . ? 
C31 N10 Cr1 122.5(4) . . ? 
C35 N10 Cr1 118.4(4) . . ? 
C35 N11 C36 122.1(5) . . ? 
C35 N11 Cr2 114.9(4) . . ? 
C36 N11 Cr2 122.7(4) . . ? 
C36 N12 C40 117.7(5) . . ? 
C36 N12 Cr3 121.7(4) . . ? 
C40 N12 Cr3 120.6(4) . . ? 
N1 C1 C2 122.4(6) . . ? 
C1 C2 C3 119.7(6) . . ? 
C4 C3 C2 119.1(6) . . ? 
C3 C4 C5 120.1(6) . . ? 
N2 C5 N1 113.9(5) . . ? 
N2 C5 C4 125.8(5) . . ? 
N1 C5 C4 120.2(5) . . ? 
N3 C6 N2 115.8(5) . . ? 
N3 C6 C7 120.1(6) . . ? 
N2 C6 C7 123.8(5) . . ? 
C8 C7 C6 119.9(6) . . ? 
C7 C8 C9 118.9(6) . . ? 
C10 C9 C8 119.4(6) . . ? 
N3 C10 C9 123.0(6) . . ? 
N4 C11 C12 124.0(6) . . ? 
C11 C12 C13 117.9(6) . . ? 
C14 C13 C12 120.3(6) . . ? 
C13 C14 C15 120.2(6) . . ? 
N4 C15 N5 113.8(5) . . ? 
N4 C15 C14 119.2(5) . . ? 
N5 C15 C14 126.6(5) . . ? 
N6 C16 N5 115.1(5) . . ? 
N6 C16 C17 120.2(5) . . ? 
N5 C16 C17 124.6(5) . . ? 
C18 C17 C16 120.5(6) . . ? 
C17 C18 C19 118.8(6) . . ? 
C20 C19 C18 118.9(6) . . ? 
C19 C20 N6 123.6(6) . . ? 
N7 C21 C22 122.9(6) . . ? 
C21 C22 C23 119.5(6) . . ? 
C24 C23 C22 119.0(6) . . ? 
C23 C24 C25 119.8(6) . . ? 
N7 C25 N8 113.8(5) . . ? 
N7 C25 C24 120.5(5) . . ? 
N8 C25 C24 125.6(5) . . ? 
N9 C26 N8 114.8(5) . . ? 
N9 C26 C27 120.5(5) . . ? 
N8 C26 C27 124.3(6) . . ? 
C28 C27 C26 119.3(6) . . ? 
C29 C28 C27 120.3(6) . . ? 
C30 C29 C28 118.5(6) . . ? 
C29 C30 N9 123.0(6) . . ? 
N10 C31 C32 123.9(6) . . ? 
C31 C32 C33 118.2(6) . . ? 
C34 C33 C32 118.7(6) . . ? 
C33 C34 C35 121.2(6) . . ? 
N10 C35 N11 113.8(5) . . ? 
N10 C35 C34 119.0(5) . . ? 
N11 C35 C34 127.2(5) . . ? 
N12 C36 N11 114.6(5) . . ? 
N12 C36 C37 121.3(5) . . ? 
N11 C36 C37 123.9(5) . . ? 
C38 C37 C36 119.8(6) . . ? 
C37 C38 C39 119.9(6) . . ? 
C40 C39 C38 118.9(6) . . ? 
C39 C40 N12 122.4(6) . . ? 
Cl4 Al1 Cl5 108.07(13) . . ? 
Cl4 Al1 Cl3 111.70(12) . . ? 
Cl5 Al1 Cl3 108.85(11) . . ? 
Cl4 Al1 Cl6 110.09(11) . . ? 
Cl5 Al1 Cl6 110.80(12) . . ? 
Cl3 Al1 Cl6 107.34(12) . . ? 
Cl8C C41 Cl8B 34.9(22) . . ? 
Cl8C C41 Cl7 109.2(9) . . ? 
Cl8B C41 Cl7 107.2(16) . . ? 
Cl8C C41 Cl8A 24.6(11) . . ? 
Cl8B C41 Cl8A 10.7(29) . . ? 
Cl7 C41 Cl8A 110.8(8) . . ? 
Cl8C Cl8A C41 71.8(21) . . ? 
Cl8C Cl8B C41 72.5(36) . . ? 
Cl8A Cl8C Cl8B 12.2(37) . . ? 
Cl8A Cl8C C41 83.6(25) . . ? 
Cl8B Cl8C C41 72.6(35) . . ? 
 
loop_ 
 _geom_torsion_atom_site_label_1 
 _geom_torsion_atom_site_label_2 
 _geom_torsion_atom_site_label_3 
 _geom_torsion_atom_site_label_4 
 _geom_torsion 
 _geom_torsion_site_symmetry_1 
 _geom_torsion_site_symmetry_2 
 _geom_torsion_site_symmetry_3 
 _geom_torsion_site_symmetry_4 
 _geom_torsion_publ_flag 
 N1 Cr1 Cr3 N3 -48.4(2) . . . . ? 
 N4 Cr1 Cr3 N6 -45.8(2) . . . . ? 
 N7 Cr1 Cr3 N9 -43.8(2) . . . . ? 
 N10 Cr1 Cr3 N12 -45.2(2) . . . . ? 
 
_refine_diff_density_max    0.530 
_refine_diff_density_min   -0.460 
_refine_diff_density_rms    0.090 

#===END
 
data_cmpd_3
 
_audit_creation_method            SHELXL 

_chemical_formula_moiety          ? 
_chemical_formula_structural      '[Cr3(N3C10H8)4Cl2][FeCl4].CH2Cl2'
_chemical_formula_analytical      ? 
_chemical_formula_sum             'C41 H34 Cl8 Cr3 Fe N12' 
_chemical_formula_weight          1190.25 
_chemical_melting_point           ? 
_chemical_compound_source         synthesis
 
loop_ 
 _atom_type_symbol 
 _atom_type_description 
 _atom_type_scat_dispersion_real 
 _atom_type_scat_dispersion_imag 
 _atom_type_scat_source 
 'C'  'C'   0.0033   0.0016 
 'International Tables Vol C Tables 4.2.6.8 and 6.1.1.4' 
 'H'  'H'   0.0000   0.0000 
 'International Tables Vol C Tables 4.2.6.8 and 6.1.1.4' 
 'N'  'N'   0.0061   0.0033 
 'International Tables Vol C Tables 4.2.6.8 and 6.1.1.4' 
 'Cl'  'Cl'   0.1484   0.1585 
 'International Tables Vol C Tables 4.2.6.8 and 6.1.1.4' 
 'Cr'  'Cr'   0.3209   0.6236 
 'International Tables Vol C Tables 4.2.6.8 and 6.1.1.4' 
 'Fe'  'Fe'   0.3463   0.8444 
 'International Tables Vol C Tables 4.2.6.8 and 6.1.1.4' 
 
_symmetry_cell_setting            monoclinic
_symmetry_space_group_name_H-M    'P2(1)/n'
 
loop_ 
 _symmetry_equiv_pos_as_xyz 
 'x, y, z' 
 '-x+1/2, y+1/2, -z+1/2' 
 '-x, -y, -z' 
 'x-1/2, -y-1/2, z-1/2' 
 
_cell_length_a                    11.670(5) 
_cell_length_b                    28.398(4) 
_cell_length_c                    15.031(11) 
_cell_angle_alpha                 90.00 
_cell_angle_beta                  104.514(11) 
_cell_angle_gamma                 90.00 
_cell_volume                      4822.7(41) 
_cell_formula_units_Z             4 
_cell_measurement_temperature     213(2) 
_cell_measurement_reflns_used     164
_cell_measurement_theta_min       9.1
_cell_measurement_theta_max       16.4
 
_exptl_crystal_description        block
_exptl_crystal_colour             black
_exptl_crystal_size_max           0.50 
_exptl_crystal_size_mid           0.50 
_exptl_crystal_size_min           0.30 
_exptl_crystal_density_meas       'not measured'
_exptl_crystal_density_diffrn     1.639 
_exptl_crystal_density_method     ? 
_exptl_crystal_F_000              2392 
_exptl_absorpt_coefficient_mu     1.442 
_exptl_absorpt_correction_type    none
_exptl_absorpt_correction_T_min   ? 
_exptl_absorpt_correction_T_max   ? 
 
_diffrn_ambient_temperature       213(2) 
_diffrn_radiation_wavelength      0.71073 
_diffrn_radiation_type            MoK\a 
_diffrn_radiation_source          'fine-focus sealed tube' 
_diffrn_radiation_monochromator   graphite 
_diffrn_measurement_device        'Nonius FAST'
_diffrn_measurement_method        'Ellipsoid mask-fitting'
_diffrn_standards_number          'None (area detector)'
_diffrn_standards_interval_count  ? 
_diffrn_standards_interval_time   ? 
_diffrn_standards_decay_%         ? 
_diffrn_reflns_number             21641 
_diffrn_reflns_av_R_equivalents   0.0641 
_diffrn_reflns_av_sigmaI/netI     0.0380 
_diffrn_reflns_limit_h_min        -12 
_diffrn_reflns_limit_h_max        11 
_diffrn_reflns_limit_k_min        -30 
_diffrn_reflns_limit_k_max        30 
_diffrn_reflns_limit_l_min        -15 
_diffrn_reflns_limit_l_max        16 
_diffrn_reflns_theta_min          2.45 
_diffrn_reflns_theta_max          22.57 
_reflns_number_total              6073 
_reflns_number_observed           5412 
_reflns_observed_criterion        >2sigma(I) 
 
_computing_data_collection        MADNES
_computing_cell_refinement        MADNES
_computing_data_reduction         PROCOR
_computing_structure_solution     'SHELXS-86 (Sheldrick, 1990)' 
_computing_structure_refinement   'SHELXL-93 (Sheldrick, 1993)' 
_computing_molecular_graphics     'XP (Siemens, 1996)'
_computing_publication_material   'SHELXL-93 (Sheldrick, 1993)' 
 
_refine_special_details 
; 
 Refinement on F^2^ for ALL reflections except for 2 with very negative F^2^ 
 or flagged by the user for potential systematic errors.  Weighted R-factors 
 wR and all goodnesses of fit S are based on F^2^, conventional R-factors R 
 are based on F, with F set to zero for negative F^2^. The observed criterion 
 of F^2^ > 2sigma(F^2^) is used only for calculating _R_factor_obs etc. and is 
 not relevant to the choice of reflections for refinement.  R-factors based 
 on F^2^ are statistically about twice as large as those based on F, and R- 
 factors based on ALL data will be even larger. 
; 
 
_refine_ls_structure_factor_coef  Fsqd  
_refine_ls_matrix_type            full 
_refine_ls_weighting_scheme 
 'calc w=1/[\s^2^(Fo^2^)+(0.0370P)^2^+13.0000P] where P=(Fo^2^+2Fc^2^)/3' 
_atom_sites_solution_primary      direct 
_atom_sites_solution_secondary    difmap 
_atom_sites_solution_hydrogens    geom 
_refine_ls_hydrogen_treatment     noref
_refine_ls_extinction_method      none 
_refine_ls_extinction_coef        ? 
_refine_ls_number_reflns          6071 
_refine_ls_number_parameters      586 
_refine_ls_number_restraints      0 
_refine_ls_R_factor_all           0.0455 
_refine_ls_R_factor_obs           0.0399 
_refine_ls_wR_factor_all          0.1012 
_refine_ls_wR_factor_obs          0.0949 
_refine_ls_goodness_of_fit_all    1.084 
_refine_ls_goodness_of_fit_obs    1.084 
_refine_ls_restrained_S_all       1.085 
_refine_ls_restrained_S_obs       1.084 
_refine_ls_shift/esd_max          0.002 
_refine_ls_shift/esd_mean         0.000 
 
loop_ 
 _atom_site_label 
 _atom_site_type_symbol 
 _atom_site_fract_x 
 _atom_site_fract_y 
 _atom_site_fract_z 
 _atom_site_U_iso_or_equiv 
 _atom_site_thermal_displace_type 
 _atom_site_occupancy 
 _atom_site_calc_flag 
 _atom_site_refinement_flags 
 _atom_site_disorder_group 
Cr1 Cr 0.94242(5) 0.17202(2) 0.85158(4) 0.0155(2) Uani 1 d . . 
Cr2 Cr 0.78127(5) 0.15051(2) 0.85946(4) 0.0153(2) Uani 1 d . . 
Cr3 Cr 0.57346(5) 0.12391(2) 0.86513(4) 0.0190(2) Uani 1 d . . 
Cl1 Cl 1.13661(8) 0.20005(3) 0.84066(6) 0.0240(2) Uani 1 d . . 
Cl2 Cl 0.38876(9) 0.10003(4) 0.86992(7) 0.0329(3) Uani 1 d . . 
N1 N 0.9016(3) 0.23893(10) 0.8989(2) 0.0199(7) Uani 1 d . . 
N2 N 0.7584(3) 0.19976(10) 0.9502(2) 0.0183(7) Uani 1 d . . 
N3 N 0.6126(3) 0.15665(11) 0.9935(2) 0.0216(7) Uani 1 d . . 
N4 N 0.8651(3) 0.19490(10) 0.7165(2) 0.0187(7) Uani 1 d . . 
N5 N 0.6887(3) 0.19192(11) 0.7578(2) 0.0194(7) Uani 1 d . . 
N6 N 0.5209(3) 0.19085(11) 0.8124(2) 0.0216(7) Uani 1 d . . 
N7 N 0.9695(3) 0.10527(11) 0.8002(2) 0.0185(7) Uani 1 d . . 
N8 N 0.7673(3) 0.09794(10) 0.7684(2) 0.0177(7) Uani 1 d . . 
N9 N 0.5628(3) 0.09711(11) 0.7340(2) 0.0222(8) Uani 1 d . . 
N10 N 1.0123(3) 0.14505(10) 0.9857(2) 0.0190(7) Uani 1 d . . 
N11 N 0.8366(3) 0.10454(10) 0.9624(2) 0.0190(7) Uani 1 d . . 
N12 N 0.6604(3) 0.06238(11) 0.9209(2) 0.0201(7) Uani 1 d . . 
C1 C 0.9526(4) 0.27914(14) 0.8791(3) 0.0270(9) Uani 1 d . . 
H1 H 1.0161(4) 0.27665(14) 0.8512(3) 0.032 Uiso 1 calc R . 
C2 C 0.9166(4) 0.32337(15) 0.8975(3) 0.0381(11) Uani 1 d . . 
H2 H 0.9552(4) 0.35043(15) 0.8837(3) 0.046 Uiso 1 calc R . 
C3 C 0.8216(4) 0.3269(2) 0.9371(3) 0.0403(12) Uani 1 d . . 
H3 H 0.7946(4) 0.3567(2) 0.9500(3) 0.048 Uiso 1 calc R . 
C4 C 0.7675(4) 0.28714(14) 0.9572(3) 0.0313(10) Uani 1 d . . 
H4 H 0.7021(4) 0.28951(14) 0.9829(3) 0.038 Uiso 1 calc R . 
C5 C 0.8098(3) 0.24242(13) 0.9394(2) 0.0200(9) Uani 1 d . . 
C6 C 0.6914(3) 0.19265(13) 1.0126(3) 0.0210(9) Uani 1 d . . 
C7 C 0.7042(4) 0.21876(15) 1.0944(3) 0.0274(9) Uani 1 d . . 
H7 H 0.7588(4) 0.24369(15) 1.1078(3) 0.033 Uiso 1 calc R . 
C8 C 0.6369(4) 0.2077(2) 1.1542(3) 0.0325(10) Uani 1 d . . 
H8 H 0.6442(4) 0.2253(2) 1.2084(3) 0.039 Uiso 1 calc R . 
C9 C 0.5580(4) 0.1705(2) 1.1343(3) 0.0350(11) Uani 1 d . . 
H9 H 0.5111(4) 0.1624(2) 1.1746(3) 0.042 Uiso 1 calc R . 
C10 C 0.5495(4) 0.1458(2) 1.0556(3) 0.0296(10) Uani 1 d . . 
H10 H 0.4976(4) 0.1199(2) 1.0434(3) 0.035 Uiso 1 calc R . 
C11 C 0.9276(4) 0.20049(14) 0.6521(3) 0.0248(9) Uani 1 d . . 
H11 H 1.0091(4) 0.19393(14) 0.6686(3) 0.030 Uiso 1 calc R . 
C12 C 0.8770(4) 0.2153(2) 0.5639(3) 0.0304(10) Uani 1 d . . 
H12 H 0.9235(4) 0.2201(2) 0.5219(3) 0.036 Uiso 1 calc R . 
C13 C 0.7563(4) 0.22298(15) 0.5384(3) 0.0328(11) Uani 1 d . . 
H13 H 0.7195(4) 0.23253(15) 0.4781(3) 0.039 Uiso 1 calc R . 
C14 C 0.6902(4) 0.21669(14) 0.6008(3) 0.0278(10) Uani 1 d . . 
H14 H 0.6081(4) 0.22184(14) 0.5837(3) 0.033 Uiso 1 calc R . 
C15 C 0.7461(3) 0.20252(13) 0.6903(2) 0.0184(8) Uani 1 d . . 
C16 C 0.5881(3) 0.21469(13) 0.7654(2) 0.0195(9) Uani 1 d . . 
C17 C 0.5589(4) 0.26166(14) 0.7372(3) 0.0274(10) Uani 1 d . . 
H17 H 0.6029(4) 0.27772(14) 0.7022(3) 0.033 Uiso 1 calc R . 
C18 C 0.4664(4) 0.28367(14) 0.7608(3) 0.0296(10) Uani 1 d . . 
H18 H 0.4475(4) 0.31505(14) 0.7432(3) 0.035 Uiso 1 calc R . 
C19 C 0.4008(4) 0.2592(2) 0.8110(3) 0.0309(10) Uani 1 d . . 
H19 H 0.3375(4) 0.2739(2) 0.8283(3) 0.037 Uiso 1 calc R . 
C20 C 0.4294(3) 0.21362(15) 0.8349(3) 0.0275(10) Uani 1 d . . 
H20 H 0.3840(3) 0.19720(15) 0.8684(3) 0.033 Uiso 1 calc R . 
C21 C 1.0782(4) 0.08787(14) 0.8041(3) 0.0254(9) Uani 1 d . . 
H21 H 1.1443(4) 0.10677(14) 0.8299(3) 0.030 Uiso 1 calc R . 
C22 C 1.0971(4) 0.04418(15) 0.7725(3) 0.0327(10) Uani 1 d . . 
H22 H 1.1742(4) 0.03373(15) 0.7749(3) 0.039 Uiso 1 calc R . 
C23 C 1.0001(4) 0.01550(15) 0.7367(3) 0.0343(11) Uani 1 d . . 
H23 H 1.0109(4) -0.01481(15) 0.7150(3) 0.041 Uiso 1 calc R . 
C24 C 0.8878(4) 0.03185(14) 0.7332(3) 0.0291(10) Uani 1 d . . 
H24 H 0.8216(4) 0.01256(14) 0.7101(3) 0.035 Uiso 1 calc R . 
C25 C 0.8729(3) 0.07773(13) 0.7646(2) 0.0202(9) Uani 1 d . . 
C26 C 0.6626(3) 0.08728(13) 0.7056(2) 0.0215(9) Uani 1 d . . 
C27 C 0.6536(4) 0.07066(15) 0.6163(3) 0.0307(10) Uani 1 d . . 
H27 H 0.7225(4) 0.06463(15) 0.5965(3) 0.037 Uiso 1 calc R . 
C28 C 0.5452(4) 0.0632(2) 0.5579(3) 0.0383(12) Uani 1 d . . 
H28 H 0.5392(4) 0.0516(2) 0.4984(3) 0.046 Uiso 1 calc R . 
C29 C 0.4438(4) 0.0730(2) 0.5869(3) 0.0355(11) Uani 1 d . . 
H29 H 0.3684(4) 0.0678(2) 0.5476(3) 0.043 Uiso 1 calc R . 
C30 C 0.4553(4) 0.09010(15) 0.6730(3) 0.0304(10) Uani 1 d . . 
H30 H 0.3864(4) 0.09750(15) 0.6917(3) 0.036 Uiso 1 calc R . 
C31 C 1.1216(4) 0.15644(14) 1.0383(3) 0.0248(9) Uani 1 d . . 
H31 H 1.1676(4) 0.17796(14) 1.0147(3) 0.030 Uiso 1 calc R . 
C32 C 1.1679(4) 0.1381(2) 1.1240(3) 0.0311(10) Uani 1 d . . 
H32 H 1.2449(4) 0.1459(2) 1.1574(3) 0.037 Uiso 1 calc R . 
C33 C 1.0975(4) 0.1077(2) 1.1603(3) 0.0342(11) Uani 1 d . . 
H33 H 1.1267(4) 0.0952(2) 1.2195(3) 0.041 Uiso 1 calc R . 
C34 C 0.9864(4) 0.09598(14) 1.1103(3) 0.0272(10) Uani 1 d . . 
H34 H 0.9382(4) 0.07618(14) 1.1356(3) 0.033 Uiso 1 calc R . 
C35 C 0.9449(3) 0.11385(13) 1.0208(3) 0.0206(9) Uani 1 d . . 
C36 C 0.7782(3) 0.06187(13) 0.9629(2) 0.0195(9) Uani 1 d . . 
C37 C 0.8346(4) 0.01915(13) 0.9956(3) 0.0259(9) Uani 1 d . . 
H37 H 0.9159(4) 0.01888(13) 1.0249(3) 0.031 Uiso 1 calc R . 
C38 C 0.7713(4) -0.02206(14) 0.9850(3) 0.0339(11) Uani 1 d . . 
H38 H 0.8086(4) -0.05057(14) 1.0072(3) 0.041 Uiso 1 calc R . 
C39 C 0.6511(4) -0.02115(15) 0.9409(3) 0.0348(11) Uani 1 d . . 
H39 H 0.6060(4) -0.04897(15) 0.9324(3) 0.042 Uiso 1 calc R . 
C40 C 0.6006(4) 0.02088(14) 0.9103(3) 0.0280(10) Uani 1 d . . 
H40 H 0.5196(4) 0.02126(14) 0.8801(3) 0.034 Uiso 1 calc R . 
Fe1 Fe 0.67218(6) 0.06628(2) 0.31739(4) 0.0344(2) Uani 1 d . . 
Cl3 Cl 0.77817(11) 0.01743(4) 0.41938(9) 0.0494(3) Uani 1 d . . 
Cl4 Cl 0.48171(12) 0.05465(5) 0.29970(9) 0.0532(3) Uani 1 d . . 
Cl5 Cl 0.71064(15) 0.05611(5) 0.18338(9) 0.0629(4) Uani 1 d . . 
Cl6 Cl 0.71542(13) 0.13807(4) 0.36936(10) 0.0568(4) Uani 1 d . . 
C41 C 0.0304(5) 0.0938(2) 0.5122(4) 0.062(2) Uani 1 d . . 
H41A H 0.0358(5) 0.0605(2) 0.5298(4) 0.074 Uiso 1 calc R . 
H41B H -0.0484(5) 0.1051(2) 0.5138(4) 0.074 Uiso 1 calc R . 
Cl7 Cl 0.0481(2) 0.09927(9) 0.40125(13) 0.1133(9) Uani 1 d . . 
Cl8 Cl 0.13832(13) 0.12583(5) 0.59123(9) 0.0575(4) Uani 1 d . . 
 
loop_ 
 _atom_site_aniso_label 
 _atom_site_aniso_U_11 
 _atom_site_aniso_U_22 
 _atom_site_aniso_U_33 
 _atom_site_aniso_U_23 
 _atom_site_aniso_U_13 
 _atom_site_aniso_U_12 
Cr1 0.0149(3) 0.0152(3) 0.0171(3) -0.0002(2) 0.0053(2) 0.0001(2) 
Cr2 0.0155(3) 0.0140(3) 0.0171(3) 0.0006(2) 0.0056(2) 0.0001(2) 
Cr3 0.0151(3) 0.0186(3) 0.0244(3) 0.0024(3) 0.0071(3) -0.0020(2) 
Cl1 0.0168(5) 0.0280(5) 0.0294(5) -0.0005(4) 0.0096(4) -0.0024(4) 
Cl2 0.0203(6) 0.0364(6) 0.0440(6) 0.0045(5) 0.0121(5) -0.0065(4) 
N1 0.019(2) 0.017(2) 0.024(2) -0.0028(13) 0.0069(14) -0.0027(13) 
N2 0.015(2) 0.017(2) 0.024(2) -0.0002(13) 0.0077(14) 0.0005(13) 
N3 0.021(2) 0.021(2) 0.027(2) 0.0025(14) 0.0112(14) 0.0020(14) 
N4 0.016(2) 0.020(2) 0.021(2) 0.0014(13) 0.0075(14) 0.0003(13) 
N5 0.015(2) 0.021(2) 0.022(2) 0.0029(13) 0.0053(14) -0.0002(14) 
N6 0.014(2) 0.025(2) 0.025(2) 0.0007(14) 0.0040(14) 0.0001(14) 
N7 0.017(2) 0.023(2) 0.019(2) 0.0017(13) 0.0096(13) 0.0014(14) 
N8 0.017(2) 0.019(2) 0.017(2) -0.0025(13) 0.0051(13) -0.0011(13) 
N9 0.021(2) 0.021(2) 0.024(2) 0.0033(13) 0.0046(15) -0.0045(14) 
N10 0.019(2) 0.018(2) 0.022(2) -0.0022(13) 0.0074(14) -0.0007(13) 
N11 0.019(2) 0.018(2) 0.020(2) 0.0014(13) 0.0060(14) 0.0016(14) 
N12 0.019(2) 0.021(2) 0.022(2) 0.0029(13) 0.0074(14) -0.0018(14) 
C1 0.022(2) 0.020(2) 0.040(2) -0.001(2) 0.011(2) -0.007(2) 
C2 0.042(3) 0.021(2) 0.056(3) 0.000(2) 0.020(2) -0.010(2) 
C3 0.038(3) 0.021(2) 0.066(3) -0.007(2) 0.022(2) -0.001(2) 
C4 0.032(3) 0.022(2) 0.045(3) -0.008(2) 0.020(2) -0.001(2) 
C5 0.018(2) 0.022(2) 0.019(2) -0.003(2) 0.001(2) 0.000(2) 
C6 0.017(2) 0.023(2) 0.023(2) 0.002(2) 0.006(2) 0.005(2) 
C7 0.026(2) 0.028(2) 0.029(2) -0.003(2) 0.008(2) 0.001(2) 
C8 0.032(3) 0.041(3) 0.027(2) -0.005(2) 0.013(2) 0.010(2) 
C9 0.033(3) 0.047(3) 0.031(2) 0.001(2) 0.018(2) 0.003(2) 
C10 0.023(2) 0.034(2) 0.036(2) 0.007(2) 0.016(2) 0.000(2) 
C11 0.021(2) 0.030(2) 0.027(2) -0.002(2) 0.012(2) -0.003(2) 
C12 0.032(3) 0.040(3) 0.023(2) 0.004(2) 0.015(2) -0.003(2) 
C13 0.044(3) 0.033(2) 0.020(2) 0.004(2) 0.007(2) 0.005(2) 
C14 0.023(2) 0.032(2) 0.027(2) 0.003(2) 0.004(2) 0.007(2) 
C15 0.020(2) 0.016(2) 0.020(2) 0.001(2) 0.008(2) 0.000(2) 
C16 0.015(2) 0.023(2) 0.020(2) 0.002(2) 0.003(2) 0.001(2) 
C17 0.028(2) 0.024(2) 0.030(2) 0.008(2) 0.007(2) 0.002(2) 
C18 0.029(3) 0.020(2) 0.039(2) 0.006(2) 0.009(2) 0.006(2) 
C19 0.015(2) 0.037(3) 0.042(3) 0.002(2) 0.010(2) 0.011(2) 
C20 0.016(2) 0.034(3) 0.034(2) 0.004(2) 0.010(2) 0.003(2) 
C21 0.023(2) 0.026(2) 0.029(2) -0.001(2) 0.010(2) 0.002(2) 
C22 0.028(3) 0.031(2) 0.041(3) 0.003(2) 0.015(2) 0.009(2) 
C23 0.038(3) 0.022(2) 0.044(3) -0.007(2) 0.013(2) 0.006(2) 
C24 0.030(3) 0.023(2) 0.034(2) -0.004(2) 0.007(2) -0.003(2) 
C25 0.027(2) 0.020(2) 0.015(2) 0.003(2) 0.006(2) -0.001(2) 
C26 0.025(2) 0.019(2) 0.020(2) 0.003(2) 0.005(2) -0.005(2) 
C27 0.032(3) 0.037(3) 0.024(2) -0.004(2) 0.009(2) -0.006(2) 
C28 0.041(3) 0.048(3) 0.023(2) -0.005(2) 0.001(2) -0.009(2) 
C29 0.028(3) 0.040(3) 0.031(3) 0.004(2) -0.006(2) -0.013(2) 
C30 0.022(2) 0.035(2) 0.031(2) 0.005(2) 0.001(2) -0.004(2) 
C31 0.021(2) 0.022(2) 0.030(2) -0.004(2) 0.002(2) -0.005(2) 
C32 0.023(2) 0.040(3) 0.025(2) -0.004(2) -0.004(2) -0.001(2) 
C33 0.037(3) 0.042(3) 0.019(2) 0.004(2) -0.003(2) 0.003(2) 
C34 0.033(3) 0.029(2) 0.021(2) 0.005(2) 0.009(2) 0.001(2) 
C35 0.020(2) 0.022(2) 0.020(2) -0.001(2) 0.007(2) 0.003(2) 
C36 0.028(2) 0.016(2) 0.018(2) -0.0009(15) 0.012(2) -0.001(2) 
C37 0.027(2) 0.023(2) 0.029(2) 0.004(2) 0.010(2) 0.005(2) 
C38 0.055(3) 0.017(2) 0.030(2) 0.006(2) 0.010(2) 0.004(2) 
C39 0.050(3) 0.020(2) 0.034(2) 0.003(2) 0.010(2) -0.008(2) 
C40 0.030(2) 0.022(2) 0.032(2) 0.001(2) 0.008(2) -0.007(2) 
Fe1 0.0411(4) 0.0294(4) 0.0371(4) -0.0022(3) 0.0178(3) 0.0039(3) 
Cl3 0.0491(8) 0.0401(7) 0.0581(8) 0.0111(6) 0.0118(6) 0.0017(6) 
Cl4 0.0429(8) 0.0683(9) 0.0470(7) -0.0143(6) 0.0085(6) -0.0046(6) 
Cl5 0.0907(11) 0.0606(9) 0.0519(8) 0.0126(6) 0.0451(8) 0.0376(8) 
Cl6 0.0630(9) 0.0314(7) 0.0754(9) -0.0105(6) 0.0164(7) -0.0028(6) 
C41 0.054(4) 0.062(4) 0.076(4) 0.003(3) 0.029(3) -0.011(3) 
Cl7 0.128(2) 0.149(2) 0.0726(12) -0.0421(12) 0.0432(12) -0.079(2) 
Cl8 0.0537(9) 0.0710(9) 0.0524(8) 0.0016(7) 0.0220(6) 0.0071(7) 
 
_geom_special_details 
; 
 All esds (except the esd in the dihedral angle between two l.s. planes) 
 are estimated using the full covariance matrix.  The cell esds are taken 
 into account individually in the estimation of esds in distances, angles 
 and torsion angles; correlations between esds in cell parameters are only 
 used when they are defined by crystal symmetry.  An approximate (isotropic) 
 treatment of cell esds is used for estimating esds involving l.s. planes. 
; 
 
loop_ 
 _geom_bond_atom_site_label_1 
 _geom_bond_atom_site_label_2 
 _geom_bond_distance 
 _geom_bond_site_symmetry_2 
 _geom_bond_publ_flag 
Cr1 Cr2 2.0090(12) . ? 
Cr1 N7 2.101(3) . ? 
Cr1 N4 2.108(3) . ? 
Cr1 N10 2.119(3) . ? 
Cr1 N1 2.124(3) . ? 
Cr1 Cl1 2.4460(15) . ? 
Cr2 N8 2.004(3) . ? 
Cr2 N11 2.004(3) . ? 
Cr2 N5 2.014(3) . ? 
Cr2 N2 2.017(3) . ? 
Cr2 Cr3 2.5618(13) . ? 
Cr3 N3 2.087(3) . ? 
Cr3 N12 2.088(3) . ? 
Cr3 N9 2.088(3) . ? 
Cr3 N6 2.091(3) . ? 
Cr3 Cl2 2.2779(15) . ? 
N1 C1 1.355(5) . ? 
N1 C5 1.362(5) . ? 
N2 C6 1.379(5) . ? 
N2 C5 1.379(5) . ? 
N3 C6 1.357(5) . ? 
N3 C10 1.361(5) . ? 
N4 C11 1.358(5) . ? 
N4 C15 1.363(5) . ? 
N5 C16 1.370(5) . ? 
N5 C15 1.381(5) . ? 
N6 C16 1.360(5) . ? 
N6 C20 1.362(5) . ? 
N7 C21 1.349(5) . ? 
N7 C25 1.366(5) . ? 
N8 C25 1.374(5) . ? 
N8 C26 1.377(5) . ? 
N9 C26 1.366(5) . ? 
N9 C30 1.369(5) . ? 
N10 C31 1.360(5) . ? 
N10 C35 1.375(5) . ? 
N11 C35 1.372(5) . ? 
N11 C36 1.391(5) . ? 
N12 C40 1.359(5) . ? 
N12 C36 1.362(5) . ? 
C1 C2 1.375(6) . ? 
C2 C3 1.386(7) . ? 
C3 C4 1.364(6) . ? 
C4 C5 1.412(6) . ? 
C6 C7 1.410(6) . ? 
C7 C8 1.371(6) . ? 
C8 C9 1.385(6) . ? 
C9 C10 1.358(6) . ? 
C11 C12 1.375(6) . ? 
C12 C13 1.382(6) . ? 
C13 C14 1.367(6) . ? 
C14 C15 1.399(6) . ? 
C16 C17 1.415(6) . ? 
C17 C18 1.369(6) . ? 
C18 C19 1.388(6) . ? 
C19 C20 1.363(6) . ? 
C21 C22 1.366(6) . ? 
C22 C23 1.389(6) . ? 
C23 C24 1.379(6) . ? 
C24 C25 1.411(6) . ? 
C26 C27 1.403(6) . ? 
C27 C28 1.363(6) . ? 
C28 C29 1.388(7) . ? 
C29 C30 1.358(6) . ? 
C31 C32 1.368(6) . ? 
C32 C33 1.394(6) . ? 
C33 C34 1.367(6) . ? 
C34 C35 1.406(5) . ? 
C36 C37 1.409(5) . ? 
C37 C38 1.371(6) . ? 
C38 C39 1.394(6) . ? 
C39 C40 1.359(6) . ? 
Fe1 Cl5 2.190(2) . ? 
Fe1 Cl6 2.1961(14) . ? 
Fe1 Cl4 2.197(2) . ? 
Fe1 Cl3 2.203(2) . ? 
C41 Cl7 1.738(6) . ? 
C41 Cl8 1.754(6) . ? 
 
loop_ 
 _geom_angle_atom_site_label_1 
 _geom_angle_atom_site_label_2 
 _geom_angle_atom_site_label_3 
 _geom_angle 
 _geom_angle_site_symmetry_1 
 _geom_angle_site_symmetry_3 
 _geom_angle_publ_flag 
Cr2 Cr1 N7 88.66(9) . . ? 
Cr2 Cr1 N4 88.26(9) . . ? 
N7 Cr1 N4 89.50(12) . . ? 
Cr2 Cr1 N10 88.69(9) . . ? 
N7 Cr1 N10 88.05(12) . . ? 
N4 Cr1 N10 176.13(12) . . ? 
Cr2 Cr1 N1 87.74(9) . . ? 
N7 Cr1 N1 175.80(12) . . ? 
N4 Cr1 N1 88.22(12) . . ? 
N10 Cr1 N1 94.04(12) . . ? 
Cr2 Cr1 Cl1 178.63(4) . . ? 
N7 Cr1 Cl1 92.38(9) . . ? 
N4 Cr1 Cl1 90.86(9) . . ? 
N10 Cr1 Cl1 92.24(9) . . ? 
N1 Cr1 Cl1 91.18(9) . . ? 
N8 Cr2 N11 89.86(13) . . ? 
N8 Cr2 Cr1 95.95(9) . . ? 
N11 Cr2 Cr1 96.81(9) . . ? 
N8 Cr2 N5 88.89(13) . . ? 
N11 Cr2 N5 166.88(13) . . ? 
Cr1 Cr2 N5 96.30(9) . . ? 
N8 Cr2 N2 167.46(13) . . ? 
N11 Cr2 N2 90.07(13) . . ? 
Cr1 Cr2 N2 96.51(9) . . ? 
N5 Cr2 N2 88.34(13) . . ? 
N8 Cr2 Cr3 83.52(9) . . ? 
N11 Cr2 Cr3 84.64(9) . . ? 
Cr1 Cr2 Cr3 178.46(3) . . ? 
N5 Cr2 Cr3 82.25(9) . . ? 
N2 Cr2 Cr3 83.99(9) . . ? 
N3 Cr3 N12 91.73(12) . . ? 
N3 Cr3 N9 169.44(13) . . ? 
N12 Cr3 N9 88.95(12) . . ? 
N3 Cr3 N6 85.46(12) . . ? 
N12 Cr3 N6 168.42(12) . . ? 
N9 Cr3 N6 91.80(12) . . ? 
N3 Cr3 Cl2 95.33(10) . . ? 
N12 Cr3 Cl2 96.14(9) . . ? 
N9 Cr3 Cl2 95.07(10) . . ? 
N6 Cr3 Cl2 95.31(9) . . ? 
N3 Cr3 Cr2 84.83(9) . . ? 
N12 Cr3 Cr2 83.74(9) . . ? 
N9 Cr3 Cr2 84.78(9) . . ? 
N6 Cr3 Cr2 84.82(9) . . ? 
Cl2 Cr3 Cr2 179.81(4) . . ? 
C1 N1 C5 118.4(3) . . ? 
C1 N1 Cr1 122.2(3) . . ? 
C5 N1 Cr1 118.8(2) . . ? 
C6 N2 C5 123.1(3) . . ? 
C6 N2 Cr2 123.5(2) . . ? 
C5 N2 Cr2 113.2(2) . . ? 
C6 N3 C10 118.7(3) . . ? 
C6 N3 Cr3 120.7(2) . . ? 
C10 N3 Cr3 120.1(3) . . ? 
C11 N4 C15 117.8(3) . . ? 
C11 N4 Cr1 123.1(3) . . ? 
C15 N4 Cr1 119.1(2) . . ? 
C16 N5 C15 122.8(3) . . ? 
C16 N5 Cr2 121.4(2) . . ? 
C15 N5 Cr2 114.7(2) . . ? 
C16 N6 C20 118.9(3) . . ? 
C16 N6 Cr3 119.8(2) . . ? 
C20 N6 Cr3 120.8(3) . . ? 
C21 N7 C25 118.8(3) . . ? 
C21 N7 Cr1 122.7(3) . . ? 
C25 N7 Cr1 118.4(2) . . ? 
C25 N8 C26 122.0(3) . . ? 
C25 N8 Cr2 114.8(2) . . ? 
C26 N8 Cr2 122.6(3) . . ? 
C26 N9 C30 118.1(3) . . ? 
C26 N9 Cr3 121.0(2) . . ? 
C30 N9 Cr3 120.8(3) . . ? 
C31 N10 C35 118.2(3) . . ? 
C31 N10 Cr1 123.3(3) . . ? 
C35 N10 Cr1 118.5(2) . . ? 
C35 N11 C36 122.6(3) . . ? 
C35 N11 Cr2 115.8(2) . . ? 
C36 N11 Cr2 120.6(2) . . ? 
C40 N12 C36 118.3(3) . . ? 
C40 N12 Cr3 119.7(3) . . ? 
C36 N12 Cr3 121.9(2) . . ? 
N1 C1 C2 123.5(4) . . ? 
C1 C2 C3 118.0(4) . . ? 
C4 C3 C2 120.0(4) . . ? 
C3 C4 C5 119.9(4) . . ? 
N1 C5 N2 113.8(3) . . ? 
N1 C5 C4 120.1(4) . . ? 
N2 C5 C4 125.7(4) . . ? 
N3 C6 N2 115.9(3) . . ? 
N3 C6 C7 119.9(4) . . ? 
N2 C6 C7 124.2(4) . . ? 
C8 C7 C6 119.9(4) . . ? 
C7 C8 C9 119.5(4) . . ? 
C10 C9 C8 118.8(4) . . ? 
C9 C10 N3 123.1(4) . . ? 
N4 C11 C12 123.0(4) . . ? 
C11 C12 C13 118.5(4) . . ? 
C14 C13 C12 120.0(4) . . ? 
C13 C14 C15 119.4(4) . . ? 
N4 C15 N5 113.6(3) . . ? 
N4 C15 C14 121.2(3) . . ? 
N5 C15 C14 125.1(4) . . ? 
N6 C16 N5 115.2(3) . . ? 
N6 C16 C17 119.9(3) . . ? 
N5 C16 C17 124.5(3) . . ? 
C18 C17 C16 119.9(4) . . ? 
C17 C18 C19 119.4(4) . . ? 
C20 C19 C18 119.2(4) . . ? 
N6 C20 C19 122.7(4) . . ? 
N7 C21 C22 123.3(4) . . ? 
C21 C22 C23 118.7(4) . . ? 
C24 C23 C22 119.5(4) . . ? 
C23 C24 C25 119.6(4) . . ? 
N7 C25 N8 113.9(3) . . ? 
N7 C25 C24 120.0(4) . . ? 
N8 C25 C24 125.9(4) . . ? 
N9 C26 N8 114.9(3) . . ? 
N9 C26 C27 120.1(4) . . ? 
N8 C26 C27 124.9(4) . . ? 
C28 C27 C26 120.2(4) . . ? 
C27 C28 C29 119.6(4) . . ? 
C30 C29 C28 118.9(4) . . ? 
C29 C30 N9 123.0(4) . . ? 
N10 C31 C32 123.3(4) . . ? 
C31 C32 C33 118.1(4) . . ? 
C34 C33 C32 120.4(4) . . ? 
C33 C34 C35 119.3(4) . . ? 
N11 C35 N10 113.8(3) . . ? 
N11 C35 C34 125.7(4) . . ? 
N10 C35 C34 120.5(3) . . ? 
N12 C36 N11 115.3(3) . . ? 
N12 C36 C37 120.0(3) . . ? 
N11 C36 C37 124.5(4) . . ? 
C38 C37 C36 120.2(4) . . ? 
C37 C38 C39 119.2(4) . . ? 
C40 C39 C38 118.5(4) . . ? 
N12 C40 C39 123.7(4) . . ? 
Cl5 Fe1 Cl6 111.58(7) . . ? 
Cl5 Fe1 Cl4 107.66(7) . . ? 
Cl6 Fe1 Cl4 108.54(6) . . ? 
Cl5 Fe1 Cl3 110.38(7) . . ? 
Cl6 Fe1 Cl3 107.34(6) . . ? 
Cl4 Fe1 Cl3 111.35(6) . . ? 
Cl7 C41 Cl8 111.4(3) . . ? 
 
loop_ 
 _geom_torsion_atom_site_label_1 
 _geom_torsion_atom_site_label_2 
 _geom_torsion_atom_site_label_3 
 _geom_torsion_atom_site_label_4 
 _geom_torsion 
 _geom_torsion_site_symmetry_1 
 _geom_torsion_site_symmetry_2 
 _geom_torsion_site_symmetry_3 
 _geom_torsion_site_symmetry_4 
 _geom_torsion_publ_flag 
 N1 Cr1 Cr3 N3 -45.68(12) . . . . ? 
 N4 Cr1 Cr3 N6 -48.12(12) . . . . ? 
 N7 Cr1 Cr3 N9 -45.30(12) . . . . ? 
 N10 Cr1 Cr3 N12 -43.84(12) . . . . ? 
 
_refine_diff_density_max    1.006 
_refine_diff_density_min   -0.912 
_refine_diff_density_rms    0.080 
 
#===END

data_cmpd_4
 
_audit_creation_method            SHELXL 

_chemical_formula_moiety          ? 
_chemical_formula_structural      '[Cr3(N3C10H8)4Cl2]I3.C4H8O.(H2O)0.5'
_chemical_formula_analytical      ? 
_chemical_formula_sum             'C44 H41 Cl2 Cr3 I3 N12 O1.50' 
_chemical_formula_weight          1369.49 
_chemical_melting_point           ? 
_chemical_compound_source         synthesis
 
loop_ 
 _atom_type_symbol 
 _atom_type_description 
 _atom_type_scat_dispersion_real 
 _atom_type_scat_dispersion_imag 
 _atom_type_scat_source 
 'C'  'C'   0.0033   0.0016 
 'International Tables Vol C Tables 4.2.6.8 and 6.1.1.4' 
 'H'  'H'   0.0000   0.0000 
 'International Tables Vol C Tables 4.2.6.8 and 6.1.1.4' 
 'N'  'N'   0.0061   0.0033 
 'International Tables Vol C Tables 4.2.6.8 and 6.1.1.4' 
 'Cr'  'Cr'   0.3209   0.6236 
 'International Tables Vol C Tables 4.2.6.8 and 6.1.1.4' 
 'I'  'I'  -0.4742   1.8119 
 'International Tables Vol C Tables 4.2.6.8 and 6.1.1.4' 
 'O'  'O'   0.0106   0.0060 
 'International Tables Vol C Tables 4.2.6.8 and 6.1.1.4' 
 'Cl'  'Cl'   0.1484   0.1585 
 'International Tables Vol C Tables 4.2.6.8 and 6.1.1.4' 
 
_symmetry_cell_setting            monoclinic
_symmetry_space_group_name_H-M    'P 1 21/c 1'
 
loop_ 
 _symmetry_equiv_pos_as_xyz 
 'x, y, z' 
 '-x, y+1/2, -z+1/2' 
 '-x, -y, -z' 
 'x, -y-1/2, z-1/2' 
 
_cell_length_a                    13.571(3) 
_cell_length_b                    34.607(9) 
_cell_length_c                    11.424(3) 
_cell_angle_alpha                 90.00 
_cell_angle_beta                  113.108(3) 
_cell_angle_gamma                 90.00 
_cell_volume                      4934.8(21) 
_cell_formula_units_Z             4 
_cell_measurement_temperature     213(2) 
_cell_measurement_reflns_used     173
_cell_measurement_theta_min       9.0
_cell_measurement_theta_max       20.1
 
_exptl_crystal_description        prism
_exptl_crystal_colour             ? 
_exptl_crystal_size_max           0.30 
_exptl_crystal_size_mid           0.30 
_exptl_crystal_size_min           0.20 
_exptl_crystal_density_meas       'not measured'
_exptl_crystal_density_diffrn     1.843 
_exptl_crystal_density_method     ? 
_exptl_crystal_F_000              2664 
_exptl_absorpt_coefficient_mu     2.683 
_exptl_absorpt_correction_type    multi-scan
_exptl_absorpt_correction_T_min   0.50
_exptl_absorpt_correction_T_max   0.61
 
_diffrn_ambient_temperature       213(2) 
_diffrn_radiation_wavelength      0.71073 
_diffrn_radiation_type            MoK\a 
_diffrn_radiation_source          'fine-focus sealed tube' 
_diffrn_radiation_monochromator   graphite 
_diffrn_measurement_device        'Nonius FAST'
_diffrn_measurement_method        'Ellipsoid-mask fitting'
_diffrn_standards_number          0
_diffrn_standards_interval_count  ? 
_diffrn_standards_interval_time   ? 
_diffrn_standards_decay_%         ? 
_diffrn_reflns_number             18217 
_diffrn_reflns_av_R_equivalents   0.0566 
_diffrn_reflns_av_sigmaI/netI     0.0473 
_diffrn_reflns_limit_h_min        -14 
_diffrn_reflns_limit_h_max        14 
_diffrn_reflns_limit_k_min        -37 
_diffrn_reflns_limit_k_max        37 
_diffrn_reflns_limit_l_min        -12 
_diffrn_reflns_limit_l_max        10 
_diffrn_reflns_theta_min          2.07 
_diffrn_reflns_theta_max          22.65 
_reflns_number_total              6269 
_reflns_number_observed           4913 
_reflns_observed_criterion        >2sigma(I) 
 
_computing_data_collection        MADNES
_computing_cell_refinement        MADNES
_computing_data_reduction         PROCOR
_computing_structure_solution     'SHELXS-86 (Sheldrick, 1990)' 
_computing_structure_refinement   'SHELXL-93 (Sheldrick, 1993)' 
_computing_molecular_graphics     'XP (Siemens, 1996)'
_computing_publication_material   'SHELXL-93 (Sheldrick, 1993)' 
 
_refine_special_details 
; 
 Refinement on F^2^ for ALL reflections except for 10 with very negative F^2^ 
 or flagged by the user for potential systematic errors.  Weighted R-factors 
 wR and all goodnesses of fit S are based on F^2^, conventional R-factors R 
 are based on F, with F set to zero for negative F^2^. The observed criterion 
 of F^2^ > 2sigma(F^2^) is used only for calculating _R_factor_obs etc. and is 
 not relevant to the choice of reflections for refinement.  R-factors based 
 on F^2^ are statistically about twice as large as those based on F, and R- 
 factors based on ALL data will be even larger. 
; 
 
_refine_ls_structure_factor_coef  Fsqd  
_refine_ls_matrix_type            full 
_refine_ls_weighting_scheme 
 'calc w=1/[\s^2^(Fo^2^)+(0.0320P)^2^+110.0000P] where P=(Fo^2^+2Fc^2^)/3' 
_atom_sites_solution_primary      direct 
_atom_sites_solution_secondary    difmap 
_atom_sites_solution_hydrogens    geom 
_refine_ls_hydrogen_treatment     noref
_refine_ls_extinction_method      none 
_refine_ls_extinction_coef        ? 
_refine_ls_number_reflns          6259 
_refine_ls_number_parameters      597 
_refine_ls_number_restraints      3 
_refine_ls_R_factor_all           0.0992 
_refine_ls_R_factor_obs           0.0716 
_refine_ls_wR_factor_all          0.1735 
_refine_ls_wR_factor_obs          0.1496 
_refine_ls_goodness_of_fit_all    1.140 
_refine_ls_goodness_of_fit_obs    1.132 
_refine_ls_restrained_S_all       1.148 
_refine_ls_restrained_S_obs       1.132 
_refine_ls_shift/esd_max          -0.153 
_refine_ls_shift/esd_mean         0.001 
 
loop_ 
 _atom_site_label 
 _atom_site_type_symbol 
 _atom_site_fract_x 
 _atom_site_fract_y 
 _atom_site_fract_z 
 _atom_site_U_iso_or_equiv 
 _atom_site_thermal_displace_type 
 _atom_site_occupancy 
 _atom_site_calc_flag 
 _atom_site_refinement_flags 
 _atom_site_disorder_group 
Cr1 Cr 0.2867(2) 0.13651(5) 0.3900(2) 0.0275(5) Uani 1 d D . 
Cr2A Cr 0.3011(5) 0.1206(2) 0.2220(10) 0.023(2) Uani 0.81(3) d PD 1 
Cr2B Cr 0.3026(26) 0.1184(9) 0.1880(23) 0.023(2) Uani 0.19(3) d PD 2 
Cr3 Cr 0.3216(2) 0.10160(5) 0.0222(2) 0.0249(5) Uani 1 d D . 
Cl1 Cl 0.2738(3) 0.15808(10) 0.5811(3) 0.0441(9) Uani 1 d . . 
Cl2 Cl 0.3422(3) 0.08302(9) -0.1610(3) 0.0352(8) Uani 1 d . . 
N1 N 0.1264(8) 0.1501(3) 0.2779(10) 0.030(3) Uani 1 d . . 
N2 N 0.1455(8) 0.1122(3) 0.1230(9) 0.026(2) Uani 1 d . . 
N3 N 0.1754(8) 0.0731(3) -0.0243(9) 0.029(2) Uani 1 d . . 
N4 N 0.2412(8) 0.0795(3) 0.4059(9) 0.025(2) Uani 1 d . . 
N5 N 0.3188(8) 0.0641(2) 0.2659(9) 0.023(2) Uani 1 d . . 
N6 N 0.4089(7) 0.0556(3) 0.1322(9) 0.023(2) Uani 1 d . . 
N7 N 0.4470(8) 0.1196(3) 0.4843(9) 0.029(2) Uani 1 d . . 
N8 N 0.4584(8) 0.1270(3) 0.2913(9) 0.027(2) Uani 1 d . . 
N9 N 0.4651(7) 0.1329(3) 0.0929(10) 0.024(2) Uani 1 d . . 
N10 N 0.3376(8) 0.1918(3) 0.3592(9) 0.027(2) Uani 1 d . . 
N11 N 0.2813(8) 0.1744(3) 0.1489(9) 0.026(2) Uani 1 d . . 
N12 N 0.2352(8) 0.1524(3) -0.0543(9) 0.025(2) Uani 1 d . . 
C1 C 0.0667(11) 0.1745(4) 0.3189(14) 0.037(3) Uani 1 d . . 
H1 H 0.0984(11) 0.1847(4) 0.4016(14) 0.044 Uiso 1 calc R . 
C2 C -0.0356(13) 0.1846(4) 0.2461(18) 0.056(4) Uani 1 d . . 
H2 H -0.0745(13) 0.2010(4) 0.2781(18) 0.067 Uiso 1 calc R . 
C3 C -0.0806(11) 0.1705(5) 0.1248(17) 0.058(5) Uani 1 d . . 
H3 H -0.1513(11) 0.1773(5) 0.0722(17) 0.070 Uiso 1 calc R . 
C4 C -0.0244(10) 0.1467(4) 0.0797(15) 0.042(4) Uani 1 d . . 
H4 H -0.0553(10) 0.1381(4) -0.0051(15) 0.051 Uiso 1 calc R . 
C5 C 0.0786(10) 0.1347(3) 0.1575(13) 0.031(3) Uani 1 d . . 
C6 C 0.1063(9) 0.0842(3) 0.0310(11) 0.029(3) Uani 1 d . . 
C7 C 0.0065(11) 0.0655(4) -0.0029(13) 0.042(4) Uani 1 d . . 
H7 H -0.0400(11) 0.0725(4) 0.0366(13) 0.050 Uiso 1 calc R . 
C8 C -0.0220(11) 0.0369(4) -0.0941(13) 0.045(4) Uani 1 d . . 
H8 H -0.0886(11) 0.0245(4) -0.1175(13) 0.054 Uiso 1 calc R . 
C9 C 0.0477(11) 0.0263(4) -0.1524(13) 0.043(4) Uani 1 d . . 
H9 H 0.0287(11) 0.0074(4) -0.2166(13) 0.052 Uiso 1 calc R . 
C10 C 0.1443(11) 0.0446(4) -0.1116(12) 0.037(3) Uani 1 d . . 
H10 H 0.1929(11) 0.0368(4) -0.1471(12) 0.044 Uiso 1 calc R . 
C11 C 0.1856(12) 0.0693(4) 0.4775(14) 0.044(4) Uani 1 d . . 
H11 H 0.1634(12) 0.0891(4) 0.5181(14) 0.052 Uiso 1 calc R . 
C12 C 0.1604(12) 0.0326(4) 0.4936(14) 0.046(4) Uani 1 d . . 
H12 H 0.1248(12) 0.0269(4) 0.5474(14) 0.056 Uiso 1 calc R . 
C13 C 0.1882(11) 0.0032(4) 0.4289(14) 0.043(4) Uani 1 d . . 
H13 H 0.1702(11) -0.0227(4) 0.4367(14) 0.052 Uiso 1 calc R . 
C14 C 0.2418(10) 0.0126(3) 0.3541(12) 0.032(3) Uani 1 d . . 
H14 H 0.2603(10) -0.0068(3) 0.3089(12) 0.038 Uiso 1 calc R . 
C15 C 0.2695(9) 0.0510(3) 0.3440(11) 0.027(3) Uani 1 d . . 
C16 C 0.3891(9) 0.0428(3) 0.2367(11) 0.025(3) Uani 1 d . . 
C17 C 0.4536(11) 0.0126(4) 0.3109(13) 0.039(3) Uani 1 d . . 
H17 H 0.4411(11) 0.0030(4) 0.3809(13) 0.047 Uiso 1 calc R . 
C18 C 0.5338(10) -0.0029(4) 0.2820(14) 0.041(4) Uani 1 d . . 
H18 H 0.5760(10) -0.0229(4) 0.3324(14) 0.049 Uiso 1 calc R . 
C19 C 0.5540(10) 0.0106(4) 0.1790(13) 0.037(3) Uani 1 d . . 
H19 H 0.6103(10) 0.0007(4) 0.1597(13) 0.044 Uiso 1 calc R . 
C20 C 0.4886(11) 0.0388(3) 0.1079(13) 0.037(3) Uani 1 d . . 
H20 H 0.4996(11) 0.0473(3) 0.0358(13) 0.044 Uiso 1 calc R . 
C21 C 0.4852(12) 0.1080(4) 0.6059(14) 0.042(4) Uani 1 d . . 
H21 H 0.4389(12) 0.1085(4) 0.6492(14) 0.051 Uiso 1 calc R . 
C22 C 0.5898(13) 0.0954(5) 0.6714(14) 0.056(4) Uani 1 d . . 
H22 H 0.6151(13) 0.0889(5) 0.7581(14) 0.068 Uiso 1 calc R . 
C23 C 0.6559(13) 0.0928(4) 0.6041(14) 0.056(5) Uani 1 d . . 
H23 H 0.7267(13) 0.0838(4) 0.6442(14) 0.067 Uiso 1 calc R . 
C24 C 0.6157(10) 0.1037(4) 0.4770(14) 0.045(4) Uani 1 d . . 
H24 H 0.6591(10) 0.1015(4) 0.4303(14) 0.054 Uiso 1 calc R . 
C25 C 0.5120(10) 0.1176(3) 0.4182(13) 0.032(3) Uani 1 d . . 
C26 C 0.5152(9) 0.1394(4) 0.2201(13) 0.031(3) Uani 1 d . . 
C27 C 0.6123(11) 0.1607(4) 0.2684(15) 0.043(4) Uani 1 d . . 
H27 H 0.6455(11) 0.1666(4) 0.3555(15) 0.052 Uiso 1 calc R . 
C28 C 0.6561(12) 0.1725(4) 0.1857(17) 0.055(4) Uani 1 d . . 
H28 H 0.7219(12) 0.1857(4) 0.2168(17) 0.066 Uiso 1 calc R . 
C29 C 0.6050(11) 0.1652(4) 0.0555(15) 0.044(4) Uani 1 d . . 
H29 H 0.6351(11) 0.1731(4) -0.0020(15) 0.053 Uiso 1 calc R . 
C30 C 0.5121(11) 0.1467(4) 0.0163(13) 0.033(3) Uani 1 d . . 
H30 H 0.4759(11) 0.1428(4) -0.0718(13) 0.039 Uiso 1 calc R . 
C31 C 0.3866(11) 0.2162(4) 0.4562(13) 0.036(3) Uani 1 d . . 
H31 H 0.4027(11) 0.2076(4) 0.5397(13) 0.043 Uiso 1 calc R . 
C32 C 0.4144(12) 0.2534(4) 0.4387(13) 0.043(4) Uani 1 d . . 
H32 H 0.4498(12) 0.2697(4) 0.5082(13) 0.051 Uiso 1 calc R . 
C33 C 0.3881(12) 0.2658(4) 0.3145(13) 0.043(4) Uani 1 d . . 
H33 H 0.4032(12) 0.2914(4) 0.2990(13) 0.052 Uiso 1 calc R . 
C34 C 0.3417(11) 0.2418(4) 0.2175(14) 0.040(3) Uani 1 d . . 
H34 H 0.3247(11) 0.2505(4) 0.1339(14) 0.048 Uiso 1 calc R . 
C35 C 0.3176(9) 0.2033(3) 0.2387(12) 0.025(3) Uani 1 d . . 
C36 C 0.2270(9) 0.1810(3) 0.0206(12) 0.026(3) Uani 1 d . . 
C37 C 0.1625(11) 0.2133(4) -0.0329(13) 0.038(3) Uani 1 d . . 
H37 H 0.1549(11) 0.2329(4) 0.0199(13) 0.046 Uiso 1 calc R . 
C38 C 0.1113(12) 0.2160(4) -0.1607(13) 0.049(4) Uani 1 d . . 
H38 H 0.0708(12) 0.2382(4) -0.1969(13) 0.059 Uiso 1 calc R . 
C39 C 0.1179(12) 0.1863(4) -0.2387(14) 0.045(4) Uani 1 d . . 
H39 H 0.0813(12) 0.1877(4) -0.3276(14) 0.054 Uiso 1 calc R . 
C40 C 0.1786(10) 0.1556(4) -0.1827(13) 0.034(3) Uani 1 d . . 
H40 H 0.1823(10) 0.1352(4) -0.2348(13) 0.041 Uiso 1 calc R . 
I1 I 0.72843(8) 0.05502(4) 0.01120(11) 0.0605(3) Uani 1 d . . 
I2 I 0.83401(8) 0.07828(3) 0.27740(10) 0.0502(3) Uani 1 d . . 
I3 I 0.93241(9) 0.10544(4) 0.54075(12) 0.0685(4) Uani 1 d . . 
O1 O 0.9028(15) 0.2303(5) 0.4766(18) 0.045(5) Uiso 0.50 d P . 
O2 O 0.7756(13) 0.2224(5) 0.6350(15) 0.102(5) Uiso 1 d . . 
C41 C 0.6549(19) 0.2157(7) 0.7761(23) 0.093(7) Uiso 1 d . . 
C42 C 0.8166(65) 0.1837(25) 0.7503(100) 0.082(25) Uiso 0.27(3) d P . 
C43 C 0.8151(50) 0.2418(19) 0.7516(64) 0.045(28) Uiso 0.24(6) d P . 
C44 C 0.8278(81) 0.2115(31) 0.8033(85) 0.096(48) Uiso 0.29(10) d P . 
C45 C 0.7414(44) 0.2060(18) 0.8420(61) 0.038(29) Uiso 0.26(8) d P . 
C46 C 0.6707(36) 0.2072(13) 0.6384(43) 0.144(23) Uiso 0.75(7) d P . 
C47 C 0.7246(54) 0.1869(22) 0.7695(76) 0.128(37) Uiso 0.47(10) d P . 
C48 C 0.7727(67) 0.2305(28) 0.8142(70) 0.103(41) Uiso 0.37(11) d P . 
C49 C 0.7996(67) 0.1905(26) 0.6574(97) 0.127(41) Uiso 0.36(8) d P . 
 
loop_ 
 _atom_site_aniso_label 
 _atom_site_aniso_U_11 
 _atom_site_aniso_U_22 
 _atom_site_aniso_U_33 
 _atom_site_aniso_U_23 
 _atom_site_aniso_U_13 
 _atom_site_aniso_U_12 
Cr1 0.0356(12) 0.0230(10) 0.0279(12) 0.0008(9) 0.0169(9) -0.0033(9) 
Cr2A 0.0250(11) 0.0199(13) 0.024(4) 0.001(2) 0.011(2) -0.0001(9) 
Cr2B 0.0250(11) 0.0199(13) 0.024(4) 0.001(2) 0.011(2) -0.0001(9) 
Cr3 0.0308(11) 0.0227(10) 0.0228(12) 0.0037(8) 0.0123(9) 0.0041(8) 
Cl1 0.071(2) 0.039(2) 0.036(2) -0.005(2) 0.036(2) -0.006(2) 
Cl2 0.050(2) 0.035(2) 0.025(2) 0.0016(14) 0.020(2) 0.0117(15) 
N1 0.045(6) 0.021(5) 0.039(7) 0.004(5) 0.031(6) 0.002(5) 
N2 0.034(6) 0.024(5) 0.014(6) -0.001(4) 0.004(4) -0.002(5) 
N3 0.031(6) 0.026(6) 0.021(6) -0.005(5) 0.004(5) 0.002(5) 
N4 0.034(6) 0.024(5) 0.022(6) 0.003(4) 0.016(5) -0.003(5) 
N5 0.034(6) 0.015(5) 0.022(6) -0.005(4) 0.015(5) 0.004(4) 
N6 0.025(5) 0.021(5) 0.019(6) 0.000(4) 0.004(4) 0.006(4) 
N7 0.041(6) 0.029(6) 0.011(6) 0.000(4) 0.002(5) -0.004(5) 
N8 0.031(6) 0.027(5) 0.023(7) 0.001(4) 0.011(5) 0.000(4) 
N9 0.022(5) 0.024(5) 0.033(7) -0.001(5) 0.017(5) 0.005(4) 
N10 0.034(6) 0.024(5) 0.026(7) -0.001(5) 0.015(5) 0.001(4) 
N11 0.035(6) 0.022(5) 0.023(6) 0.003(4) 0.011(5) 0.000(4) 
N12 0.034(6) 0.024(5) 0.024(7) -0.002(4) 0.018(5) 0.003(4) 
C1 0.047(9) 0.030(7) 0.047(9) -0.002(6) 0.031(7) -0.010(6) 
C2 0.053(10) 0.030(8) 0.091(14) -0.006(8) 0.033(10) 0.007(7) 
C3 0.023(8) 0.063(11) 0.080(13) 0.001(10) 0.011(8) 0.009(7) 
C4 0.022(7) 0.042(8) 0.057(10) -0.004(7) 0.009(7) 0.007(6) 
C5 0.035(8) 0.028(7) 0.040(9) -0.004(6) 0.025(7) 0.000(6) 
C6 0.028(7) 0.034(7) 0.019(7) 0.001(6) 0.001(6) -0.002(6) 
C7 0.032(8) 0.054(9) 0.037(9) 0.000(7) 0.012(7) -0.001(7) 
C8 0.037(8) 0.042(8) 0.042(9) -0.006(7) 0.000(7) -0.011(7) 
C9 0.042(9) 0.045(8) 0.038(9) -0.013(7) 0.011(7) 0.009(7) 
C10 0.044(8) 0.033(7) 0.032(8) 0.002(6) 0.013(7) -0.003(6) 
C11 0.059(9) 0.043(9) 0.046(10) -0.001(7) 0.039(8) -0.013(7) 
C12 0.060(10) 0.042(9) 0.040(9) 0.004(7) 0.024(8) -0.011(7) 
C13 0.043(8) 0.040(8) 0.047(10) 0.008(7) 0.017(7) -0.019(7) 
C14 0.043(8) 0.020(7) 0.028(8) -0.004(5) 0.008(6) -0.003(6) 
C15 0.021(6) 0.034(7) 0.023(7) 0.017(6) 0.006(5) 0.003(5) 
C16 0.024(6) 0.021(6) 0.029(8) -0.007(5) 0.010(6) -0.008(5) 
C17 0.052(9) 0.034(8) 0.030(8) 0.005(6) 0.015(7) 0.007(7) 
C18 0.033(8) 0.021(7) 0.051(10) -0.009(6) -0.003(7) 0.009(6) 
C19 0.038(8) 0.038(8) 0.044(9) 0.013(7) 0.027(7) 0.002(6) 
C20 0.049(8) 0.018(6) 0.042(9) -0.007(6) 0.018(7) 0.006(6) 
C21 0.051(9) 0.035(8) 0.042(10) 0.002(7) 0.020(7) 0.007(7) 
C22 0.069(11) 0.067(11) 0.019(9) 0.000(7) 0.003(8) 0.012(9) 
C23 0.048(9) 0.054(10) 0.035(10) 0.009(7) -0.017(8) 0.017(8) 
C24 0.022(7) 0.055(9) 0.059(11) 0.003(8) 0.017(7) 0.003(6) 
C25 0.035(8) 0.022(7) 0.038(9) -0.006(6) 0.014(7) -0.012(6) 
C26 0.021(7) 0.034(7) 0.037(9) 0.003(6) 0.009(6) 0.006(6) 
C27 0.037(8) 0.043(8) 0.051(10) 0.013(7) 0.020(7) -0.007(7) 
C28 0.038(8) 0.052(9) 0.080(14) 0.024(9) 0.029(9) -0.004(7) 
C29 0.040(9) 0.055(9) 0.041(10) 0.019(7) 0.021(7) 0.004(7) 
C30 0.043(8) 0.037(7) 0.028(8) 0.018(6) 0.024(7) 0.013(6) 
C31 0.054(9) 0.029(7) 0.023(8) -0.004(6) 0.013(7) 0.004(6) 
C32 0.066(10) 0.039(8) 0.026(9) -0.006(6) 0.020(7) -0.017(7) 
C33 0.070(10) 0.032(8) 0.030(9) -0.002(7) 0.022(7) -0.013(7) 
C34 0.057(9) 0.026(7) 0.037(9) 0.001(6) 0.019(7) -0.009(6) 
C35 0.034(7) 0.022(6) 0.027(8) 0.006(5) 0.020(6) 0.004(5) 
C36 0.021(6) 0.026(7) 0.030(8) 0.003(6) 0.009(6) 0.002(5) 
C37 0.051(9) 0.031(7) 0.033(9) -0.005(6) 0.017(7) 0.003(6) 
C38 0.059(10) 0.035(8) 0.026(9) 0.009(6) -0.013(7) 0.016(7) 
C39 0.063(10) 0.030(8) 0.034(9) 0.008(7) 0.010(7) 0.014(7) 
C40 0.029(7) 0.047(8) 0.028(9) -0.004(6) 0.013(6) -0.007(6) 
I1 0.0401(6) 0.0884(8) 0.0491(7) 0.0155(6) 0.0131(5) 0.0034(5) 
I2 0.0432(6) 0.0504(6) 0.0567(7) 0.0086(5) 0.0192(5) 0.0001(5) 
I3 0.0599(7) 0.0785(8) 0.0694(8) -0.0174(6) 0.0279(6) -0.0195(6) 
 
_geom_special_details 
; 
 All esds (except the esd in the dihedral angle between two l.s. planes) 
 are estimated using the full covariance matrix.  The cell esds are taken 
 into account individually in the estimation of esds in distances, angles 
 and torsion angles; correlations between esds in cell parameters are only 
 used when they are defined by crystal symmetry.  An approximate (isotropic) 
 treatment of cell esds is used for estimating esds involving l.s. planes. 
; 
 
loop_ 
 _geom_bond_atom_site_label_1 
 _geom_bond_atom_site_label_2 
 _geom_bond_distance 
 _geom_bond_site_symmetry_2 
 _geom_bond_publ_flag 
Cr1 Cr2A 2.078(11) . ? 
Cr1 N7 2.096(10) . ? 
Cr1 N4 2.097(9) . ? 
Cr1 N1 2.099(11) . ? 
Cr1 N10 2.110(10) . ? 
Cr1 Cl1 2.379(4) . ? 
Cr1 Cr2B 2.48(2) . ? 
Cr2A N8 1.976(11) . ? 
Cr2A N2 1.987(11) . ? 
Cr2A N5 2.008(11) . ? 
Cr2A N11 2.015(11) . ? 
Cr2A Cr3 2.494(11) . ? 
Cr2B N2 1.97(3) . ? 
Cr2B N11 1.98(3) . ? 
Cr2B N8 2.00(3) . ? 
Cr2B N5 2.05(3) . ? 
Cr2B Cr3 2.09(2) . ? 
Cr3 N6 2.085(9) . ? 
Cr3 N3 2.089(10) . ? 
Cr3 N9 2.095(9) . ? 
Cr3 N12 2.105(9) . ? 
Cr3 Cl2 2.309(4) . ? 
N1 C1 1.37(2) . ? 
N1 C5 1.38(2) . ? 
N2 C5 1.367(15) . ? 
N2 C6 1.373(15) . ? 
N3 C10 1.35(2) . ? 
N3 C6 1.38(2) . ? 
N4 C15 1.35(2) . ? 
N4 C11 1.36(2) . ? 
N5 C16 1.349(14) . ? 
N5 C15 1.384(15) . ? 
N6 C20 1.35(2) . ? 
N6 C16 1.395(15) . ? 
N7 C21 1.34(2) . ? 
N7 C25 1.37(2) . ? 
N8 C25 1.38(2) . ? 
N8 C26 1.39(2) . ? 
N9 C30 1.356(15) . ? 
N9 C26 1.36(2) . ? 
N10 C31 1.34(2) . ? 
N10 C35 1.354(15) . ? 
N11 C36 1.38(2) . ? 
N11 C35 1.379(15) . ? 
N12 C36 1.341(15) . ? 
N12 C40 1.37(2) . ? 
C1 C2 1.35(2) . ? 
C2 C3 1.37(2) . ? 
C3 C4 1.35(2) . ? 
C4 C5 1.39(2) . ? 
C6 C7 1.41(2) . ? 
C7 C8 1.38(2) . ? 
C8 C9 1.40(2) . ? 
C9 C10 1.36(2) . ? 
C11 C12 1.35(2) . ? 
C12 C13 1.39(2) . ? 
C13 C14 1.36(2) . ? 
C14 C15 1.40(2) . ? 
C16 C17 1.41(2) . ? 
C17 C18 1.36(2) . ? 
C18 C19 1.39(2) . ? 
C19 C20 1.35(2) . ? 
C21 C22 1.39(2) . ? 
C22 C23 1.40(2) . ? 
C23 C24 1.39(2) . ? 
C24 C25 1.39(2) . ? 
C26 C27 1.42(2) . ? 
C27 C28 1.36(2) . ? 
C28 C29 1.40(2) . ? 
C29 C30 1.33(2) . ? 
C31 C32 1.38(2) . ? 
C32 C33 1.39(2) . ? 
C33 C34 1.33(2) . ? 
C34 C35 1.41(2) . ? 
C36 C37 1.40(2) . ? 
C37 C38 1.35(2) . ? 
C38 C39 1.39(2) . ? 
C39 C40 1.34(2) . ? 
I1 I2 2.921(2) . ? 
I2 I3 2.926(2) . ? 
O2 C49 1.15(9) . ? 
O2 C43 1.40(6) . ? 
O2 C46 1.53(4) . ? 
O2 C42 1.81(9) . ? 
O2 C44 1.81(9) . ? 
C41 C45 1.17(6) . ? 
C41 C47 1.40(7) . ? 
C41 C48 1.57(9) . ? 
C41 C46 1.70(5) . ? 
C42 C49 1.02(10) . ? 
C42 C44 1.11(12) . ? 
C42 C47 1.36(10) . ? 
C42 C45 1.89(12) . ? 
C42 C48 1.96(14) . ? 
C42 C43 2.01(11) . ? 
C43 C48 1.15(9) . ? 
C43 C44 1.18(10) . ? 
C43 C49 2.04(11) . ? 
C44 C48 1.04(10) . ? 
C44 C45 1.42(12) . ? 
C44 C47 1.55(11) . ? 
C44 C49 1.72(13) . ? 
C45 C47 1.01(8) . ? 
C45 C48 1.05(9) . ? 
C46 C47 1.55(7) . ? 
C46 C49 1.77(9) . ? 
C47 C48 1.64(12) . ? 
C47 C49 1.93(12) . ? 
 
loop_ 
 _geom_angle_atom_site_label_1 
 _geom_angle_atom_site_label_2 
 _geom_angle_atom_site_label_3 
 _geom_angle 
 _geom_angle_site_symmetry_1 
 _geom_angle_site_symmetry_3 
 _geom_angle_publ_flag 
Cr2A Cr1 N7 86.9(3) . . ? 
Cr2A Cr1 N4 88.2(3) . . ? 
N7 Cr1 N4 88.5(4) . . ? 
Cr2A Cr1 N1 86.9(3) . . ? 
N7 Cr1 N1 173.6(4) . . ? 
N4 Cr1 N1 89.6(4) . . ? 
Cr2A Cr1 N10 86.0(3) . . ? 
N7 Cr1 N10 89.8(4) . . ? 
N4 Cr1 N10 174.1(4) . . ? 
N1 Cr1 N10 91.4(4) . . ? 
Cr2A Cr1 Cl1 176.9(2) . . ? 
N7 Cr1 Cl1 92.9(3) . . ? 
N4 Cr1 Cl1 94.9(3) . . ? 
N1 Cr1 Cl1 93.3(3) . . ? 
N10 Cr1 Cl1 90.9(3) . . ? 
N7 Cr1 Cr2B 87.5(8) . . ? 
N4 Cr1 Cr2B 88.8(8) . . ? 
N1 Cr1 Cr2B 86.4(8) . . ? 
N10 Cr1 Cr2B 85.5(8) . . ? 
Cl1 Cr1 Cr2B 176.3(7) . . ? 
N8 Cr2A N2 169.7(7) . . ? 
N8 Cr2A N5 90.3(5) . . ? 
N2 Cr2A N5 89.8(5) . . ? 
N8 Cr2A N11 90.6(5) . . ? 
N2 Cr2A N11 87.7(5) . . ? 
N5 Cr2A N11 170.4(7) . . ? 
N8 Cr2A Cr1 94.5(5) . . ? 
N2 Cr2A Cr1 95.8(4) . . ? 
N5 Cr2A Cr1 94.2(5) . . ? 
N11 Cr2A Cr1 95.3(4) . . ? 
N8 Cr2A Cr3 84.6(4) . . ? 
N2 Cr2A Cr3 85.2(5) . . ? 
N5 Cr2A Cr3 85.8(4) . . ? 
N11 Cr2A Cr3 84.8(4) . . ? 
Cr1 Cr2A Cr3 179.1(3) . . ? 
N2 Cr2B N11 88.9(14) . . ? 
N2 Cr2B N8 166.9(11) . . ? 
N11 Cr2B N8 90.8(13) . . ? 
N2 Cr2B N5 88.8(13) . . ? 
N11 Cr2B N5 166.5(10) . . ? 
N8 Cr2B N5 88.4(14) . . ? 
N2 Cr2B Cr3 97.3(12) . . ? 
N11 Cr2B Cr3 97.3(11) . . ? 
N8 Cr2B Cr3 95.7(11) . . ? 
N5 Cr2B Cr3 96.2(11) . . ? 
N2 Cr2B Cr1 84.4(8) . . ? 
N11 Cr2B Cr1 84.5(8) . . ? 
N8 Cr2B Cr1 82.6(9) . . ? 
N5 Cr2B Cr1 82.0(8) . . ? 
Cr3 Cr2B Cr1 177.6(17) . . ? 
N6 Cr3 N3 93.0(4) . . ? 
N6 Cr3 Cr2B 84.8(9) . . ? 
N3 Cr3 Cr2B 85.4(9) . . ? 
N6 Cr3 N9 86.5(4) . . ? 
N3 Cr3 N9 171.6(4) . . ? 
Cr2B Cr3 N9 86.2(9) . . ? 
N6 Cr3 N12 168.7(4) . . ? 
N3 Cr3 N12 88.3(4) . . ? 
Cr2B Cr3 N12 84.1(9) . . ? 
N9 Cr3 N12 90.6(4) . . ? 
N6 Cr3 Cl2 95.2(3) . . ? 
N3 Cr3 Cl2 94.5(3) . . ? 
Cr2B Cr3 Cl2 179.9(5) . . ? 
N9 Cr3 Cl2 93.9(3) . . ? 
N12 Cr3 Cl2 95.9(3) . . ? 
N6 Cr3 Cr2A 83.7(3) . . ? 
N3 Cr3 Cr2A 85.5(3) . . ? 
N9 Cr3 Cr2A 86.1(3) . . ? 
N12 Cr3 Cr2A 85.2(3) . . ? 
Cl2 Cr3 Cr2A 179.0(2) . . ? 
C1 N1 C5 117.9(11) . . ? 
C1 N1 Cr1 122.6(9) . . ? 
C5 N1 Cr1 119.5(8) . . ? 
C5 N2 C6 121.4(10) . . ? 
C5 N2 Cr2B 124.8(10) . . ? 
C6 N2 Cr2B 113.7(10) . . ? 
C5 N2 Cr2A 115.5(8) . . ? 
C6 N2 Cr2A 123.1(8) . . ? 
C10 N3 C6 118.2(11) . . ? 
C10 N3 Cr3 121.6(9) . . ? 
C6 N3 Cr3 120.1(8) . . ? 
C15 N4 C11 117.6(10) . . ? 
C15 N4 Cr1 119.1(7) . . ? 
C11 N4 Cr1 123.3(9) . . ? 
C16 N5 C15 123.2(10) . . ? 
C16 N5 Cr2A 119.9(8) . . ? 
C15 N5 Cr2A 116.1(8) . . ? 
C16 N5 Cr2B 111.0(10) . . ? 
C15 N5 Cr2B 125.7(10) . . ? 
C20 N6 C16 118.5(10) . . ? 
C20 N6 Cr3 121.1(8) . . ? 
C16 N6 Cr3 120.3(7) . . ? 
C21 N7 C25 119.0(11) . . ? 
C21 N7 Cr1 121.2(9) . . ? 
C25 N7 Cr1 119.6(8) . . ? 
C25 N8 C26 120.1(10) . . ? 
C25 N8 Cr2A 115.8(8) . . ? 
C26 N8 Cr2A 124.1(8) . . ? 
C25 N8 Cr2B 125.7(10) . . ? 
C26 N8 Cr2B 113.7(10) . . ? 
C30 N9 C26 117.8(11) . . ? 
C30 N9 Cr3 122.4(9) . . ? 
C26 N9 Cr3 119.8(8) . . ? 
C31 N10 C35 119.3(10) . . ? 
C31 N10 Cr1 121.4(8) . . ? 
C35 N10 Cr1 119.2(8) . . ? 
C36 N11 C35 123.8(10) . . ? 
C36 N11 Cr2B 111.9(10) . . ? 
C35 N11 Cr2B 124.3(10) . . ? 
C36 N11 Cr2A 121.6(8) . . ? 
C35 N11 Cr2A 114.4(8) . . ? 
C36 N12 C40 118.2(10) . . ? 
C36 N12 Cr3 121.6(8) . . ? 
C40 N12 Cr3 120.0(8) . . ? 
C2 C1 N1 123.3(14) . . ? 
C1 C2 C3 118.2(14) . . ? 
C4 C3 C2 120.6(14) . . ? 
C3 C4 C5 120.8(14) . . ? 
N2 C5 N1 113.7(11) . . ? 
N2 C5 C4 126.8(12) . . ? 
N1 C5 C4 119.0(11) . . ? 
N2 C6 N3 114.8(10) . . ? 
N2 C6 C7 125.2(12) . . ? 
N3 C6 C7 119.9(11) . . ? 
C8 C7 C6 119.5(13) . . ? 
C7 C8 C9 120.4(13) . . ? 
C10 C9 C8 116.9(13) . . ? 
N3 C10 C9 125.0(13) . . ? 
C12 C11 N4 123.9(13) . . ? 
C11 C12 C13 118.7(13) . . ? 
C14 C13 C12 118.7(12) . . ? 
C13 C14 C15 120.5(12) . . ? 
N4 C15 N5 113.9(10) . . ? 
N4 C15 C14 120.5(11) . . ? 
N5 C15 C14 125.3(12) . . ? 
N5 C16 N6 115.5(10) . . ? 
N5 C16 C17 126.1(11) . . ? 
N6 C16 C17 117.9(11) . . ? 
C18 C17 C16 120.6(13) . . ? 
C17 C18 C19 121.0(12) . . ? 
C20 C19 C18 116.7(12) . . ? 
N6 C20 C19 125.2(13) . . ? 
N7 C21 C22 123.4(14) . . ? 
C21 C22 C23 117.8(14) . . ? 
C24 C23 C22 119.0(14) . . ? 
C25 C24 C23 120.6(14) . . ? 
N7 C25 N8 112.3(11) . . ? 
N7 C25 C24 120.1(13) . . ? 
N8 C25 C24 127.3(12) . . ? 
N9 C26 N8 114.5(10) . . ? 
N9 C26 C27 120.0(12) . . ? 
N8 C26 C27 125.2(12) . . ? 
C28 C27 C26 118.5(14) . . ? 
C27 C28 C29 121.0(14) . . ? 
C30 C29 C28 117.2(13) . . ? 
C29 C30 N9 125.3(13) . . ? 
N10 C31 C32 122.8(12) . . ? 
C31 C32 C33 117.7(13) . . ? 
C34 C33 C32 120.3(13) . . ? 
C33 C34 C35 120.8(13) . . ? 
N10 C35 N11 114.4(10) . . ? 
N10 C35 C34 118.9(11) . . ? 
N11 C35 C34 126.6(11) . . ? 
N12 C36 N11 114.4(10) . . ? 
N12 C36 C37 120.2(11) . . ? 
N11 C36 C37 125.3(11) . . ? 
C38 C37 C36 119.7(12) . . ? 
C37 C38 C39 120.5(12) . . ? 
C40 C39 C38 117.5(13) . . ? 
C39 C40 N12 123.8(13) . . ? 
I1 I2 I3 176.83(5) . . ? 
C49 O2 C43 106.3(60) . . ? 
C49 O2 C46 81.5(46) . . ? 
C43 O2 C46 98.8(34) . . ? 
C49 O2 C42 31.5(50) . . ? 
C43 O2 C42 76.6(44) . . ? 
C46 O2 C42 75.6(33) . . ? 
C49 O2 C44 66.7(60) . . ? 
C43 O2 C44 40.8(40) . . ? 
C46 O2 C44 83.2(37) . . ? 
C42 O2 C44 35.9(39) . . ? 
C45 C41 C47 45.5(35) . . ? 
C45 C41 C48 42.1(37) . . ? 
C47 C41 C48 67.0(50) . . ? 
C45 C41 C46 95.0(38) . . ? 
C47 C41 C46 59.4(33) . . ? 
C48 C41 C46 80.0(35) . . ? 
C49 C42 C44 107.1(100) . . ? 
C49 C42 C47 107.6(95) . . ? 
C44 C42 C47 77.2(86) . . ? 
C49 C42 O2 36.1(63) . . ? 
C44 C42 O2 72.2(68) . . ? 
C47 C42 O2 91.0(54) . . ? 
C49 C42 C45 122.1(89) . . ? 
C44 C42 C45 48.3(70) . . ? 
C47 C42 C45 31.2(43) . . ? 
O2 C42 C45 91.3(42) . . ? 
C49 C42 C48 102.6(87) . . ? 
C44 C42 C48 23.4(62) . . ? 
C47 C42 C48 55.8(56) . . ? 
O2 C42 C48 67.0(38) . . ? 
C45 C42 C48 31.6(31) . . ? 
C49 C42 C43 77.2(78) . . ? 
C44 C42 C43 29.9(58) . . ? 
C47 C42 C43 84.5(58) . . ? 
O2 C42 C43 42.6(26) . . ? 
C45 C42 C43 65.1(40) . . ? 
C48 C42 C43 33.6(31) . . ? 
C48 C43 C44 52.8(55) . . ? 
C48 C43 O2 109.3(63) . . ? 
C44 C43 O2 88.6(63) . . ? 
C48 C43 C42 70.8(65) . . ? 
C44 C43 C42 28.0(55) . . ? 
O2 C43 C42 60.8(39) . . ? 
C48 C43 C49 93.3(65) . . ? 
C44 C43 C49 57.1(59) . . ? 
O2 C43 C49 32.7(32) . . ? 
C42 C43 C49 29.1(30) . . ? 
C48 C44 C42 131.3(100) . . ? 
C48 C44 C43 61.8(75) . . ? 
C42 C44 C43 122.1(100) . . ? 
C48 C44 C45 47.6(67) . . ? 
C42 C44 C45 95.8(86) . . ? 
C43 C44 C45 107.3(88) . . ? 
C48 C44 C47 75.8(86) . . ? 
C42 C44 C47 58.4(66) . . ? 
C43 C44 C47 114.9(83) . . ? 
C45 C44 C47 39.6(40) . . ? 
C48 C44 C49 119.1(90) . . ? 
C42 C44 C49 34.6(60) . . ? 
C43 C44 C49 87.6(68) . . ? 
C45 C44 C49 110.5(67) . . ? 
C47 C44 C49 72.0(58) . . ? 
C48 C44 O2 89.7(76) . . ? 
C42 C44 O2 71.9(69) . . ? 
C43 C44 O2 50.6(46) . . ? 
C45 C44 O2 109.4(61) . . ? 
C47 C44 O2 84.9(50) . . ? 
C49 C44 O2 37.9(36) . . ? 
C47 C45 C48 105.4(87) . . ? 
C47 C45 C41 79.2(58) . . ? 
C48 C45 C41 89.8(62) . . ? 
C47 C45 C44 77.4(69) . . ? 
C48 C45 C44 46.9(57) . . ? 
C41 C45 C44 120.3(62) . . ? 
C47 C45 C42 43.8(52) . . ? 
C48 C45 C42 77.9(71) . . ? 
C41 C45 C42 112.6(53) . . ? 
C44 C45 C42 35.9(47) . . ? 
O2 C46 C47 95.1(37) . . ? 
O2 C46 C41 115.0(28) . . ? 
C47 C46 C41 50.7(33) . . ? 
O2 C46 C49 39.9(30) . . ? 
C47 C46 C49 70.5(44) . . ? 
C41 C46 C49 114.9(42) . . ? 
C45 C47 C42 105.0(82) . . ? 
C45 C47 C41 55.3(50) . . ? 
C42 C47 C41 139.0(67) . . ? 
C45 C47 C46 111.3(72) . . ? 
C42 C47 C46 89.8(61) . . ? 
C41 C47 C46 69.9(35) . . ? 
C45 C47 C44 63.1(71) . . ? 
C42 C47 C44 44.4(53) . . ? 
C41 C47 C44 99.2(67) . . ? 
C46 C47 C44 91.7(53) . . ? 
C45 C47 C48 38.1(51) . . ? 
C42 C47 C48 81.2(62) . . ? 
C41 C47 C48 61.5(46) . . ? 
C46 C47 C48 82.2(47) . . ? 
C44 C47 C48 37.8(43) . . ? 
C45 C47 C49 119.5(73) . . ? 
C42 C47 C49 30.3(46) . . ? 
C41 C47 C49 122.4(51) . . ? 
C46 C47 C49 60.1(39) . . ? 
C44 C47 C49 58.0(51) . . ? 
C48 C47 C49 84.2(52) . . ? 
C44 C48 C45 85.5(97) . . ? 
C44 C48 C43 65.3(73) . . ? 
C45 C48 C43 145.6(100) . . ? 
C44 C48 C41 117.7(91) . . ? 
C45 C48 C41 48.1(46) . . ? 
C43 C48 C41 130.1(67) . . ? 
C44 C48 C47 66.4(76) . . ? 
C45 C48 C47 36.5(48) . . ? 
C43 C48 C47 110.8(74) . . ? 
C41 C48 C47 51.5(35) . . ? 
C44 C48 C42 25.3(62) . . ? 
C45 C48 C42 70.5(69) . . ? 
C43 C48 C42 75.6(63) . . ? 
C41 C48 C42 93.1(49) . . ? 
C47 C48 C42 43.0(38) . . ? 
C42 C49 O2 112.4(100) . . ? 
C42 C49 C44 38.3(67) . . ? 
O2 C49 C44 75.3(61) . . ? 
C42 C49 C46 90.7(80) . . ? 
O2 C49 C46 58.6(41) . . ? 
C44 C49 C46 79.3(56) . . ? 
C42 C49 C47 42.1(64) . . ? 
O2 C49 C47 91.8(59) . . ? 
C44 C49 C47 50.0(47) . . ? 
C46 C49 C47 49.4(31) . . ? 
C42 C49 C43 73.6(76) . . ? 
O2 C49 C43 41.0(39) . . ? 
C44 C49 C43 35.3(39) . . ? 
C46 C49 C43 70.9(40) . . ? 
C47 C49 C43 71.2(45) . . ? 
 
loop_ 
 _geom_torsion_atom_site_label_1 
 _geom_torsion_atom_site_label_2 
 _geom_torsion_atom_site_label_3 
 _geom_torsion_atom_site_label_4 
 _geom_torsion 
 _geom_torsion_site_symmetry_1 
 _geom_torsion_site_symmetry_2 
 _geom_torsion_site_symmetry_3 
 _geom_torsion_site_symmetry_4 
 _geom_torsion_publ_flag 
 N1 Cr1 Cr3 N3 -44.8(4) . . . . y
 N4 Cr1 Cr3 N6 -48.6(4) . . . . y 
 N7 Cr1 Cr3 N9 -47.0(4) . . . . y
 N10 Cr1 Cr3 N12 -47.8(4) . . . . y
 
_refine_diff_density_max    1.063 
_refine_diff_density_min   -0.781 
_refine_diff_density_rms    0.162 
 
#===END

data_cmpd_5
 
_audit_creation_method            SHELXL 

_chemical_formula_structural      '[Cr3(N3C10H8)4Cl2][PF6].2(CH2Cl2)'
_chemical_formula_sum             'C42 H36 Cl3.50 Cr3 F6 N12 P' 
_chemical_formula_weight          1133.87 
_chemical_compound_source         synthesis
 
loop_ 
 _atom_type_symbol 
 _atom_type_description 
 _atom_type_scat_dispersion_real 
 _atom_type_scat_dispersion_imag 
 _atom_type_scat_source 
 'C'  'C'   0.0033   0.0016 
 'International Tables Vol C Tables 4.2.6.8 and 6.1.1.4' 
 'H'  'H'   0.0000   0.0000 
 'International Tables Vol C Tables 4.2.6.8 and 6.1.1.4' 
 'N'  'N'   0.0061   0.0033 
 'International Tables Vol C Tables 4.2.6.8 and 6.1.1.4' 
 'Cl'  'Cl'   0.1484   0.1585 
 'International Tables Vol C Tables 4.2.6.8 and 6.1.1.4' 
 'Cr'  'Cr'   0.3209   0.6236 
 'International Tables Vol C Tables 4.2.6.8 and 6.1.1.4' 
 'P'  'P'   0.1023   0.0942 
 'International Tables Vol C Tables 4.2.6.8 and 6.1.1.4' 
 'F'  'F'   0.0171   0.0103 
 'International Tables Vol C Tables 4.2.6.8 and 6.1.1.4' 
 
_symmetry_cell_setting            monoclinic
_symmetry_space_group_name_H-M    P2(1)/n
 
loop_ 
 _symmetry_equiv_pos_as_xyz 
 'x, y, z' 
 '-x+1/2, y+1/2, -z+1/2' 
 '-x, -y, -z' 
 'x-1/2, -y-1/2, z-1/2' 
 
_cell_length_a                    11.545(2) 
_cell_length_b                    21.426(4) 
_cell_length_c                    20.238(4) 
_cell_angle_alpha                 90.00 
_cell_angle_beta                  92.78(3) 
_cell_angle_gamma                 90.00 
_cell_volume                      5000.5(17) 
_cell_formula_units_Z             4 
_cell_measurement_temperature     213(2) 
_cell_measurement_reflns_used     77
_cell_measurement_theta_min       7.3
_cell_measurement_theta_max       16.4
 
_exptl_crystal_description        plate
_exptl_crystal_colour             black
_exptl_crystal_size_max           0.4
_exptl_crystal_size_mid           0.4
_exptl_crystal_size_min           0.02
_exptl_crystal_density_meas       'not measured'
_exptl_crystal_density_diffrn     1.506 
_exptl_crystal_density_method     ? 
_exptl_crystal_F_000              2290 
_exptl_absorpt_coefficient_mu     0.926 
_exptl_absorpt_correction_type    none
_exptl_absorpt_correction_T_min   ? 
_exptl_absorpt_correction_T_max   ? 
 
_diffrn_ambient_temperature       213(2) 
_diffrn_radiation_wavelength      0.71073 
_diffrn_radiation_type            MoK\a 
_diffrn_radiation_source          'fine-focus sealed tube' 
_diffrn_radiation_monochromator   graphite 
_diffrn_measurement_device        'Nonius FAST'
_diffrn_measurement_method        'Ellipsoid mask fitting'
_diffrn_standards_number          'None (area detector)'
_diffrn_standards_interval_count  ? 
_diffrn_standards_interval_time   ? 
_diffrn_standards_decay_%         ? 
_diffrn_reflns_number             18460 
_diffrn_reflns_av_R_equivalents   0.0874 
_diffrn_reflns_av_sigmaI/netI     0.0687 
_diffrn_reflns_limit_h_min        -12 
_diffrn_reflns_limit_h_max        10 
_diffrn_reflns_limit_k_min        -23 
_diffrn_reflns_limit_k_max        22 
_diffrn_reflns_limit_l_min        -20 
_diffrn_reflns_limit_l_max        21 
_diffrn_reflns_theta_min          2.15 
_diffrn_reflns_theta_max          22.63 
_reflns_number_total              6289 
_reflns_number_observed           4292 
_reflns_observed_criterion        >2sigma(I) 
 
_computing_data_collection        MADNES
_computing_cell_refinement        MADNES
_computing_data_reduction         PROCOR
_computing_structure_solution     'SHELXS-86 (Sheldrick, 1990)' 
_computing_structure_refinement   'SHELXL-93 (Sheldrick, 1993)' 
_computing_molecular_graphics     'XP (Siemens, 1996)'
_computing_publication_material   'SHELXL-93 (Sheldrick, 1993)' 
 
_refine_special_details 
; 
 Refinement on F^2^ for ALL reflections except for 29 with very negative F^2^ 
 or flagged by the user for potential systematic errors.  Weighted R-factors 
 wR and all goodnesses of fit S are based on F^2^, conventional R-factors R 
 are based on F, with F set to zero for negative F^2^. The observed criterion 
 of F^2^ > 2sigma(F^2^) is used only for calculating _R_factor_obs etc. and is 
 not relevant to the choice of reflections for refinement.  R-factors based 
 on F^2^ are statistically about twice as large as those based on F, and R- 
 factors based on ALL data will be even larger. 
; 
 
_refine_ls_structure_factor_coef  Fsqd  
_refine_ls_matrix_type            full 
_refine_ls_weighting_scheme 
 'calc w=1/[\s^2^(Fo^2^)+(0.1000P)^2^+45.0000P] where P=(Fo^2^+2Fc^2^)/3' 
_atom_sites_solution_primary      direct 
_atom_sites_solution_secondary    difmap 
_atom_sites_solution_hydrogens    geom 
_refine_ls_hydrogen_treatment     noref
_refine_ls_extinction_method      none 
_refine_ls_extinction_coef        ? 
_refine_ls_number_reflns          6260 
_refine_ls_number_parameters      663 
_refine_ls_number_restraints      33 
_refine_ls_R_factor_all           0.1370 
_refine_ls_R_factor_obs           0.0899 
_refine_ls_wR_factor_all          0.2680 
_refine_ls_wR_factor_obs          0.2094 
_refine_ls_goodness_of_fit_all    1.114 
_refine_ls_goodness_of_fit_obs    1.100 
_refine_ls_restrained_S_all       1.145 
_refine_ls_restrained_S_obs       1.107 
_refine_ls_shift/esd_max          -0.070 
_refine_ls_shift/esd_mean         0.002 
 
loop_ 
 _atom_site_label 
 _atom_site_type_symbol 
 _atom_site_fract_x 
 _atom_site_fract_y 
 _atom_site_fract_z 
 _atom_site_U_iso_or_equiv 
 _atom_site_thermal_displace_type 
 _atom_site_occupancy 
 _atom_site_calc_flag 
 _atom_site_refinement_flags 
 _atom_site_disorder_group 
Cr1 Cr 0.22478(15) 0.20514(7) 0.37430(8) 0.0381(5) Uani 1 d . . 
Cr2A Cr 0.2032(8) 0.2402(7) 0.2783(9) 0.036(2) Uani 0.69(5) d P 1 
Cr2B Cr 0.2023(21) 0.2509(10) 0.2618(11) 0.036(2) Uani 0.31(5) d P 2 
Cr3 Cr 0.17979(15) 0.28129(7) 0.16387(8) 0.0365(5) Uani 1 d . . 
Cl1 Cl 0.2434(3) 0.16195(15) 0.4824(2) 0.0641(9) Uani 1 d . . 
Cl2 Cl 0.1552(3) 0.3182(2) 0.0563(2) 0.0626(9) Uani 1 d . . 
N1 N 0.1487(8) 0.1231(4) 0.3367(4) 0.042(2) Uani 1 d . . 
N2 N 0.0744(7) 0.1836(4) 0.2516(4) 0.038(2) Uani 1 d . . 
N3 N 0.0106(7) 0.2483(4) 0.1662(4) 0.038(2) Uani 1 d . . 
N4 N 0.3863(7) 0.1717(4) 0.3470(4) 0.037(2) Uani 1 d . . 
N5 N 0.3150(7) 0.1813(4) 0.2402(4) 0.037(2) Uani 1 d . . 
N6 N 0.2328(8) 0.1917(4) 0.1352(4) 0.042(2) Uani 1 d . . 
N7 N 0.3040(8) 0.2893(4) 0.4011(4) 0.041(2) Uani 1 d . . 
N8 N 0.3295(7) 0.3050(4) 0.2906(4) 0.036(2) Uani 1 d . . 
N9 N 0.3519(7) 0.3113(4) 0.1783(4) 0.035(2) Uani 1 d . . 
N10 N 0.0557(8) 0.2400(4) 0.3870(4) 0.043(2) Uani 1 d . . 
N11 N 0.0846(7) 0.3056(3) 0.2994(4) 0.036(2) Uani 1 d . . 
N12 N 0.1209(7) 0.3619(4) 0.2062(4) 0.037(2) Uani 1 d . . 
C1 C 0.1660(10) 0.0655(5) 0.3669(6) 0.053(3) Uani 1 d . . 
H1 H 0.2145(10) 0.0631(5) 0.4055(6) 0.064 Uiso 1 calc R . 
C2 C 0.1150(11) 0.0124(5) 0.3424(7) 0.062(4) Uani 1 d . . 
H2 H 0.1298(11) -0.0261(5) 0.3636(7) 0.075 Uiso 1 calc R . 
C3 C 0.0421(12) 0.0149(5) 0.2870(6) 0.061(3) Uani 1 d . . 
H3 H 0.0043(12) -0.0214(5) 0.2711(6) 0.073 Uiso 1 calc R . 
C4 C 0.0245(11) 0.0715(5) 0.2545(6) 0.060(3) Uani 1 d . . 
H4 H -0.0227(11) 0.0737(5) 0.2154(6) 0.072 Uiso 1 calc R . 
C5 C 0.0783(9) 0.1254(4) 0.2811(5) 0.041(3) Uani 1 d . . 
C6 C -0.0164(9) 0.2024(5) 0.2106(5) 0.041(3) Uani 1 d . . 
C7 C -0.1328(9) 0.1844(5) 0.2170(5) 0.043(3) Uani 1 d . . 
H7 H -0.1510(9) 0.1542(5) 0.2486(5) 0.052 Uiso 1 calc R . 
C8 C -0.2180(11) 0.2101(5) 0.1782(6) 0.057(3) Uani 1 d . . 
H8 H -0.2952(11) 0.1973(5) 0.1821(6) 0.069 Uiso 1 calc R . 
C9 C -0.1915(10) 0.2554(6) 0.1328(5) 0.055(3) Uani 1 d . . 
H9 H -0.2502(10) 0.2735(6) 0.1053(5) 0.066 Uiso 1 calc R . 
C10 C -0.0794(9) 0.2733(5) 0.1285(5) 0.041(3) Uani 1 d . . 
H10 H -0.0626(9) 0.3047(5) 0.0979(5) 0.050 Uiso 1 calc R . 
C11 C 0.4750(10) 0.1600(5) 0.3920(6) 0.047(3) Uani 1 d . . 
H11 H 0.4640(10) 0.1687(5) 0.4368(6) 0.056 Uiso 1 calc R . 
C12 C 0.5765(11) 0.1367(5) 0.3757(6) 0.056(3) Uani 1 d . . 
H12 H 0.6341(11) 0.1282(5) 0.4089(6) 0.067 Uiso 1 calc R . 
C13 C 0.5980(10) 0.1249(5) 0.3099(6) 0.051(3) Uani 1 d . . 
H13 H 0.6701(10) 0.1092(5) 0.2980(6) 0.062 Uiso 1 calc R . 
C14 C 0.5102(10) 0.1370(5) 0.2621(6) 0.044(3) Uani 1 d . . 
H14 H 0.5216(10) 0.1290(5) 0.2172(6) 0.053 Uiso 1 calc R . 
C15 C 0.4045(10) 0.1612(4) 0.2818(5) 0.040(3) Uani 1 d . . 
C16 C 0.2901(9) 0.1546(5) 0.1785(5) 0.039(3) Uani 1 d . . 
C17 C 0.3129(10) 0.0918(5) 0.1635(6) 0.052(3) Uani 1 d . . 
H17 H 0.3541(10) 0.0662(5) 0.1942(6) 0.062 Uiso 1 calc R . 
C18 C 0.2740(11) 0.0686(6) 0.1033(7) 0.066(4) Uani 1 d . . 
H18 H 0.2853(11) 0.0264(6) 0.0928(7) 0.079 Uiso 1 calc R . 
C19 C 0.2175(13) 0.1084(6) 0.0579(7) 0.072(4) Uani 1 d . . 
H19 H 0.1946(13) 0.0933(6) 0.0156(7) 0.087 Uiso 1 calc R . 
C20 C 0.1948(11) 0.1691(6) 0.0740(6) 0.058(3) Uani 1 d . . 
H20 H 0.1537(11) 0.1951(6) 0.0437(6) 0.069 Uiso 1 calc R . 
C21 C 0.3154(10) 0.3066(5) 0.4658(5) 0.049(3) Uani 1 d . . 
H21 H 0.2875(10) 0.2799(5) 0.4982(5) 0.059 Uiso 1 calc R . 
C22 C 0.3673(11) 0.3631(6) 0.4856(6) 0.056(3) Uani 1 d . . 
H22 H 0.3761(11) 0.3737(6) 0.5307(6) 0.067 Uiso 1 calc R . 
C23 C 0.4053(11) 0.4026(5) 0.4374(6) 0.055(3) Uani 1 d . . 
H23 H 0.4386(11) 0.4413(5) 0.4493(6) 0.066 Uiso 1 calc R . 
C24 C 0.3946(9) 0.3855(5) 0.3729(6) 0.046(3) Uani 1 d . . 
H24 H 0.4198(9) 0.4127(5) 0.3401(6) 0.055 Uiso 1 calc R . 
C25 C 0.3460(9) 0.3275(5) 0.3549(5) 0.038(3) Uani 1 d . . 
C26 C 0.3992(9) 0.3216(4) 0.2415(5) 0.036(3) Uani 1 d . . 
C27 C 0.5153(9) 0.3409(5) 0.2499(5) 0.042(3) Uani 1 d . . 
H27 H 0.5495(9) 0.3464(5) 0.2926(5) 0.051 Uiso 1 calc R . 
C28 C 0.5781(10) 0.3516(5) 0.1955(6) 0.051(3) Uani 1 d . . 
H28 H 0.6552(10) 0.3655(5) 0.2010(6) 0.062 Uiso 1 calc R . 
C29 C 0.5300(10) 0.3422(5) 0.1331(6) 0.051(3) Uani 1 d . . 
H29 H 0.5734(10) 0.3493(5) 0.0957(6) 0.061 Uiso 1 calc R . 
C30 C 0.4186(10) 0.3224(5) 0.1264(6) 0.048(3) Uani 1 d . . 
H30 H 0.3860(10) 0.3161(5) 0.0835(6) 0.058 Uiso 1 calc R . 
C31 C -0.0139(11) 0.2121(5) 0.4298(6) 0.049(3) Uani 1 d . . 
H31 H 0.0180(11) 0.1805(5) 0.4573(6) 0.059 Uiso 1 calc R . 
C32 C -0.1281(12) 0.2271(6) 0.4354(6) 0.063(4) Uani 1 d . . 
H32 H -0.1735(12) 0.2068(6) 0.4662(6) 0.075 Uiso 1 calc R . 
C33 C -0.1749(11) 0.2734(5) 0.3940(6) 0.055(3) Uani 1 d . . 
H33 H -0.2529(11) 0.2852(5) 0.3970(6) 0.065 Uiso 1 calc R . 
C34 C -0.1074(10) 0.3019(5) 0.3489(5) 0.047(3) Uani 1 d . . 
H34 H -0.1396(10) 0.3326(5) 0.3203(5) 0.057 Uiso 1 calc R . 
C35 C 0.0106(10) 0.2850(4) 0.3452(5) 0.039(3) Uani 1 d . . 
C36 C 0.0716(9) 0.3612(4) 0.2650(5) 0.038(3) Uani 1 d . . 
C37 C 0.0160(10) 0.4144(5) 0.2908(5) 0.046(3) Uani 1 d . . 
H37 H -0.0160(10) 0.4130(5) 0.3326(5) 0.055 Uiso 1 calc R . 
C38 C 0.0100(11) 0.4684(5) 0.2530(6) 0.054(3) Uani 1 d . . 
H38 H -0.0321(11) 0.5030(5) 0.2671(6) 0.065 Uiso 1 calc R . 
C39 C 0.0659(11) 0.4707(5) 0.1951(6) 0.059(3) Uani 1 d . . 
H39 H 0.0689(11) 0.5082(5) 0.1712(6) 0.070 Uiso 1 calc R . 
C40 C 0.1186(10) 0.4170(5) 0.1717(6) 0.050(3) Uani 1 d . . 
H40 H 0.1537(10) 0.4187(5) 0.1308(6) 0.060 Uiso 1 calc R . 
P P 0.2151(3) 0.0139(2) 0.8666(2) 0.0664(10) Uani 1 d . . 
F1 F 0.2258(11) 0.0309(8) 0.7933(5) 0.183(7) Uani 1 d . . 
F2 F 0.2217(9) -0.0575(4) 0.8515(6) 0.132(4) Uani 1 d . . 
F3 F 0.2031(9) -0.0013(4) 0.9421(4) 0.101(3) Uani 1 d . . 
F4 F 0.2025(11) 0.0855(4) 0.8847(6) 0.140(5) Uani 1 d . . 
F5 F 0.3494(8) 0.0161(5) 0.8798(5) 0.132(4) Uani 1 d . . 
F6 F 0.0802(7) 0.0125(4) 0.8541(5) 0.096(3) Uani 1 d . . 
C41A C -0.0210(54) 0.3988(22) 0.5285(25) 0.012(20) Uiso 0.12(2) d PD 1 
Cl3A Cl -0.0019(59) 0.3286(23) 0.5702(23) 0.084(19) Uiso 0.12(2) d PD 1 
Cl4A Cl 0.0505(53) 0.4083(15) 0.4581(15) 0.044(11) Uiso 0.12(2) d PD 1 
C41B C 0.0767(44) 0.3927(14) 0.5504(17) 0.064(16) Uiso 0.37(2) d PD 2 
Cl4B Cl 0.0084(18) 0.4194(7) 0.4768(10) 0.105(6) Uiso 0.37(2) d PD 2 
Cl3B Cl 0.0359(19) 0.3177(8) 0.5694(9) 0.063(6) Uiso 0.37(2) d PD 2 
C41C C 0.0648(59) 0.4012(17) 0.5400(14) 0.111(20) Uiso 0.51(3) d PD 3 
Cl3C Cl 0.0260(22) 0.3257(8) 0.5618(9) 0.086(8) Uiso 0.51(3) d PD 3 
Cl4C Cl 0.0919(17) 0.4105(5) 0.4578(5) 0.089(4) Uiso 0.51(3) d PD 3 
C42A C 0.8499(66) -0.0055(31) 0.4407(21) 0.105(10) Uiso 0.259(14) d PD 1 
Cl5A Cl 0.8101(18) 0.0528(8) 0.4929(8) 0.083(6) Uiso 0.259(14) d PD 1 
Cl6A Cl 0.7758(14) -0.0099(7) 0.3655(7) 0.065(5) Uiso 0.259(14) d PD 1 
C42B C 0.8332(40) -0.0146(16) 0.4382(25) 0.105(10) Uiso 0.43(2) d PD 2 
Cl5B Cl 0.8754(19) 0.0549(8) 0.4722(9) 0.157(7) Uiso 0.43(2) d PD 2 
Cl6B Cl 0.7225(17) -0.0280(8) 0.3828(9) 0.135(6) Uiso 0.43(2) d PD 2 
C43 C 0.5643(64) -0.0304(36) 0.4758(36) 0.128(24) Uiso 0.315(10) d P 3 
Cl7A Cl 0.5000 0.0000 0.5000 0.153(21) Uiso 0.158(5) d SP 3 
Cl7B Cl 0.7337(55) 0.0197(27) 0.4770(28) 0.190(20) Uiso 0.158(5) d P 3 
Cl7C Cl 0.6045(19) 0.0056(11) 0.5040(11) 0.143(8) Uiso 0.315(10) d P 3 
Cl7D Cl 0.6740(75) -0.0440(39) 0.4303(46) 0.141(26) Uiso 0.079(2) d P 3 
 
loop_ 
 _atom_site_aniso_label 
 _atom_site_aniso_U_11 
 _atom_site_aniso_U_22 
 _atom_site_aniso_U_33 
 _atom_site_aniso_U_23 
 _atom_site_aniso_U_13 
 _atom_site_aniso_U_12 
Cr1 0.0496(11) 0.0285(9) 0.0360(10) 0.0008(7) 0.0000(8) -0.0039(8) 
Cr2A 0.0444(11) 0.021(3) 0.042(5) -0.002(3) 0.002(3) -0.002(2) 
Cr2B 0.0444(11) 0.021(3) 0.042(5) -0.002(3) 0.002(3) -0.002(2) 
Cr3 0.0469(11) 0.0296(9) 0.0330(9) 0.0000(7) 0.0016(8) 0.0021(7) 
Cl1 0.081(2) 0.055(2) 0.056(2) -0.0030(15) -0.001(2) -0.003(2) 
Cl2 0.068(2) 0.067(2) 0.054(2) -0.001(2) 0.009(2) 0.003(2) 
N1 0.058(6) 0.028(5) 0.039(5) -0.002(4) 0.000(5) -0.003(4) 
N2 0.047(5) 0.030(5) 0.037(5) -0.001(4) -0.004(4) -0.009(4) 
N3 0.053(6) 0.032(5) 0.028(4) 0.004(4) -0.002(4) -0.003(4) 
N4 0.046(5) 0.031(5) 0.035(5) -0.003(4) 0.000(4) -0.002(4) 
N5 0.053(6) 0.028(4) 0.029(5) 0.001(4) -0.001(4) 0.002(4) 
N6 0.051(6) 0.039(5) 0.036(5) 0.001(4) -0.004(4) 0.004(4) 
N7 0.063(6) 0.029(5) 0.031(5) -0.002(4) -0.004(4) -0.006(4) 
N8 0.044(5) 0.037(5) 0.027(5) 0.006(4) 0.007(4) -0.007(4) 
N9 0.049(5) 0.025(4) 0.032(5) 0.009(4) 0.006(4) -0.001(4) 
N10 0.059(6) 0.037(5) 0.033(5) -0.003(4) -0.002(5) -0.005(4) 
N11 0.044(5) 0.024(4) 0.039(5) 0.004(4) 0.005(4) 0.004(4) 
N12 0.045(5) 0.024(4) 0.041(5) 0.004(4) 0.004(4) 0.000(4) 
C1 0.060(8) 0.042(7) 0.056(7) 0.015(6) -0.013(6) 0.001(6) 
C2 0.076(9) 0.037(7) 0.074(9) 0.007(6) -0.009(8) -0.002(6) 
C3 0.081(9) 0.028(6) 0.074(9) 0.005(6) 0.001(8) -0.008(6) 
C4 0.058(8) 0.051(8) 0.069(8) -0.007(6) -0.009(7) -0.008(6) 
C5 0.054(7) 0.029(6) 0.039(6) 0.000(5) -0.001(5) -0.006(5) 
C6 0.052(7) 0.036(6) 0.035(6) -0.006(5) -0.002(5) 0.002(5) 
C7 0.040(7) 0.046(6) 0.044(6) 0.004(5) 0.006(5) -0.007(5) 
C8 0.055(8) 0.050(7) 0.066(8) 0.004(6) -0.010(7) 0.000(6) 
C9 0.052(8) 0.073(9) 0.037(6) -0.010(6) -0.017(6) 0.021(7) 
C10 0.051(7) 0.041(6) 0.031(6) -0.003(5) -0.003(5) 0.011(5) 
C11 0.047(7) 0.044(7) 0.050(7) 0.001(5) -0.005(6) -0.007(5) 
C12 0.059(9) 0.051(7) 0.055(8) 0.005(6) -0.002(7) -0.001(6) 
C13 0.043(7) 0.047(7) 0.065(8) 0.011(6) 0.008(6) 0.005(5) 
C14 0.051(7) 0.034(6) 0.047(7) -0.002(5) 0.005(6) -0.001(5) 
C15 0.052(7) 0.022(5) 0.045(7) 0.001(5) -0.004(6) -0.009(5) 
C16 0.045(7) 0.034(6) 0.039(6) -0.010(5) 0.005(5) -0.004(5) 
C17 0.061(8) 0.032(6) 0.060(7) -0.015(5) -0.018(6) 0.014(5) 
C18 0.063(8) 0.043(7) 0.091(10) -0.030(7) -0.010(8) 0.007(6) 
C19 0.093(11) 0.062(9) 0.060(8) -0.025(7) -0.012(8) 0.010(8) 
C20 0.067(8) 0.058(8) 0.046(7) -0.016(6) -0.007(6) 0.011(6) 
C21 0.070(8) 0.042(6) 0.035(6) 0.001(5) -0.003(6) -0.006(6) 
C22 0.073(9) 0.054(8) 0.040(7) -0.004(6) 0.002(6) 0.004(6) 
C23 0.073(9) 0.044(7) 0.049(7) -0.013(6) 0.007(6) -0.023(6) 
C24 0.054(7) 0.031(6) 0.054(7) -0.008(5) 0.009(6) -0.018(5) 
C25 0.051(7) 0.032(6) 0.031(6) -0.001(5) -0.003(5) -0.009(5) 
C26 0.051(7) 0.017(5) 0.041(6) 0.005(4) -0.003(5) -0.002(5) 
C27 0.042(7) 0.041(6) 0.044(6) -0.005(5) 0.005(6) 0.001(5) 
C28 0.043(7) 0.041(7) 0.071(9) -0.003(6) 0.011(7) 0.002(5) 
C29 0.045(7) 0.054(7) 0.055(8) 0.006(6) 0.015(6) -0.005(6) 
C30 0.055(8) 0.044(7) 0.045(7) 0.006(5) -0.001(6) 0.003(6) 
C31 0.060(8) 0.044(7) 0.044(7) 0.008(5) 0.002(6) -0.009(6) 
C32 0.077(10) 0.067(9) 0.046(7) 0.002(6) 0.012(7) -0.013(7) 
C33 0.066(8) 0.056(7) 0.043(7) -0.004(6) 0.020(6) -0.003(6) 
C34 0.061(8) 0.040(6) 0.040(6) 0.007(5) 0.005(6) 0.016(6) 
C35 0.056(7) 0.022(5) 0.037(6) -0.009(5) -0.001(6) 0.008(5) 
C36 0.055(7) 0.029(6) 0.030(6) -0.003(4) 0.005(5) 0.007(5) 
C37 0.067(8) 0.028(6) 0.044(6) 0.004(5) 0.012(6) 0.001(5) 
C38 0.074(9) 0.029(6) 0.059(8) 0.006(6) 0.009(7) 0.005(6) 
C39 0.073(9) 0.036(7) 0.068(9) 0.016(6) 0.016(7) 0.005(6) 
C40 0.059(8) 0.048(7) 0.045(7) 0.014(6) 0.020(6) -0.006(6) 
P 0.069(2) 0.067(2) 0.062(2) 0.000(2) -0.011(2) -0.012(2) 
F1 0.130(10) 0.351(21) 0.069(6) 0.070(10) 0.022(6) 0.061(11) 
F2 0.117(8) 0.092(7) 0.181(11) -0.070(7) -0.053(7) 0.042(6) 
F3 0.163(9) 0.075(6) 0.066(5) 0.007(4) 0.017(6) -0.012(6) 
F4 0.201(12) 0.050(5) 0.162(10) 0.015(6) -0.069(9) -0.027(6) 
F5 0.076(6) 0.167(10) 0.148(9) 0.080(8) -0.033(6) -0.042(6) 
F6 0.066(5) 0.076(5) 0.146(8) -0.045(5) -0.011(5) 0.013(4) 
 
_geom_special_details 
; 
 All esds (except the esd in the dihedral angle between two l.s. planes) 
 are estimated using the full covariance matrix.  The cell esds are taken 
 into account individually in the estimation of esds in distances, angles 
 and torsion angles; correlations between esds in cell parameters are only 
 used when they are defined by crystal symmetry.  An approximate (isotropic) 
 treatment of cell esds is used for estimating esds involving l.s. planes. 
; 
 
loop_ 
 _geom_bond_atom_site_label_1 
 _geom_bond_atom_site_label_2 
 _geom_bond_distance 
 _geom_bond_site_symmetry_2 
 _geom_bond_publ_flag 
Cr1 N7 2.082(8) . ? 
Cr1 Cr2A 2.09(2) . ? 
Cr1 N1 2.092(8) . ? 
Cr1 N4 2.097(9) . ? 
Cr1 N10 2.117(9) . ? 
Cr1 Cl1 2.375(4) . ? 
Cr1 Cr2B 2.48(2) . ? 
Cr2A N2 1.973(12) . ? 
Cr2A N5 1.988(13) . ? 
Cr2A N11 2.020(13) . ? 
Cr2A N8 2.022(13) . ? 
Cr2A Cr3 2.48(2) . ? 
Cr2B N8 1.94(2) . ? 
Cr2B N11 1.97(3) . ? 
Cr2B N5 2.04(2) . ? 
Cr2B N2 2.07(2) . ? 
Cr2B Cr3 2.09(2) . ? 
Cr3 N12 2.058(8) . ? 
Cr3 N3 2.080(9) . ? 
Cr3 N9 2.095(8) . ? 
Cr3 N6 2.104(9) . ? 
Cr3 Cl2 2.320(4) . ? 
N1 C5 1.357(13) . ? 
N1 C1 1.385(13) . ? 
N2 C6 1.366(13) . ? 
N2 C5 1.382(12) . ? 
N3 C10 1.368(12) . ? 
N3 C6 1.378(13) . ? 
N4 C11 1.360(13) . ? 
N4 C15 1.365(13) . ? 
N5 C15 1.370(12) . ? 
N5 C16 1.389(12) . ? 
N6 C16 1.334(13) . ? 
N6 C20 1.383(13) . ? 
N7 C25 1.351(13) . ? 
N7 C21 1.361(13) . ? 
N8 C26 1.357(13) . ? 
N8 C25 1.391(12) . ? 
N9 C30 1.353(13) . ? 
N9 C26 1.383(12) . ? 
N10 C31 1.350(14) . ? 
N10 C35 1.368(13) . ? 
N11 C35 1.364(13) . ? 
N11 C36 1.384(12) . ? 
N12 C36 1.344(13) . ? 
N12 C40 1.372(13) . ? 
C1 C2 1.36(2) . ? 
C2 C3 1.37(2) . ? 
C3 C4 1.39(2) . ? 
C4 C5 1.406(15) . ? 
C6 C7 1.410(15) . ? 
C7 C8 1.347(15) . ? 
C8 C9 1.38(2) . ? 
C9 C10 1.36(2) . ? 
C11 C12 1.33(2) . ? 
C12 C13 1.39(2) . ? 
C13 C14 1.391(15) . ? 
C14 C15 1.402(15) . ? 
C16 C17 1.407(14) . ? 
C17 C18 1.37(2) . ? 
C18 C19 1.39(2) . ? 
C19 C20 1.37(2) . ? 
C21 C22 1.40(2) . ? 
C22 C23 1.38(2) . ? 
C23 C24 1.356(15) . ? 
C24 C25 1.406(14) . ? 
C26 C27 1.405(14) . ? 
C27 C28 1.37(2) . ? 
C28 C29 1.37(2) . ? 
C29 C30 1.35(2) . ? 
C31 C32 1.37(2) . ? 
C32 C33 1.39(2) . ? 
C33 C34 1.37(2) . ? 
C34 C35 1.415(15) . ? 
C36 C37 1.420(14) . ? 
C37 C38 1.387(14) . ? 
C38 C39 1.36(2) . ? 
C39 C40 1.39(2) . ? 
P F1 1.540(10) . ? 
P F5 1.562(9) . ? 
P F2 1.563(9) . ? 
P F6 1.566(8) . ? 
P F3 1.575(9) . ? 
P F4 1.585(10) . ? 
C41A Cl4A 1.69(3) . ? 
C41A Cl3A 1.73(3) . ? 
C41B Cl3B 1.72(3) . ? 
C41B Cl4B 1.75(3) . ? 
C41C Cl4C 1.72(3) . ? 
C41C Cl3C 1.74(3) . ? 
C42A Cl6A 1.71(2) . ? 
C42A Cl5A 1.71(2) . ? 
C42B Cl6B 1.68(2) . ? 
C42B Cl5B 1.70(3) . ? 
C43 Cl7C 1.05(7) . ? 
C43 Cl7A 1.12(8) . ? 
C43 Cl7D 1.63(11) . ? 
C43 Cl7C 2.08(7) 3_656 ? 
C43 Cl7B 2.23(10) . ? 
Cl7A C43 1.12(8) 3_656 ? 
Cl7A Cl7C 1.21(2) 3_656 ? 
Cl7A Cl7C 1.21(2) . ? 
Cl7B Cl7C 1.64(6) . ? 
Cl7B Cl7D 1.78(10) . ? 
Cl7C Cl7D 2.03(9) . ? 
Cl7C C43 2.08(7) 3_656 ? 
Cl7C Cl7C 2.42(4) 3_656 ? 
 
loop_ 
 _geom_angle_atom_site_label_1 
 _geom_angle_atom_site_label_2 
 _geom_angle_atom_site_label_3 
 _geom_angle 
 _geom_angle_site_symmetry_1 
 _geom_angle_site_symmetry_3 
 _geom_angle_publ_flag 
N7 Cr1 Cr2A 87.9(4) . . ? 
N7 Cr1 N1 173.8(3) . . ? 
Cr2A Cr1 N1 86.3(4) . . ? 
N7 Cr1 N4 88.8(3) . . ? 
Cr2A Cr1 N4 86.9(4) . . ? 
N1 Cr1 N4 88.9(3) . . ? 
N7 Cr1 N10 93.4(3) . . ? 
Cr2A Cr1 N10 85.2(4) . . ? 
N1 Cr1 N10 88.1(3) . . ? 
N4 Cr1 N10 171.7(3) . . ? 
N7 Cr1 Cl1 94.5(2) . . ? 
Cr2A Cr1 Cl1 177.6(3) . . ? 
N1 Cr1 Cl1 91.4(2) . . ? 
N4 Cr1 Cl1 93.9(2) . . ? 
N10 Cr1 Cl1 94.0(3) . . ? 
N7 Cr1 Cr2B 85.5(6) . . ? 
N1 Cr1 Cr2B 88.6(6) . . ? 
N4 Cr1 Cr2B 87.0(6) . . ? 
N10 Cr1 Cr2B 85.2(6) . . ? 
Cl1 Cr1 Cr2B 179.1(6) . . ? 
N2 Cr2A N5 89.9(5) . . ? 
N2 Cr2A N11 88.5(5) . . ? 
N5 Cr2A N11 169.3(12) . . ? 
N2 Cr2A N8 170.3(12) . . ? 
N5 Cr2A N8 90.4(5) . . ? 
N11 Cr2A N8 89.4(6) . . ? 
N2 Cr2A Cr1 95.1(8) . . ? 
N5 Cr2A Cr1 94.7(7) . . ? 
N11 Cr2A Cr1 96.0(7) . . ? 
N8 Cr2A Cr1 94.6(6) . . ? 
N2 Cr2A Cr3 85.2(6) . . ? 
N5 Cr2A Cr3 84.6(6) . . ? 
N11 Cr2A Cr3 84.6(7) . . ? 
N8 Cr2A Cr3 85.2(7) . . ? 
Cr1 Cr2A Cr3 179.3(5) . . ? 
N8 Cr2B N11 93.2(10) . . ? 
N8 Cr2B N5 91.2(11) . . ? 
N11 Cr2B N5 166.9(13) . . ? 
N8 Cr2B N2 167.0(12) . . ? 
N11 Cr2B N2 87.1(10) . . ? 
N5 Cr2B N2 85.9(9) . . ? 
N8 Cr2B Cr3 99.0(10) . . ? 
N11 Cr2B Cr3 97.2(10) . . ? 
N5 Cr2B Cr3 94.3(10) . . ? 
N2 Cr2B Cr3 93.8(9) . . ? 
N8 Cr2B Cr1 85.2(8) . . ? 
N11 Cr2B Cr1 85.6(9) . . ? 
N5 Cr2B Cr1 82.4(8) . . ? 
N2 Cr2B Cr1 81.8(8) . . ? 
Cr3 Cr2B Cr1 174.7(11) . . ? 
N12 Cr3 N3 86.9(3) . . ? 
N12 Cr3 Cr2B 84.0(7) . . ? 
N3 Cr3 Cr2B 87.0(7) . . ? 
N12 Cr3 N9 90.9(3) . . ? 
N3 Cr3 N9 170.5(3) . . ? 
Cr2B Cr3 N9 83.7(7) . . ? 
N12 Cr3 N6 170.5(3) . . ? 
N3 Cr3 N6 89.0(3) . . ? 
Cr2B Cr3 N6 87.3(7) . . ? 
N9 Cr3 N6 91.8(3) . . ? 
N12 Cr3 Cl2 94.4(2) . . ? 
N3 Cr3 Cl2 93.7(2) . . ? 
Cr2B Cr3 Cl2 178.2(6) . . ? 
N9 Cr3 Cl2 95.6(2) . . ? 
N6 Cr3 Cl2 94.4(2) . . ? 
N12 Cr3 Cr2A 86.1(3) . . ? 
N3 Cr3 Cr2A 85.3(3) . . ? 
N9 Cr3 Cr2A 85.4(3) . . ? 
N6 Cr3 Cr2A 85.0(3) . . ? 
Cl2 Cr3 Cr2A 178.9(3) . . ? 
C5 N1 C1 117.7(9) . . ? 
C5 N1 Cr1 119.6(6) . . ? 
C1 N1 Cr1 122.6(7) . . ? 
C6 N2 C5 122.5(8) . . ? 
C6 N2 Cr2A 122.1(9) . . ? 
C5 N2 Cr2A 115.3(8) . . ? 
C6 N2 Cr2B 112.2(9) . . ? 
C5 N2 Cr2B 125.3(9) . . ? 
C10 N3 C6 117.0(9) . . ? 
C10 N3 Cr3 122.9(7) . . ? 
C6 N3 Cr3 120.0(7) . . ? 
C11 N4 C15 118.1(9) . . ? 
C11 N4 Cr1 122.5(7) . . ? 
C15 N4 Cr1 119.4(7) . . ? 
C15 N5 C16 122.7(9) . . ? 
C15 N5 Cr2A 116.4(8) . . ? 
C16 N5 Cr2A 120.0(8) . . ? 
C15 N5 Cr2B 124.5(9) . . ? 
C16 N5 Cr2B 112.7(9) . . ? 
C16 N6 C20 120.4(9) . . ? 
C16 N6 Cr3 120.3(7) . . ? 
C20 N6 Cr3 118.9(7) . . ? 
C25 N7 C21 118.7(8) . . ? 
C25 N7 Cr1 120.8(6) . . ? 
C21 N7 Cr1 120.6(7) . . ? 
C26 N8 C25 122.4(8) . . ? 
C26 N8 Cr2B 113.8(9) . . ? 
C25 N8 Cr2B 123.7(10) . . ? 
C26 N8 Cr2A 122.7(8) . . ? 
C25 N8 Cr2A 114.7(8) . . ? 
C30 N9 C26 118.3(9) . . ? 
C30 N9 Cr3 121.2(7) . . ? 
C26 N9 Cr3 120.5(7) . . ? 
C31 N10 C35 119.2(10) . . ? 
C31 N10 Cr1 120.1(7) . . ? 
C35 N10 Cr1 120.0(7) . . ? 
C35 N11 C36 124.3(8) . . ? 
C35 N11 Cr2B 122.5(9) . . ? 
C36 N11 Cr2B 112.1(9) . . ? 
C35 N11 Cr2A 111.9(8) . . ? 
C36 N11 Cr2A 123.3(9) . . ? 
C36 N12 C40 117.6(9) . . ? 
C36 N12 Cr3 121.4(6) . . ? 
C40 N12 Cr3 120.6(7) . . ? 
C2 C1 N1 122.2(10) . . ? 
C1 C2 C3 120.1(11) . . ? 
C2 C3 C4 119.4(11) . . ? 
C3 C4 C5 118.9(11) . . ? 
N1 C5 N2 113.4(8) . . ? 
N1 C5 C4 121.6(9) . . ? 
N2 C5 C4 124.8(9) . . ? 
N2 C6 N3 114.6(9) . . ? 
N2 C6 C7 124.7(10) . . ? 
N3 C6 C7 120.2(9) . . ? 
C8 C7 C6 120.4(11) . . ? 
C7 C8 C9 119.8(12) . . ? 
C10 C9 C8 118.9(10) . . ? 
C9 C10 N3 123.7(10) . . ? 
C12 C11 N4 123.1(11) . . ? 
C11 C12 C13 120.5(11) . . ? 
C12 C13 C14 118.3(11) . . ? 
C13 C14 C15 119.1(10) . . ? 
N4 C15 N5 113.4(9) . . ? 
N4 C15 C14 120.8(9) . . ? 
N5 C15 C14 125.6(10) . . ? 
N6 C16 N5 114.8(8) . . ? 
N6 C16 C17 121.3(9) . . ? 
N5 C16 C17 123.6(10) . . ? 
C18 C17 C16 118.8(11) . . ? 
C17 C18 C19 119.2(11) . . ? 
C20 C19 C18 120.8(12) . . ? 
C19 C20 N6 119.4(11) . . ? 
N7 C21 C22 122.1(10) . . ? 
C23 C22 C21 118.3(10) . . ? 
C24 C23 C22 119.8(10) . . ? 
C23 C24 C25 120.4(10) . . ? 
N7 C25 N8 113.7(8) . . ? 
N7 C25 C24 120.5(9) . . ? 
N8 C25 C24 125.7(9) . . ? 
N8 C26 N9 114.4(9) . . ? 
N8 C26 C27 125.7(9) . . ? 
N9 C26 C27 119.4(9) . . ? 
C28 C27 C26 119.5(10) . . ? 
C27 C28 C29 120.7(11) . . ? 
C30 C29 C28 118.6(11) . . ? 
N9 C30 C29 123.4(11) . . ? 
N10 C31 C32 123.7(11) . . ? 
C31 C32 C33 117.8(12) . . ? 
C34 C33 C32 120.1(12) . . ? 
C33 C34 C35 120.0(10) . . ? 
N11 C35 N10 114.5(9) . . ? 
N11 C35 C34 126.1(9) . . ? 
N10 C35 C34 119.1(10) . . ? 
N12 C36 N11 114.6(8) . . ? 
N12 C36 C37 122.2(9) . . ? 
N11 C36 C37 123.1(9) . . ? 
C38 C37 C36 118.6(10) . . ? 
C39 C38 C37 119.4(11) . . ? 
C38 C39 C40 119.6(10) . . ? 
N12 C40 C39 122.3(10) . . ? 
F1 P F5 91.8(6) . . ? 
F1 P F2 92.1(8) . . ? 
F5 P F2 90.3(6) . . ? 
F1 P F6 88.5(6) . . ? 
F5 P F6 179.1(6) . . ? 
F2 P F6 90.4(5) . . ? 
F1 P F3 178.1(8) . . ? 
F5 P F3 88.5(6) . . ? 
F2 P F3 89.8(6) . . ? 
F6 P F3 91.2(6) . . ? 
F1 P F4 90.3(8) . . ? 
F5 P F4 91.8(7) . . ? 
F2 P F4 176.7(8) . . ? 
F6 P F4 87.4(6) . . ? 
F3 P F4 87.9(6) . . ? 
Cl4A C41A Cl3A 117.3(23) . . ? 
Cl3B C41B Cl4B 112.3(18) . . ? 
Cl4C C41C Cl3C 114.5(18) . . ? 
Cl6A C42A Cl5A 116.8(21) . . ? 
Cl6B C42B Cl5B 127.8(22) . . ? 
Cl7C C43 Cl7A 67.8(50) . . ? 
Cl7C C43 Cl7D 96.0(62) . . ? 
Cl7A C43 Cl7D 154.6(72) . . ? 
Cl7C C43 Cl7C 95.7(54) . 3_656 ? 
Cl7A C43 Cl7C 28.0(21) . 3_656 ? 
Cl7D C43 Cl7C 156.8(53) . 3_656 ? 
Cl7C C43 Cl7B 43.9(37) . . ? 
Cl7A C43 Cl7B 108.4(54) . . ? 
Cl7D C43 Cl7B 52.2(38) . . ? 
Cl7C C43 Cl7B 134.9(44) 3_656 . ? 
C43 Cl7A C43 180.00(3) . 3_656 ? 
C43 Cl7A Cl7C 126.4(37) . 3_656 ? 
C43 Cl7A Cl7C 53.6(37) 3_656 3_656 ? 
C43 Cl7A Cl7C 53.6(37) . . ? 
C43 Cl7A Cl7C 126.4(37) 3_656 . ? 
Cl7C Cl7A Cl7C 179.995(3) 3_656 . ? 
Cl7C Cl7B Cl7D 72.6(39) . . ? 
Cl7C Cl7B C43 26.4(22) . . ? 
Cl7D Cl7B C43 46.2(35) . . ? 
C43 Cl7C Cl7A 58.7(44) . . ? 
C43 Cl7C Cl7B 109.7(51) . . ? 
Cl7A Cl7C Cl7B 156.1(26) . . ? 
C43 Cl7C Cl7D 52.9(47) . . ? 
Cl7A Cl7C Cl7D 109.1(28) . . ? 
Cl7B Cl7C Cl7D 56.8(31) . . ? 
C43 Cl7C C43 84.3(54) . 3_656 ? 
Cl7A Cl7C C43 25.6(22) . 3_656 ? 
Cl7B Cl7C C43 153.4(32) . 3_656 ? 
Cl7D Cl7C C43 133.3(38) . 3_656 ? 
C43 Cl7C Cl7C 58.7(44) . 3_656 ? 
Cl7A Cl7C Cl7C 0.002(1) . 3_656 ? 
Cl7B Cl7C Cl7C 156.1(26) . 3_656 ? 
Cl7D Cl7C Cl7C 109.1(28) . 3_656 ? 
C43 Cl7C Cl7C 25.6(22) 3_656 3_656 ? 
C43 Cl7D Cl7B 81.6(51) . . ? 
C43 Cl7D Cl7C 31.1(31) . . ? 
Cl7B Cl7D Cl7C 50.5(30) . . ? 
 
loop_ 
 _geom_torsion_atom_site_label_1 
 _geom_torsion_atom_site_label_2 
 _geom_torsion_atom_site_label_3 
 _geom_torsion_atom_site_label_4 
 _geom_torsion 
 _geom_torsion_site_symmetry_1 
 _geom_torsion_site_symmetry_2 
 _geom_torsion_site_symmetry_3 
 _geom_torsion_site_symmetry_4 
 _geom_torsion_publ_flag 
 N1 Cr1 Cr3 N3 48.4(3) . . . . ? 
 N4 Cr1 Cr3 N6 48.1(3) . . . . ? 
 N7 Cr1 Cr3 N9 44.8(3) . . . . ? 
 N10 Cr1 Cr3 N12 47.2(3) . . . . ? 
 
_refine_diff_density_max    0.843 
_refine_diff_density_min   -0.731 
_refine_diff_density_rms    0.118 
 
#===END

data_cmpd_6
 
_audit_creation_method            SHELXL 

_chemical_formula_moiety          ? 
_chemical_formula_structural      
; [Cr3(N3C10H8)4(F)(BF4)][BF4].2(CH2Cl2)
;
_chemical_formula_sum             'C42 H36 B2 Cl4 Cr3 F9 N12' 
_chemical_formula_weight          1199.25 
_chemical_melting_point           ? 
_chemical_compound_source         synthesis
 
loop_ 
 _atom_type_symbol 
 _atom_type_description 
 _atom_type_scat_dispersion_real 
 _atom_type_scat_dispersion_imag 
 _atom_type_scat_source 
 'C'  'C'   0.0033   0.0016 
 'International Tables Vol C Tables 4.2.6.8 and 6.1.1.4' 
 'H'  'H'   0.0000   0.0000 
 'International Tables Vol C Tables 4.2.6.8 and 6.1.1.4' 
 'B'  'B'   0.0013   0.0007 
 'International Tables Vol C Tables 4.2.6.8 and 6.1.1.4' 
 'N'  'N'   0.0061   0.0033 
 'International Tables Vol C Tables 4.2.6.8 and 6.1.1.4' 
 'F'  'F'   0.0171   0.0103 
 'International Tables Vol C Tables 4.2.6.8 and 6.1.1.4' 
 'Cr'  'Cr'   0.3209   0.6236 
 'International Tables Vol C Tables 4.2.6.8 and 6.1.1.4' 
 'Cl'  'Cl'   0.1484   0.1585 
 'International Tables Vol C Tables 4.2.6.8 and 6.1.1.4' 
 
_symmetry_cell_setting            orthorhombic
_symmetry_space_group_name_H-M    Pna21
 
loop_ 
 _symmetry_equiv_pos_as_xyz 
 'x, y, z' 
 '-x, -y, z+1/2' 
 'x+1/2, -y+1/2, z' 
 '-x+1/2, y+1/2, z+1/2' 
 
_cell_length_a                    23.878(2) 
_cell_length_b                    29.4880(10) 
_cell_length_c                    14.245(8) 
_cell_angle_alpha                 90.00 
_cell_angle_beta                  90.00 
_cell_angle_gamma                 90.00 
_cell_volume                      10030(6) 
_cell_formula_units_Z             8 
_cell_measurement_temperature     213(2) 
_cell_measurement_reflns_used     174
_cell_measurement_theta_min       9.0
_cell_measurement_theta_max       18.5
 
_exptl_crystal_description        plate
_exptl_crystal_colour             'dark green'
_exptl_crystal_size_max           0.6
_exptl_crystal_size_mid           0.2
_exptl_crystal_size_min           0.05
_exptl_crystal_density_meas       ? 
_exptl_crystal_density_diffrn     1.588 
_exptl_crystal_density_method     ? 
_exptl_crystal_F_000              4824 
_exptl_absorpt_coefficient_mu     0.931 
_exptl_absorpt_correction_type    none
_exptl_absorpt_correction_T_min   ? 
_exptl_absorpt_correction_T_max   ? 
 
 
_diffrn_ambient_temperature       213(2) 
_diffrn_radiation_wavelength      0.71073 
_diffrn_radiation_type            MoK\a 
_diffrn_radiation_source          'fine-focus sealed tube' 
_diffrn_radiation_monochromator   graphite 
_diffrn_measurement_device        'Nonius FAST'
_diffrn_measurement_method        'Ellipsoid-mask fitting'
_diffrn_standards_number          'None (Area detector)'
_diffrn_standards_interval_count  ? 
_diffrn_standards_interval_time   ? 
_diffrn_standards_decay_%         ? 
_diffrn_reflns_number             44818 
_diffrn_reflns_av_R_equivalents   0.1016 
_diffrn_reflns_av_sigmaI/netI     0.0683 
_diffrn_reflns_limit_h_min        -25 
_diffrn_reflns_limit_h_max        24 
_diffrn_reflns_limit_k_min        -31 
_diffrn_reflns_limit_k_max        31 
_diffrn_reflns_limit_l_min        -14 
_diffrn_reflns_limit_l_max        15 
_diffrn_reflns_theta_min          2.16 
_diffrn_reflns_theta_max          22.64 
_reflns_number_total              12827 
_reflns_number_observed           10515 
_reflns_observed_criterion        >2sigma(I) 
 
_computing_data_collection        MADNES
_computing_cell_refinement        MADNES
_computing_data_reduction         PROCOR
_computing_structure_solution     'SHELXS-86 (Sheldrick, 1990)' 
_computing_structure_refinement   'SHELXL-93 (Sheldrick, 1993)' 
_computing_molecular_graphics     'XP (Siemens, 1996)'
_computing_publication_material   'SHELXL-93 (Sheldrick, 1993)' 
 
_refine_special_details 
; 
 Refinement on F^2^ for ALL reflections except for 4 with very negative F^2^ 
 or flagged by the user for potential systematic errors.  Weighted R-factors 
 wR and all goodnesses of fit S are based on F^2^, conventional R-factors R 
 are based on F, with F set to zero for negative F^2^. The observed criterion 
 of F^2^ > 2sigma(F^2^) is used only for calculating _R_factor_obs etc. and is 
 not relevant to the choice of reflections for refinement.  R-factors based 
 on F^2^ are statistically about twice as large as those based on F, and R- 
 factors based on ALL data will be even larger. 
; 
 
_refine_ls_structure_factor_coef  Fsqd  
_refine_ls_matrix_type            full 
_refine_ls_weighting_scheme 
 'calc w=1/[\s^2^(Fo^2^)+(0.062P)^2^+52.0P] where P=(Fo^2^+2Fc^2^)/3' 
_atom_sites_solution_primary      direct 
_atom_sites_solution_secondary    difmap 
_atom_sites_solution_hydrogens    geom 
_refine_ls_hydrogen_treatment     noref
_refine_ls_extinction_method      none 
_refine_ls_extinction_coef        ? 
_refine_ls_abs_structure_details 
 'Flack H D (1983), Acta Cryst. A39, 876-881' 
_refine_ls_abs_structure_Flack    -0.04(3) 
_refine_ls_number_reflns          12823 
_refine_ls_number_parameters      1307 
_refine_ls_number_restraints      64 
_refine_ls_R_factor_all           0.0917 
_refine_ls_R_factor_obs           0.0676 
_refine_ls_wR_factor_all          0.1733 
_refine_ls_wR_factor_obs          0.1506 
_refine_ls_goodness_of_fit_all    1.077 
_refine_ls_goodness_of_fit_obs    1.048 
_refine_ls_restrained_S_all       1.081 
_refine_ls_restrained_S_obs       1.048 
_refine_ls_shift/esd_max          0.185 
_refine_ls_shift/esd_mean         0.006 
 
loop_ 
 _atom_site_label 
 _atom_site_type_symbol 
 _atom_site_fract_x 
 _atom_site_fract_y 
 _atom_site_fract_z 
 _atom_site_U_iso_or_equiv 
 _atom_site_thermal_displace_type 
 _atom_site_occupancy 
 _atom_site_calc_flag 
 _atom_site_refinement_flags 
 _atom_site_disorder_group 
Cr1 Cr 0.61772(6) 0.37866(5) 0.28878(11) 0.0281(4) Uani 1 d . . 
Cr2 Cr 0.60602(6) 0.40372(5) 0.41011(10) 0.0268(4) Uani 1 d . . 
Cr3 Cr 0.58893(7) 0.43945(5) 0.57410(11) 0.0353(4) Uani 1 d . . 
B1 B 0.6414(5) 0.3409(4) 0.0494(9) 0.042(3) Uani 1 d . . 
F1 F 0.6317(2) 0.3506(2) 0.1472(4) 0.0442(15) Uani 1 d . . 
F2 F 0.6881(3) 0.3634(3) 0.0222(5) 0.081(2) Uani 1 d . . 
F3 F 0.6445(4) 0.2962(2) 0.0378(5) 0.080(2) Uani 1 d . . 
F4 F 0.5962(3) 0.3581(3) 0.0012(5) 0.069(2) Uani 1 d . . 
F5 F 0.5762(3) 0.4639(2) 0.6896(4) 0.049(2) Uani 1 d . . 
N1 N 0.6316(3) 0.4425(3) 0.2338(5) 0.029(2) Uani 1 d . . 
N2 N 0.6446(3) 0.4634(3) 0.3867(6) 0.033(2) Uani 1 d . . 
N3 N 0.6537(4) 0.4822(3) 0.5448(6) 0.038(2) Uani 1 d . . 
N4 N 0.7026(3) 0.3719(3) 0.3160(6) 0.035(2) Uani 1 d . . 
N5 N 0.6769(3) 0.3821(3) 0.4695(6) 0.032(2) Uani 1 d . . 
N6 N 0.6456(3) 0.3927(3) 0.6221(5) 0.034(2) Uani 1 d . . 
N7 N 0.6012(4) 0.3143(3) 0.3362(6) 0.037(2) Uani 1 d . . 
N8 N 0.5650(3) 0.3507(3) 0.4647(5) 0.032(2) Uani 1 d . . 
N9 N 0.5262(3) 0.3922(3) 0.5847(6) 0.037(2) Uani 1 d . . 
N10 N 0.5327(3) 0.3841(3) 0.2577(5) 0.031(2) Uani 1 d . . 
N11 N 0.5318(3) 0.4340(3) 0.3821(5) 0.031(2) Uani 1 d . . 
N12 N 0.5360(3) 0.4840(3) 0.5082(5) 0.034(2) Uani 1 d . . 
C1 C 0.6251(4) 0.4531(4) 0.1415(7) 0.035(3) Uani 1 d . . 
H1 H 0.6147(4) 0.4297(4) 0.1002(7) 0.043 Uiso 1 calc R . 
C2 C 0.6327(5) 0.4943(4) 0.1059(7) 0.043(3) Uani 1 d . . 
H2 H 0.6297(5) 0.4993(4) 0.0409(7) 0.051 Uiso 1 calc R . 
C3 C 0.6451(5) 0.5301(4) 0.1666(8) 0.048(3) Uani 1 d . . 
H3 H 0.6501(5) 0.5596(4) 0.1430(8) 0.058 Uiso 1 calc R . 
C4 C 0.6500(4) 0.5218(3) 0.2616(8) 0.040(3) Uani 1 d . . 
H4 H 0.6572(4) 0.5455(3) 0.3039(8) 0.048 Uiso 1 calc R . 
C5 C 0.6439(4) 0.4771(3) 0.2935(7) 0.034(2) Uani 1 d . . 
C6 C 0.6726(5) 0.4878(3) 0.4572(8) 0.042(3) Uani 1 d . . 
C7 C 0.7192(4) 0.5151(3) 0.4379(8) 0.044(3) Uani 1 d . . 
H7 H 0.7333(4) 0.5175(3) 0.3765(8) 0.053 Uiso 1 calc R . 
C8 C 0.7437(5) 0.5384(4) 0.5112(10) 0.053(3) Uani 1 d . . 
H8 H 0.7754(5) 0.5566(4) 0.5003(10) 0.064 Uiso 1 calc R . 
C9 C 0.7215(5) 0.5349(4) 0.6013(8) 0.048(3) Uani 1 d . . 
H9 H 0.7361(5) 0.5523(4) 0.6510(8) 0.057 Uiso 1 calc R . 
C10 C 0.6789(5) 0.5064(3) 0.6157(8) 0.047(3) Uani 1 d . . 
H10 H 0.6654(5) 0.5027(3) 0.6772(8) 0.056 Uiso 1 calc R . 
C11 C 0.7413(4) 0.3681(4) 0.2460(7) 0.039(3) Uani 1 d . . 
H11 H 0.7292(4) 0.3665(4) 0.1833(7) 0.046 Uiso 1 calc R . 
C12 C 0.7973(4) 0.3665(4) 0.2650(8) 0.053(3) Uani 1 d . . 
H12 H 0.8231(4) 0.3630(4) 0.2158(8) 0.063 Uiso 1 calc R . 
C13 C 0.8160(5) 0.3702(4) 0.3565(8) 0.053(3) Uani 1 d . . 
H13 H 0.8545(5) 0.3692(4) 0.3700(8) 0.064 Uiso 1 calc R . 
C14 C 0.7772(4) 0.3755(4) 0.4283(7) 0.039(3) Uani 1 d . . 
H14 H 0.7891(4) 0.3790(4) 0.4908(7) 0.047 Uiso 1 calc R . 
C15 C 0.7206(4) 0.3756(3) 0.4061(7) 0.030(2) Uani 1 d . . 
C16 C 0.6820(4) 0.3710(3) 0.5630(7) 0.027(2) Uani 1 d . . 
C17 C 0.7179(4) 0.3376(4) 0.6014(8) 0.043(3) Uani 1 d . . 
H17 H 0.7424(4) 0.3218(4) 0.5616(8) 0.052 Uiso 1 calc R . 
C18 C 0.7175(5) 0.3282(4) 0.6939(8) 0.054(3) Uani 1 d . . 
H18 H 0.7416(5) 0.3060(4) 0.7185(8) 0.065 Uiso 1 calc R . 
C19 C 0.6816(5) 0.3515(4) 0.7523(8) 0.055(3) Uani 1 d . . 
H19 H 0.6816(5) 0.3459(4) 0.8172(8) 0.066 Uiso 1 calc R . 
C20 C 0.6461(5) 0.3825(4) 0.7147(8) 0.047(3) Uani 1 d . . 
H20 H 0.6208(5) 0.3975(4) 0.7546(8) 0.057 Uiso 1 calc R . 
C21 C 0.6144(5) 0.2765(3) 0.2861(8) 0.042(3) Uani 1 d . . 
H21 H 0.6322(5) 0.2797(3) 0.2277(8) 0.050 Uiso 1 calc R . 
C22 C 0.6024(5) 0.2336(4) 0.3185(8) 0.055(3) Uani 1 d . . 
H22 H 0.6111(5) 0.2080(4) 0.2823(8) 0.066 Uiso 1 calc R . 
C23 C 0.5771(5) 0.2290(4) 0.4056(9) 0.056(3) Uani 1 d . . 
H23 H 0.5695(5) 0.1999(4) 0.4294(9) 0.067 Uiso 1 calc R . 
C24 C 0.5634(5) 0.2660(4) 0.4564(8) 0.045(3) Uani 1 d . . 
H24 H 0.5457(5) 0.2628(4) 0.5151(8) 0.054 Uiso 1 calc R . 
C25 C 0.5757(4) 0.3093(3) 0.4207(7) 0.037(3) Uani 1 d . . 
C26 C 0.5210(4) 0.3555(3) 0.5262(7) 0.036(3) Uani 1 d . . 
C27 C 0.4727(5) 0.3281(4) 0.5310(8) 0.046(3) Uani 1 d . . 
H27 H 0.4679(5) 0.3040(4) 0.4887(8) 0.055 Uiso 1 calc R . 
C28 C 0.4328(5) 0.3369(4) 0.5978(10) 0.060(4) Uani 1 d . . 
H28 H 0.4009(5) 0.3183(4) 0.6019(10) 0.072 Uiso 1 calc R . 
C29 C 0.4389(6) 0.3720(5) 0.6575(10) 0.064(4) Uani 1 d . . 
H29 H 0.4121(6) 0.3772(5) 0.7046(10) 0.076 Uiso 1 calc R . 
C30 C 0.4844(5) 0.3998(4) 0.6490(8) 0.046(3) Uani 1 d . . 
H30 H 0.4872(5) 0.4251(4) 0.6888(8) 0.055 Uiso 1 calc R . 
C31 C 0.5061(4) 0.3591(3) 0.1917(7) 0.036(3) Uani 1 d . . 
H31 H 0.5272(4) 0.3391(3) 0.1546(7) 0.044 Uiso 1 calc R . 
C32 C 0.4499(4) 0.3620(4) 0.1773(8) 0.041(3) Uani 1 d . . 
H32 H 0.4327(4) 0.3447(4) 0.1300(8) 0.049 Uiso 1 calc R . 
C33 C 0.4186(5) 0.3906(4) 0.2329(8) 0.045(3) Uani 1 d . . 
H33 H 0.3796(5) 0.3924(4) 0.2239(8) 0.054 Uiso 1 calc R . 
C34 C 0.4432(4) 0.4161(3) 0.3007(8) 0.039(3) Uani 1 d . . 
H34 H 0.4217(4) 0.4354(3) 0.3390(8) 0.047 Uiso 1 calc R . 
C35 C 0.5021(4) 0.4131(3) 0.3126(7) 0.029(2) Uani 1 d . . 
C36 C 0.5157(4) 0.4749(3) 0.4184(7) 0.032(2) Uani 1 d . . 
C37 C 0.4842(4) 0.5078(3) 0.3705(7) 0.038(3) Uani 1 d . . 
H37 H 0.4698(4) 0.5017(3) 0.3104(7) 0.046 Uiso 1 calc R . 
C38 C 0.4746(4) 0.5491(3) 0.4127(8) 0.046(3) Uani 1 d . . 
H38 H 0.4536(4) 0.5713(3) 0.3813(8) 0.055 Uiso 1 calc R . 
C39 C 0.4959(5) 0.5579(4) 0.5015(8) 0.049(3) Uani 1 d . . 
H39 H 0.4890(5) 0.5859(4) 0.5308(8) 0.059 Uiso 1 calc R . 
C40 C 0.5270(4) 0.5257(3) 0.5457(7) 0.038(2) Uani 1 d . . 
H40 H 0.5428(4) 0.5325(3) 0.6044(7) 0.046 Uiso 1 calc R . 
Cr4 Cr 0.94060(6) 0.34574(5) 0.78075(11) 0.0284(4) Uani 1 d . . 
Cr5 Cr 0.96206(6) 0.37106(5) 0.89824(11) 0.0282(4) Uani 1 d . . 
Cr6 Cr 0.99046(6) 0.40594(5) 1.05727(11) 0.0307(4) Uani 1 d . . 
B2 B 0.9007(5) 0.3061(4) 0.5472(9) 0.041(3) Uani 1 d . . 
F6 F 0.9165(2) 0.3165(2) 0.6450(4) 0.0432(15) Uani 1 d . . 
F7 F 0.8461(3) 0.2958(3) 0.5494(6) 0.091(3) Uani 1 d . . 
F8 F 0.9082(3) 0.3457(3) 0.4992(5) 0.082(2) Uani 1 d . . 
F9 F 0.9346(4) 0.2747(3) 0.5183(6) 0.106(3) Uani 1 d . . 
F10 F 1.0081(2) 0.4308(2) 1.1696(4) 0.0405(14) Uani 1 d . . 
N13 N 0.8954(3) 0.4044(3) 0.7482(5) 0.032(2) Uani 1 d . . 
N14 N 0.9491(3) 0.4366(3) 0.8647(5) 0.031(2) Uani 1 d . . 
N15 N 1.0051(3) 0.4641(3) 0.9834(6) 0.035(2) Uani 1 d . . 
N16 N 1.0124(3) 0.3724(3) 0.7178(5) 0.027(2) Uani 1 d . . 
N17 N 1.0434(3) 0.3794(3) 0.8703(5) 0.028(2) Uani 1 d . . 
N18 N 1.0695(3) 0.3838(3) 1.0240(5) 0.033(2) Uani 1 d . . 
N19 N 0.9842(3) 0.2865(3) 0.8130(5) 0.029(2) Uani 1 d . . 
N20 N 0.9807(3) 0.3128(3) 0.9630(5) 0.027(2) Uani 1 d . . 
N21 N 0.9731(3) 0.3427(3) 1.1115(5) 0.033(2) Uani 1 d . . 
N22 N 0.8699(3) 0.3170(3) 0.8414(6) 0.033(2) Uani 1 d . . 
N23 N 0.8861(3) 0.3693(3) 0.9571(5) 0.032(2) Uani 1 d . . 
N24 N 0.9065(3) 0.4230(3) 1.0685(6) 0.032(2) Uani 1 d . . 
C41 C 0.8531(5) 0.4059(4) 0.6869(8) 0.049(3) Uani 1 d . . 
H41 H 0.8448(5) 0.3795(4) 0.6529(8) 0.059 Uiso 1 calc R . 
C42 C 0.8218(5) 0.4429(4) 0.6708(9) 0.062(4) Uani 1 d . . 
H42 H 0.7920(5) 0.4423(4) 0.6277(9) 0.075 Uiso 1 calc R . 
C43 C 0.8352(6) 0.4822(4) 0.7208(10) 0.067(4) Uani 1 d . . 
H43 H 0.8148(6) 0.5089(4) 0.7098(10) 0.080 Uiso 1 calc R . 
C44 C 0.8773(4) 0.4824(4) 0.7848(8) 0.047(3) Uani 1 d . . 
H44 H 0.8857(4) 0.5089(4) 0.8186(8) 0.056 Uiso 1 calc R . 
C45 C 0.9078(4) 0.4429(3) 0.7999(6) 0.030(2) Uani 1 d . . 
C46 C 0.9825(4) 0.4729(3) 0.8990(7) 0.031(2) Uani 1 d . . 
C47 C 0.9929(5) 0.5125(4) 0.8500(8) 0.048(3) Uani 1 d . . 
H47 H 0.9751(5) 0.5187(4) 0.7925(8) 0.057 Uiso 1 calc R . 
C48 C 1.0297(5) 0.5421(4) 0.8886(9) 0.063(4) Uani 1 d . . 
H48 H 1.0387(5) 0.5687(4) 0.8555(9) 0.076 Uiso 1 calc R . 
C49 C 1.0545(6) 0.5347(4) 0.9741(9) 0.057(3) Uani 1 d . . 
H49 H 1.0791(6) 0.5560(4) 1.0007(9) 0.069 Uiso 1 calc R . 
C50 C 1.0420(5) 0.4952(4) 1.0185(8) 0.045(3) Uani 1 d . . 
H50 H 1.0596(5) 0.4890(4) 1.0761(8) 0.054 Uiso 1 calc R . 
C51 C 1.0162(4) 0.3792(3) 0.6232(7) 0.033(2) Uani 1 d . . 
H51 H 0.9856(4) 0.3723(3) 0.5842(7) 0.040 Uiso 1 calc R . 
C52 C 1.0647(5) 0.3963(4) 0.5849(8) 0.045(3) Uani 1 d . . 
H52 H 1.0680(5) 0.3991(4) 0.5194(8) 0.054 Uiso 1 calc R . 
C53 C 1.1083(4) 0.4092(4) 0.6416(7) 0.040(3) Uani 1 d . . 
H53 H 1.1409(4) 0.4218(4) 0.6155(7) 0.048 Uiso 1 calc R . 
C54 C 1.1036(4) 0.4034(3) 0.7376(7) 0.037(3) Uani 1 d . . 
H54 H 1.1331(4) 0.4123(3) 0.7773(7) 0.044 Uiso 1 calc R . 
C55 C 1.0555(4) 0.3846(3) 0.7753(7) 0.031(2) Uani 1 d . . 
C56 C 1.0843(4) 0.3721(3) 0.9358(6) 0.031(2) Uani 1 d . . 
C57 C 1.1363(4) 0.3523(4) 0.9155(8) 0.043(3) Uani 1 d . . 
H57 H 1.1459(4) 0.3439(4) 0.8539(8) 0.051 Uiso 1 calc R . 
C58 C 1.1732(5) 0.3455(4) 0.9898(9) 0.049(3) Uani 1 d . . 
H58 H 1.2086(5) 0.3327(4) 0.9782(9) 0.059 Uiso 1 calc R . 
C59 C 1.1584(4) 0.3576(4) 1.0824(8) 0.043(3) Uani 1 d . . 
H59 H 1.1835(4) 0.3535(4) 1.1325(8) 0.051 Uiso 1 calc R . 
C60 C 1.1064(4) 0.3755(3) 1.0967(8) 0.039(3) Uani 1 d . . 
H60 H 1.0952(4) 0.3823(3) 1.1583(8) 0.047 Uiso 1 calc R . 
C61 C 1.0000(4) 0.2564(3) 0.7446(7) 0.033(2) Uani 1 d . . 
H61 H 0.9879(4) 0.2614(3) 0.6827(7) 0.040 Uiso 1 calc R . 
C62 C 1.0331(5) 0.2189(4) 0.7635(8) 0.046(3) Uani 1 d . . 
H62 H 1.0435(5) 0.1985(4) 0.7160(8) 0.056 Uiso 1 calc R . 
C63 C 1.0505(5) 0.2129(4) 0.8564(8) 0.052(3) Uani 1 d . . 
H63 H 1.0737(5) 0.1883(4) 0.8721(8) 0.063 Uiso 1 calc R . 
C64 C 1.0337(4) 0.2427(3) 0.9246(7) 0.040(3) Uani 1 d . . 
H64 H 1.0461(4) 0.2385(3) 0.9866(7) 0.048 Uiso 1 calc R . 
C65 C 0.9993(4) 0.2787(3) 0.9043(7) 0.026(2) Uani 1 d . . 
C66 C 0.9725(4) 0.3050(3) 1.0580(7) 0.031(2) Uani 1 d . . 
C67 C 0.9582(5) 0.2629(4) 1.0968(8) 0.048(3) Uani 1 d . . 
H67 H 0.9558(5) 0.2368(4) 1.0592(8) 0.057 Uiso 1 calc R . 
C68 C 0.9481(6) 0.2610(4) 1.1898(8) 0.065(4) Uani 1 d . . 
H68 H 0.9391(6) 0.2328(4) 1.2168(8) 0.078 Uiso 1 calc R . 
C69 C 0.9504(5) 0.2984(4) 1.2463(8) 0.052(3) Uani 1 d . . 
H69 H 0.9435(5) 0.2964(4) 1.3111(8) 0.062 Uiso 1 calc R . 
C70 C 0.9633(5) 0.3393(4) 1.2041(7) 0.042(3) Uani 1 d . . 
H70 H 0.9654(5) 0.3655(4) 1.2414(7) 0.051 Uiso 1 calc R . 
C71 C 0.8435(4) 0.2799(3) 0.8052(8) 0.036(2) Uani 1 d . . 
H71 H 0.8560(4) 0.2679(3) 0.7479(8) 0.043 Uiso 1 calc R . 
C72 C 0.7993(5) 0.2597(4) 0.8498(8) 0.044(3) Uani 1 d . . 
H72 H 0.7819(5) 0.2342(4) 0.8235(8) 0.052 Uiso 1 calc R . 
C73 C 0.7812(4) 0.2770(4) 0.9321(8) 0.045(3) Uani 1 d . . 
H73 H 0.7505(4) 0.2636(4) 0.9626(8) 0.054 Uiso 1 calc R . 
C74 C 0.8068(4) 0.3138(3) 0.9718(8) 0.041(3) Uani 1 d . . 
H74 H 0.7943(4) 0.3252(3) 1.0298(8) 0.049 Uiso 1 calc R . 
C75 C 0.8512(4) 0.3341(3) 0.9263(7) 0.034(2) Uani 1 d . . 
C76 C 0.8659(4) 0.4010(3) 1.0160(7) 0.036(3) Uani 1 d . . 
C77 C 0.8097(4) 0.4153(3) 1.0244(7) 0.038(3) Uani 1 d . . 
H77 H 0.7816(4) 0.4004(3) 0.9902(7) 0.045 Uiso 1 calc R . 
C78 C 0.7960(5) 0.4505(4) 1.0814(10) 0.056(3) Uani 1 d . . 
H78 H 0.7583(5) 0.4593(4) 1.0862(10) 0.067 Uiso 1 calc R . 
C79 C 0.8363(5) 0.4737(4) 1.1330(9) 0.053(3) Uani 1 d . . 
H79 H 0.8267(5) 0.4984(4) 1.1715(9) 0.064 Uiso 1 calc R . 
C80 C 0.8910(5) 0.4589(3) 1.1251(8) 0.046(3) Uani 1 d . . 
H80 H 0.9188(5) 0.4740(3) 1.1598(8) 0.055 Uiso 1 calc R . 
B3 B 1.2615(6) 0.3796(5) 0.7524(12) 0.063(4) Uani 1 d . . 
F11 F 1.2443(4) 0.4084(4) 0.8219(8) 0.139(5) Uani 1 d . . 
F12 F 1.2442(4) 0.3976(3) 0.6692(8) 0.106(3) Uani 1 d . . 
F13 F 1.3169(3) 0.3751(3) 0.7521(6) 0.085(3) Uani 1 d . . 
F14 F 1.2340(3) 0.3380(2) 0.7679(5) 0.064(2) Uani 1 d . . 
B4 B 0.6494(6) 0.1072(5) 0.3498(10) 0.051(4) Uani 1 d . . 
F15 F 0.6776(4) 0.0872(3) 0.2763(5) 0.082(2) Uani 1 d . . 
F16 F 0.5955(3) 0.1180(3) 0.3300(6) 0.085(2) Uani 1 d . . 
F17 F 0.6519(3) 0.0752(3) 0.4240(5) 0.083(2) Uani 1 d . . 
F18 F 0.6768(4) 0.1451(3) 0.3761(8) 0.112(4) Uani 1 d . . 
C81 C 0.6831(5) 0.1927(5) 0.5777(11) 0.077(4) Uani 1 d D . 
H81A H 0.6908(5) 0.1623(5) 0.6023(11) 0.092 Uiso 1 calc R . 
H81B H 0.6648(5) 0.1892(5) 0.5166(11) 0.092 Uiso 1 calc R . 
Cl1 Cl 0.7469(2) 0.22139(14) 0.5620(4) 0.1065(15) Uani 1 d D . 
Cl2 Cl 0.6372(2) 0.22085(14) 0.6548(3) 0.0868(12) Uani 1 d D . 
C82A C 0.6444(10) 0.6416(10) 0.4513(17) 0.123(9) Uiso 0.80(2) d PD 1 
H82A H 0.6396(10) 0.6091(10) 0.4642(17) 0.148 Uiso 0.80(2) calc PR 1 
H82B H 0.6706(10) 0.6445(10) 0.3986(17) 0.148 Uiso 0.80(2) calc PR 1 
Cl3A Cl 0.6734(2) 0.6672(3) 0.5490(4) 0.081(2) Uani 0.80(2) d PD 1 
Cl4A Cl 0.5802(3) 0.6644(2) 0.4188(4) 0.086(2) Uani 0.80(2) d PD 1 
C82B C 0.6410(37) 0.6213(19) 0.4937(81) 0.123(9) Uiso 0.20(2) d PD 2 
H82C H 0.6657(37) 0.6008(19) 0.4588(81) 0.148 Uiso 0.20(2) calc PR 2 
H82D H 0.6286(37) 0.6056(19) 0.5505(81) 0.148 Uiso 0.20(2) calc PR 2 
Cl3B Cl 0.6787(26) 0.6696(21) 0.5257(61) 0.347(63) Uani 0.20(2) d PD 2 
Cl4B Cl 0.5832(24) 0.6341(33) 0.4252(32) 0.386(61) Uani 0.20(2) d PD 2 
C83A C 0.7711(10) 0.2224(12) 1.3167(16) 0.124(10) Uiso 0.69(2) d PD 1 
H83A H 0.7505(10) 0.1940(12) 1.3243(16) 0.149 Uiso 0.69(2) calc PR 1 
H83B H 0.7552(10) 0.2445(12) 1.3606(16) 0.149 Uiso 0.69(2) calc PR 1 
Cl5A Cl 0.7609(6) 0.2417(4) 1.2055(9) 0.140(3) Uiso 0.69(2) d PD 1 
Cl6A Cl 0.8413(5) 0.2130(5) 1.3471(11) 0.164(4) Uiso 0.69(2) d PD 1 
C83B C 0.7784(27) 0.2408(20) 1.2955(39) 0.124(10) Uiso 0.31(2) d PD 2 
H83C H 0.7516(27) 0.2398(20) 1.3475(39) 0.149 Uiso 0.31(2) calc PR 2 
H83D H 0.7986(27) 0.2696(20) 1.2996(39) 0.149 Uiso 0.31(2) calc PR 2 
Cl5B Cl 0.7416(13) 0.2391(10) 1.1895(19) 0.140(3) Uiso 0.31(2) d PD 2 
Cl6B Cl 0.8265(12) 0.1962(11) 1.3093(24) 0.164(4) Uiso 0.31(2) d PD 2 
C84A C 0.7204(12) 0.5659(11) -0.0508(30) 0.152(16) Uiso 0.582(13) d PD 1 
H84A H 0.7526(12) 0.5816(11) -0.0784(30) 0.182 Uiso 0.582(13) calc PR 1 
H84B H 0.7318(12) 0.5537(11) 0.0103(30) 0.182 Uiso 0.582(13) calc PR 1 
Cl7A Cl 0.6643(4) 0.6049(3) -0.0350(7) 0.105(4) Uiso 0.582(13) d PD 1 
Cl8A Cl 0.7002(4) 0.5220(4) -0.1233(7) 0.125(4) Uiso 0.582(13) d PD 1 
C84B C 0.7321(14) 0.5342(9) -0.0936(40) 0.126(17) Uiso 0.418(13) d PD 2 
H84C H 0.7609(14) 0.5415(9) -0.1403(40) 0.152 Uiso 0.418(13) calc PR 2 
H84D H 0.7514(14) 0.5291(9) -0.0338(40) 0.152 Uiso 0.418(13) calc PR 2 
Cl7B Cl 0.6897(7) 0.5811(5) -0.0808(12) 0.138(6) Uiso 0.418(13) d PD 2 
Cl8B Cl 0.7010(7) 0.4844(6) -0.1263(11) 0.142(7) Uiso 0.418(13) d PD 2 
 
loop_ 
 _atom_site_aniso_label 
 _atom_site_aniso_U_11 
 _atom_site_aniso_U_22 
 _atom_site_aniso_U_33 
 _atom_site_aniso_U_23 
 _atom_site_aniso_U_13 
 _atom_site_aniso_U_12 
Cr1 0.0290(8) 0.0297(8) 0.0257(9) -0.0002(7) -0.0018(7) 0.0012(7) 
Cr2 0.0291(8) 0.0279(8) 0.0234(9) 0.0007(7) -0.0019(7) 0.0013(7) 
Cr3 0.0388(9) 0.0404(9) 0.0268(9) -0.0021(7) -0.0002(7) 0.0087(8) 
B1 0.038(7) 0.052(8) 0.035(8) -0.019(6) -0.005(6) -0.007(6) 
F1 0.048(4) 0.051(4) 0.034(4) -0.005(3) 0.001(3) 0.002(3) 
F2 0.071(5) 0.117(7) 0.055(5) -0.016(4) 0.022(4) -0.029(5) 
F3 0.107(6) 0.060(5) 0.072(5) -0.032(4) -0.021(5) 0.021(4) 
F4 0.072(5) 0.083(5) 0.051(4) -0.023(4) -0.023(4) 0.023(4) 
F5 0.066(4) 0.059(4) 0.023(3) -0.013(3) 0.000(3) 0.012(3) 
N1 0.020(4) 0.043(5) 0.025(5) -0.004(4) -0.001(3) 0.000(4) 
N2 0.034(5) 0.032(4) 0.032(5) -0.003(4) -0.004(4) -0.002(4) 
N3 0.049(5) 0.034(5) 0.032(6) -0.002(4) -0.004(4) 0.005(4) 
N4 0.026(5) 0.044(5) 0.035(6) -0.002(4) -0.011(4) 0.005(4) 
N5 0.037(5) 0.030(4) 0.027(5) 0.000(4) -0.003(4) -0.001(4) 
N6 0.037(5) 0.043(5) 0.022(5) 0.006(4) -0.004(4) 0.002(4) 
N7 0.056(6) 0.025(5) 0.030(5) -0.001(4) -0.002(4) 0.007(4) 
N8 0.031(5) 0.041(5) 0.024(5) 0.001(4) 0.010(4) 0.002(4) 
N9 0.032(5) 0.037(5) 0.041(5) 0.008(4) 0.002(4) 0.011(4) 
N10 0.038(5) 0.030(4) 0.024(5) 0.007(4) -0.001(4) -0.003(4) 
N11 0.038(5) 0.030(5) 0.025(5) -0.005(4) -0.004(4) 0.006(4) 
N12 0.044(5) 0.034(5) 0.025(5) -0.007(4) -0.002(4) 0.009(4) 
C1 0.029(6) 0.047(7) 0.030(7) -0.009(5) 0.009(5) 0.000(5) 
C2 0.056(7) 0.048(7) 0.024(6) 0.006(5) -0.009(5) -0.006(6) 
C3 0.049(7) 0.050(7) 0.047(8) 0.012(6) -0.001(6) -0.004(6) 
C4 0.055(7) 0.024(5) 0.041(7) 0.007(5) -0.006(5) -0.003(5) 
C5 0.044(6) 0.030(6) 0.030(6) 0.001(5) 0.001(5) -0.003(5) 
C6 0.047(7) 0.027(6) 0.051(8) 0.002(5) -0.014(6) 0.009(5) 
C7 0.043(6) 0.041(6) 0.047(7) -0.006(5) -0.009(5) -0.016(5) 
C8 0.036(7) 0.043(7) 0.080(10) -0.005(6) -0.024(6) -0.005(5) 
C9 0.047(7) 0.050(7) 0.046(8) -0.006(6) -0.013(6) -0.011(6) 
C10 0.051(7) 0.033(6) 0.057(8) -0.026(5) -0.013(6) 0.008(6) 
C11 0.036(6) 0.059(7) 0.021(6) -0.009(5) 0.011(5) 0.016(5) 
C12 0.026(6) 0.087(9) 0.044(8) -0.001(6) 0.004(5) 0.010(6) 
C13 0.031(6) 0.076(9) 0.053(8) 0.008(6) -0.007(6) 0.005(6) 
C14 0.039(6) 0.059(7) 0.019(6) 0.010(5) -0.002(5) 0.000(5) 
C15 0.030(5) 0.030(5) 0.028(6) -0.003(4) -0.007(5) 0.010(4) 
C16 0.017(5) 0.029(5) 0.035(6) 0.002(5) -0.006(4) -0.009(4) 
C17 0.039(6) 0.048(7) 0.043(7) 0.012(5) 0.001(5) -0.002(5) 
C18 0.059(8) 0.068(8) 0.037(8) 0.019(6) -0.006(6) 0.014(7) 
C19 0.047(7) 0.087(9) 0.031(7) 0.017(6) -0.003(5) 0.016(7) 
C20 0.040(7) 0.070(8) 0.031(7) 0.001(6) 0.004(5) 0.010(6) 
C21 0.063(7) 0.032(6) 0.031(6) 0.010(5) -0.004(5) 0.010(5) 
C22 0.073(9) 0.044(8) 0.049(8) -0.004(6) -0.004(6) 0.007(6) 
C23 0.076(8) 0.034(6) 0.059(8) 0.017(6) 0.001(7) 0.000(6) 
C24 0.041(7) 0.045(7) 0.050(7) 0.005(6) 0.007(5) 0.003(5) 
C25 0.036(6) 0.032(6) 0.043(7) 0.011(5) 0.006(5) -0.004(5) 
C26 0.040(6) 0.035(6) 0.035(7) 0.005(5) -0.013(5) -0.004(5) 
C27 0.044(7) 0.051(7) 0.043(7) 0.006(5) 0.006(6) -0.001(6) 
C28 0.053(8) 0.049(8) 0.078(10) 0.021(7) 0.009(7) 0.001(6) 
C29 0.058(9) 0.078(10) 0.055(9) 0.020(8) 0.015(7) 0.010(8) 
C30 0.042(7) 0.057(7) 0.039(7) 0.006(5) 0.012(5) 0.026(6) 
C31 0.044(7) 0.034(6) 0.031(6) 0.002(5) -0.008(5) 0.001(5) 
C32 0.041(7) 0.043(7) 0.040(7) 0.001(5) -0.011(5) -0.004(5) 
C33 0.034(6) 0.043(7) 0.059(8) 0.009(6) -0.009(6) -0.001(5) 
C34 0.031(6) 0.034(6) 0.051(7) -0.018(5) 0.001(5) 0.000(5) 
C35 0.025(5) 0.030(5) 0.032(6) 0.005(5) -0.004(4) 0.004(4) 
C36 0.032(5) 0.026(5) 0.036(6) -0.006(5) -0.003(5) 0.003(4) 
C37 0.044(6) 0.043(7) 0.027(6) -0.004(5) -0.008(5) 0.014(5) 
C38 0.048(6) 0.036(6) 0.053(8) 0.013(6) -0.007(6) 0.014(5) 
C39 0.064(8) 0.045(7) 0.037(7) -0.015(5) -0.014(6) 0.015(6) 
C40 0.049(6) 0.044(6) 0.020(6) -0.001(5) -0.008(5) 0.003(5) 
Cr4 0.0316(8) 0.0290(8) 0.0246(9) 0.0003(7) -0.0018(7) 0.0042(7) 
Cr5 0.0300(8) 0.0283(8) 0.0262(9) 0.0008(7) -0.0002(7) 0.0021(7) 
Cr6 0.0373(9) 0.0293(8) 0.0254(9) -0.0007(7) -0.0013(7) 0.0003(7) 
B2 0.035(7) 0.044(7) 0.044(8) 0.002(6) -0.014(6) 0.008(6) 
F6 0.058(4) 0.038(3) 0.034(3) -0.001(3) -0.009(3) 0.002(3) 
F7 0.063(5) 0.130(7) 0.081(6) 0.009(5) -0.031(4) -0.034(5) 
F8 0.095(6) 0.097(6) 0.053(5) 0.017(4) -0.039(4) -0.011(5) 
F9 0.134(8) 0.114(7) 0.070(6) -0.044(5) -0.019(5) 0.077(6) 
F10 0.058(4) 0.041(3) 0.023(3) -0.002(2) -0.009(3) 0.000(3) 
N13 0.038(5) 0.033(5) 0.025(5) -0.003(4) -0.004(4) 0.003(4) 
N14 0.039(5) 0.031(5) 0.023(5) 0.001(4) -0.002(4) 0.009(4) 
N15 0.040(5) 0.034(5) 0.031(5) -0.014(4) -0.001(4) -0.001(4) 
N16 0.024(4) 0.042(5) 0.015(4) 0.002(3) -0.001(3) -0.001(4) 
N17 0.026(4) 0.039(5) 0.019(5) -0.003(4) -0.005(3) 0.001(4) 
N18 0.034(5) 0.038(5) 0.026(5) -0.001(4) -0.002(4) 0.003(4) 
N19 0.031(4) 0.033(5) 0.023(5) 0.003(4) -0.006(3) 0.003(4) 
N20 0.036(5) 0.033(4) 0.011(4) 0.001(3) -0.003(3) 0.001(4) 
N21 0.042(5) 0.033(5) 0.026(5) 0.006(4) 0.005(4) 0.011(4) 
N22 0.030(5) 0.037(5) 0.033(5) -0.002(4) -0.010(4) 0.005(4) 
N23 0.041(5) 0.032(5) 0.022(5) 0.002(4) 0.000(4) -0.006(4) 
N24 0.038(5) 0.033(4) 0.025(5) -0.001(4) 0.009(4) 0.010(4) 
C41 0.042(7) 0.057(8) 0.047(7) -0.005(6) -0.012(6) 0.010(6) 
C42 0.068(9) 0.057(8) 0.061(9) -0.013(6) -0.044(7) 0.019(7) 
C43 0.071(9) 0.055(8) 0.075(10) -0.016(7) -0.043(8) 0.032(7) 
C44 0.051(7) 0.043(6) 0.048(7) -0.013(6) -0.006(6) 0.024(5) 
C45 0.046(6) 0.025(5) 0.020(5) -0.004(4) 0.003(5) 0.012(5) 
C46 0.031(5) 0.040(6) 0.022(6) 0.001(5) -0.014(5) 0.001(4) 
C47 0.059(8) 0.051(8) 0.033(7) 0.009(5) -0.001(6) -0.004(6) 
C48 0.077(9) 0.049(7) 0.063(9) 0.019(7) -0.016(7) -0.029(7) 
C49 0.086(10) 0.039(7) 0.047(8) -0.001(6) 0.000(7) -0.013(6) 
C50 0.049(7) 0.041(7) 0.045(7) -0.001(5) -0.002(5) -0.006(6) 
C51 0.039(6) 0.040(6) 0.021(6) 0.011(4) -0.001(4) 0.007(5) 
C52 0.056(7) 0.055(7) 0.025(6) 0.009(5) 0.010(5) 0.000(6) 
C53 0.035(6) 0.047(7) 0.036(7) 0.015(5) 0.009(5) -0.007(5) 
C54 0.033(6) 0.048(6) 0.029(6) 0.003(5) 0.000(4) -0.014(5) 
C55 0.044(6) 0.019(5) 0.028(6) 0.004(4) 0.012(5) -0.004(4) 
C56 0.033(6) 0.042(6) 0.019(6) 0.000(4) -0.001(4) -0.008(5) 
C57 0.035(6) 0.060(7) 0.033(6) 0.001(5) -0.011(5) 0.007(5) 
C58 0.031(6) 0.049(7) 0.067(9) 0.016(6) 0.002(6) 0.013(5) 
C59 0.031(6) 0.053(7) 0.045(7) -0.002(5) -0.014(5) 0.002(5) 
C60 0.041(7) 0.043(6) 0.034(6) 0.002(5) -0.011(5) -0.001(5) 
C61 0.035(6) 0.045(6) 0.019(5) -0.011(5) -0.002(4) 0.003(5) 
C62 0.065(8) 0.038(6) 0.037(7) -0.001(5) -0.005(6) 0.018(6) 
C63 0.059(8) 0.051(8) 0.047(8) 0.000(6) -0.008(6) 0.027(6) 
C64 0.053(7) 0.033(6) 0.033(6) -0.006(5) -0.009(5) 0.020(5) 
C65 0.026(5) 0.033(5) 0.019(5) -0.002(4) 0.000(4) 0.010(4) 
C66 0.038(6) 0.023(5) 0.031(6) 0.004(5) 0.003(5) 0.004(4) 
C67 0.074(8) 0.037(6) 0.033(7) 0.005(5) 0.007(6) -0.004(6) 
C68 0.122(12) 0.042(7) 0.032(8) 0.011(6) 0.027(7) 0.000(7) 
C69 0.069(8) 0.052(7) 0.034(7) 0.008(6) 0.003(6) 0.006(6) 
C70 0.074(8) 0.033(6) 0.019(6) 0.000(4) 0.011(5) 0.016(6) 
C71 0.026(5) 0.037(6) 0.044(7) 0.004(5) -0.017(5) -0.004(5) 
C72 0.047(7) 0.035(6) 0.049(7) -0.006(5) -0.004(6) -0.017(5) 
C73 0.035(6) 0.044(7) 0.057(8) 0.008(6) 0.001(5) -0.007(5) 
C74 0.040(6) 0.035(6) 0.047(7) -0.001(5) 0.008(5) -0.015(5) 
C75 0.031(6) 0.031(5) 0.039(7) 0.006(5) -0.003(5) 0.009(4) 
C76 0.044(7) 0.034(6) 0.031(6) 0.003(5) 0.000(5) 0.003(5) 
C77 0.027(6) 0.037(6) 0.049(7) -0.007(5) 0.003(5) -0.001(5) 
C78 0.037(7) 0.044(7) 0.087(10) 0.008(7) 0.010(7) 0.010(5) 
C79 0.057(8) 0.042(7) 0.061(9) -0.009(6) 0.013(6) 0.000(6) 
C80 0.058(8) 0.032(6) 0.048(7) -0.005(5) -0.006(6) 0.004(6) 
B3 0.051(10) 0.063(10) 0.075(12) 0.000(9) 0.008(8) -0.016(8) 
F11 0.124(8) 0.131(9) 0.163(11) -0.086(8) 0.080(8) -0.075(7) 
F12 0.101(7) 0.092(6) 0.125(8) 0.040(6) -0.034(6) -0.024(5) 
F13 0.037(4) 0.104(6) 0.114(7) 0.029(5) 0.005(4) -0.013(4) 
F14 0.060(4) 0.066(4) 0.066(5) -0.005(4) 0.012(4) -0.012(4) 
B4 0.054(9) 0.051(9) 0.048(9) 0.003(6) -0.016(7) 0.003(7) 
F15 0.126(7) 0.076(5) 0.044(4) -0.001(4) 0.022(5) 0.027(5) 
F16 0.071(5) 0.103(7) 0.080(6) 0.003(5) -0.010(4) 0.004(5) 
F17 0.104(6) 0.097(6) 0.047(5) 0.022(4) 0.020(4) 0.029(5) 
F18 0.108(7) 0.060(5) 0.168(10) -0.031(6) -0.034(7) -0.013(5) 
C81 0.075(10) 0.075(10) 0.080(11) -0.007(8) 0.005(8) -0.008(8) 
Cl1 0.120(4) 0.073(3) 0.127(4) 0.004(3) 0.045(3) -0.006(2) 
Cl2 0.083(3) 0.095(3) 0.082(3) 0.010(2) 0.007(2) 0.018(2) 
Cl3A 0.041(3) 0.135(6) 0.066(4) 0.004(3) 0.017(2) -0.016(3) 
Cl4A 0.091(4) 0.107(5) 0.061(4) -0.009(3) -0.016(3) 0.010(4) 
Cl3B 0.390(97) 0.144(46) 0.508(138) -0.131(64) 0.228(95) -0.091(52) 
Cl4B 0.387(81) 0.597(121) 0.173(42) -0.235(61) 0.217(52) -0.388(88) 
 
_geom_special_details 
; 
 All esds (except the esd in the dihedral angle between two l.s. planes) 
 are estimated using the full covariance matrix.  The cell esds are taken 
 into account individually in the estimation of esds in distances, angles 
 and torsion angles; correlations between esds in cell parameters are only 
 used when they are defined by crystal symmetry.  An approximate (isotropic) 
 treatment of cell esds is used for estimating esds involving l.s. planes. 
; 
 
loop_ 
 _geom_bond_atom_site_label_1 
 _geom_bond_atom_site_label_2 
 _geom_bond_distance 
 _geom_bond_site_symmetry_2 
 _geom_bond_publ_flag 
Cr1 Cr2 1.900(2) . ? 
Cr1 N7 2.052(8) . ? 
Cr1 N1 2.064(8) . ? 
Cr1 N4 2.073(8) . ? 
Cr1 N10 2.083(8) . ? 
Cr1 F1 2.205(6) . ? 
Cr2 N5 1.997(8) . ? 
Cr2 N8 2.002(8) . ? 
Cr2 N2 2.015(8) . ? 
Cr2 N11 2.026(8) . ? 
Cr2 Cr3 2.595(2) . ? 
Cr3 F5 1.821(6) . ? 
Cr3 N3 2.038(9) . ? 
Cr3 N6 2.049(8) . ? 
Cr3 N12 2.050(8) . ? 
Cr3 N9 2.052(8) . ? 
B1 F3 1.331(14) . ? 
B1 F2 1.353(14) . ? 
B1 F4 1.376(14) . ? 
B1 F1 1.441(14) . ? 
N1 C5 1.360(12) . ? 
N1 C1 1.361(13) . ? 
N2 C5 1.388(13) . ? 
N2 C6 1.406(13) . ? 
N3 C6 1.337(14) . ? 
N3 C10 1.376(13) . ? 
N4 C15 1.358(12) . ? 
N4 C11 1.365(12) . ? 
N5 C16 1.377(13) . ? 
N5 C15 1.391(12) . ? 
N6 C20 1.353(13) . ? 
N6 C16 1.368(12) . ? 
N7 C25 1.358(13) . ? 
N7 C21 1.361(13) . ? 
N8 C26 1.374(13) . ? 
N8 C25 1.396(13) . ? 
N9 C26 1.372(13) . ? 
N9 C30 1.373(13) . ? 
N10 C31 1.354(12) . ? 
N10 C35 1.369(12) . ? 
N11 C36 1.365(12) . ? 
N11 C35 1.365(12) . ? 
N12 C40 1.357(13) . ? 
N12 C36 1.394(12) . ? 
C1 C2 1.330(14) . ? 
C2 C3 1.40(2) . ? 
C3 C4 1.38(2) . ? 
C4 C5 1.402(13) . ? 
C6 C7 1.399(15) . ? 
C7 C8 1.380(15) . ? 
C8 C9 1.39(2) . ? 
C9 C10 1.34(2) . ? 
C11 C12 1.363(15) . ? 
C12 C13 1.38(2) . ? 
C13 C14 1.388(15) . ? 
C14 C15 1.389(13) . ? 
C16 C17 1.416(14) . ? 
C17 C18 1.347(15) . ? 
C18 C19 1.38(2) . ? 
C19 C20 1.36(2) . ? 
C21 C22 1.38(2) . ? 
C22 C23 1.39(2) . ? 
C23 C24 1.35(2) . ? 
C24 C25 1.406(14) . ? 
C26 C27 1.408(15) . ? 
C27 C28 1.37(2) . ? 
C28 C29 1.35(2) . ? 
C29 C30 1.37(2) . ? 
C31 C32 1.360(14) . ? 
C32 C33 1.38(2) . ? 
C33 C34 1.359(14) . ? 
C34 C35 1.419(13) . ? 
C36 C37 1.404(13) . ? 
C37 C38 1.377(15) . ? 
C38 C39 1.388(15) . ? 
C39 C40 1.359(14) . ? 
Cr4 Cr5 1.903(2) . ? 
Cr4 N22 2.078(8) . ? 
Cr4 N19 2.085(8) . ? 
Cr4 N16 2.088(8) . ? 
Cr4 N13 2.090(8) . ? 
Cr4 F6 2.193(6) . ? 
Cr5 N17 1.997(7) . ? 
Cr5 N23 1.999(8) . ? 
Cr5 N20 2.000(8) . ? 
Cr5 N14 2.015(8) . ? 
Cr5 Cr6 2.579(2) . ? 
Cr6 F10 1.810(5) . ? 
Cr6 N15 2.043(9) . ? 
Cr6 N18 2.052(8) . ? 
Cr6 N21 2.061(8) . ? 
Cr6 N24 2.073(8) . ? 
B2 F9 1.297(14) . ? 
B2 F7 1.338(14) . ? 
B2 F8 1.368(15) . ? 
B2 F6 1.476(14) . ? 
N13 C41 1.336(13) . ? 
N13 C45 1.386(12) . ? 
N14 C45 1.364(12) . ? 
N14 C46 1.421(12) . ? 
N15 C46 1.343(12) . ? 
N15 C50 1.367(13) . ? 
N16 C55 1.365(12) . ? 
N16 C51 1.366(12) . ? 
N17 C56 1.368(12) . ? 
N17 C55 1.392(12) . ? 
N18 C56 1.350(12) . ? 
N18 C60 1.382(12) . ? 
N19 C61 1.370(12) . ? 
N19 C65 1.370(12) . ? 
N20 C65 1.383(11) . ? 
N20 C66 1.385(12) . ? 
N21 C70 1.343(12) . ? 
N21 C66 1.347(12) . ? 
N22 C71 1.363(12) . ? 
N22 C75 1.384(13) . ? 
N23 C76 1.347(13) . ? 
N23 C75 1.400(12) . ? 
N24 C80 1.382(13) . ? 
N24 C76 1.386(13) . ? 
C41 C42 1.34(2) . ? 
C42 C43 1.40(2) . ? 
C43 C44 1.36(2) . ? 
C44 C45 1.390(14) . ? 
C46 C47 1.385(14) . ? 
C47 C48 1.36(2) . ? 
C48 C49 1.37(2) . ? 
C49 C50 1.36(2) . ? 
C51 C52 1.375(14) . ? 
C52 C53 1.37(2) . ? 
C53 C54 1.383(15) . ? 
C54 C55 1.383(13) . ? 
C56 C57 1.404(14) . ? 
C57 C58 1.392(15) . ? 
C58 C59 1.41(2) . ? 
C59 C60 1.364(14) . ? 
C61 C62 1.386(14) . ? 
C62 C63 1.40(2) . ? 
C63 C64 1.370(15) . ? 
C64 C65 1.371(13) . ? 
C66 C67 1.402(14) . ? 
C67 C68 1.35(2) . ? 
C68 C69 1.37(2) . ? 
C69 C70 1.381(15) . ? 
C71 C72 1.367(14) . ? 
C72 C73 1.35(2) . ? 
C73 C74 1.367(15) . ? 
C74 C75 1.379(14) . ? 
C76 C77 1.411(14) . ? 
C77 C78 1.36(2) . ? 
C78 C79 1.39(2) . ? 
C79 C80 1.38(2) . ? 
B3 F13 1.33(2) . ? 
B3 F12 1.36(2) . ? 
B3 F11 1.37(2) . ? 
B3 F14 1.41(2) . ? 
B4 F18 1.35(2) . ? 
B4 F16 1.35(2) . ? 
B4 F15 1.38(2) . ? 
B4 F17 1.42(2) . ? 
C81 Cl1 1.755(13) . ? 
C81 Cl2 1.761(13) . ? 
C82A Cl3A 1.73(2) . ? 
C82A Cl4A 1.74(2) . ? 
C82B Cl4B 1.73(3) . ? 
C82B Cl3B 1.74(3) . ? 
C83A Cl5A 1.70(2) . ? 
C83A Cl6A 1.75(2) . ? 
C83B Cl5B 1.75(3) . ? 
C83B Cl6B 1.75(3) . ? 
C84A Cl8A 1.73(2) . ? 
C84A Cl7A 1.78(2) . ? 
C84B Cl8B 1.71(2) . ? 
C84B Cl7B 1.72(2) . ? 
 
loop_ 
 _geom_angle_atom_site_label_1 
 _geom_angle_atom_site_label_2 
 _geom_angle_atom_site_label_3 
 _geom_angle 
 _geom_angle_site_symmetry_1 
 _geom_angle_site_symmetry_3 
 _geom_angle_publ_flag 
Cr2 Cr1 N7 91.8(2) . . ? 
Cr2 Cr1 N1 90.8(2) . . ? 
N7 Cr1 N1 176.5(3) . . ? 
Cr2 Cr1 N4 90.6(2) . . ? 
N7 Cr1 N4 92.1(3) . . ? 
N1 Cr1 N4 90.1(3) . . ? 
Cr2 Cr1 N10 91.1(2) . . ? 
N7 Cr1 N10 87.4(3) . . ? 
N1 Cr1 N10 90.3(3) . . ? 
N4 Cr1 N10 178.2(3) . . ? 
Cr2 Cr1 F1 179.1(2) . . ? 
N7 Cr1 F1 89.0(3) . . ? 
N1 Cr1 F1 88.3(3) . . ? 
N4 Cr1 F1 89.2(3) . . ? 
N10 Cr1 F1 89.0(3) . . ? 
Cr1 Cr2 N5 97.8(2) . . ? 
Cr1 Cr2 N8 97.0(2) . . ? 
N5 Cr2 N8 90.1(3) . . ? 
Cr1 Cr2 N2 97.0(2) . . ? 
N5 Cr2 N2 87.8(3) . . ? 
N8 Cr2 N2 166.0(3) . . ? 
Cr1 Cr2 N11 97.0(2) . . ? 
N5 Cr2 N11 165.1(3) . . ? 
N8 Cr2 N11 89.5(3) . . ? 
N2 Cr2 N11 89.0(3) . . ? 
Cr1 Cr2 Cr3 178.74(9) . . ? 
N5 Cr2 Cr3 83.2(2) . . ? 
N8 Cr2 Cr3 83.7(2) . . ? 
N2 Cr2 Cr3 82.3(2) . . ? 
N11 Cr2 Cr3 82.0(2) . . ? 
F5 Cr3 N3 93.8(3) . . ? 
F5 Cr3 N6 94.3(3) . . ? 
N3 Cr3 N6 89.0(3) . . ? 
F5 Cr3 N12 93.2(3) . . ? 
N3 Cr3 N12 88.7(3) . . ? 
N6 Cr3 N12 172.2(3) . . ? 
F5 Cr3 N9 94.6(3) . . ? 
N3 Cr3 N9 171.5(3) . . ? 
N6 Cr3 N9 90.1(3) . . ? 
N12 Cr3 N9 91.1(3) . . ? 
F5 Cr3 Cr2 179.2(2) . . ? 
N3 Cr3 Cr2 87.0(2) . . ? 
N6 Cr3 Cr2 85.6(2) . . ? 
N12 Cr3 Cr2 86.9(2) . . ? 
N9 Cr3 Cr2 84.6(2) . . ? 
F3 B1 F2 113.9(10) . . ? 
F3 B1 F4 110.1(9) . . ? 
F2 B1 F4 108.9(11) . . ? 
F3 B1 F1 108.9(10) . . ? 
F2 B1 F1 108.2(8) . . ? 
F4 B1 F1 106.5(9) . . ? 
B1 F1 Cr1 169.4(7) . . ? 
C5 N1 C1 117.1(9) . . ? 
C5 N1 Cr1 118.8(6) . . ? 
C1 N1 Cr1 123.9(7) . . ? 
C5 N2 C6 122.8(8) . . ? 
C5 N2 Cr2 114.0(6) . . ? 
C6 N2 Cr2 123.1(7) . . ? 
C6 N3 C10 118.2(10) . . ? 
C6 N3 Cr3 121.7(7) . . ? 
C10 N3 Cr3 120.2(7) . . ? 
C15 N4 C11 118.9(8) . . ? 
C15 N4 Cr1 118.6(6) . . ? 
C11 N4 Cr1 122.2(6) . . ? 
C16 N5 C15 122.0(8) . . ? 
C16 N5 Cr2 124.0(6) . . ? 
C15 N5 Cr2 113.9(6) . . ? 
C20 N6 C16 119.4(9) . . ? 
C20 N6 Cr3 118.7(7) . . ? 
C16 N6 Cr3 121.9(6) . . ? 
C25 N7 C21 118.7(9) . . ? 
C25 N7 Cr1 118.6(6) . . ? 
C21 N7 Cr1 122.7(7) . . ? 
C26 N8 C25 121.0(8) . . ? 
C26 N8 Cr2 122.9(7) . . ? 
C25 N8 Cr2 114.7(6) . . ? 
C26 N9 C30 117.9(9) . . ? 
C26 N9 Cr3 123.9(7) . . ? 
C30 N9 Cr3 118.0(8) . . ? 
C31 N10 C35 119.1(8) . . ? 
C31 N10 Cr1 124.2(7) . . ? 
C35 N10 Cr1 116.6(6) . . ? 
C36 N11 C35 121.9(8) . . ? 
C36 N11 Cr2 124.1(6) . . ? 
C35 N11 Cr2 113.4(6) . . ? 
C40 N12 C36 118.7(8) . . ? 
C40 N12 Cr3 119.9(7) . . ? 
C36 N12 Cr3 120.7(6) . . ? 
C2 C1 N1 124.4(10) . . ? 
C1 C2 C3 118.9(10) . . ? 
C4 C3 C2 119.5(10) . . ? 
C3 C4 C5 118.3(10) . . ? 
N1 C5 N2 112.5(8) . . ? 
N1 C5 C4 121.8(9) . . ? 
N2 C5 C4 125.5(9) . . ? 
N3 C6 C7 121.6(10) . . ? 
N3 C6 N2 116.2(9) . . ? 
C7 C6 N2 122.1(11) . . ? 
C8 C7 C6 118.3(11) . . ? 
C7 C8 C9 120.0(11) . . ? 
C10 C9 C8 118.5(11) . . ? 
C9 C10 N3 123.2(11) . . ? 
C12 C11 N4 121.5(10) . . ? 
C11 C12 C13 120.0(10) . . ? 
C12 C13 C14 119.2(10) . . ? 
C13 C14 C15 118.8(9) . . ? 
N4 C15 C14 121.5(9) . . ? 
N4 C15 N5 112.8(8) . . ? 
C14 C15 N5 125.6(9) . . ? 
N6 C16 N5 115.5(8) . . ? 
N6 C16 C17 118.1(9) . . ? 
N5 C16 C17 126.2(9) . . ? 
C18 C17 C16 121.2(11) . . ? 
C17 C18 C19 119.5(11) . . ? 
C20 C19 C18 119.1(11) . . ? 
N6 C20 C19 122.7(10) . . ? 
N7 C21 C22 121.9(11) . . ? 
C21 C22 C23 118.8(11) . . ? 
C24 C23 C22 120.4(11) . . ? 
C23 C24 C25 119.3(11) . . ? 
N7 C25 N8 112.7(8) . . ? 
N7 C25 C24 120.9(10) . . ? 
N8 C25 C24 126.4(10) . . ? 
N9 C26 N8 113.5(8) . . ? 
N9 C26 C27 119.8(10) . . ? 
N8 C26 C27 126.7(10) . . ? 
C28 C27 C26 119.7(11) . . ? 
C29 C28 C27 120.5(12) . . ? 
C28 C29 C30 119.4(12) . . ? 
C29 C30 N9 122.7(12) . . ? 
N10 C31 C32 122.3(10) . . ? 
C31 C32 C33 119.2(10) . . ? 
C34 C33 C32 120.8(10) . . ? 
C33 C34 C35 118.7(9) . . ? 
N11 C35 N10 114.8(8) . . ? 
N11 C35 C34 124.9(9) . . ? 
N10 C35 C34 120.0(9) . . ? 
N11 C36 N12 114.8(8) . . ? 
N11 C36 C37 125.1(9) . . ? 
N12 C36 C37 119.9(8) . . ? 
C38 C37 C36 119.2(9) . . ? 
C37 C38 C39 120.2(10) . . ? 
C40 C39 C38 119.3(10) . . ? 
N12 C40 C39 122.6(10) . . ? 
Cr5 Cr4 N22 90.8(2) . . ? 
Cr5 Cr4 N19 90.1(2) . . ? 
N22 Cr4 N19 88.4(3) . . ? 
Cr5 Cr4 N16 90.5(2) . . ? 
N22 Cr4 N16 178.0(3) . . ? 
N19 Cr4 N16 90.0(3) . . ? 
Cr5 Cr4 N13 90.5(2) . . ? 
N22 Cr4 N13 90.6(3) . . ? 
N19 Cr4 N13 178.8(3) . . ? 
N16 Cr4 N13 91.0(3) . . ? 
Cr5 Cr4 F6 179.6(2) . . ? 
N22 Cr4 F6 89.6(3) . . ? 
N19 Cr4 F6 89.7(3) . . ? 
N16 Cr4 F6 89.1(3) . . ? 
N13 Cr4 F6 89.7(3) . . ? 
Cr4 Cr5 N17 97.8(2) . . ? 
Cr4 Cr5 N23 96.5(2) . . ? 
N17 Cr5 N23 165.7(3) . . ? 
Cr4 Cr5 N20 97.4(2) . . ? 
N17 Cr5 N20 89.0(3) . . ? 
N23 Cr5 N20 89.2(3) . . ? 
Cr4 Cr5 N14 97.3(2) . . ? 
N17 Cr5 N14 89.1(3) . . ? 
N23 Cr5 N14 89.1(3) . . ? 
N20 Cr5 N14 165.4(3) . . ? 
Cr4 Cr5 Cr6 179.48(9) . . ? 
N17 Cr5 Cr6 82.6(2) . . ? 
N23 Cr5 Cr6 83.2(2) . . ? 
N20 Cr5 Cr6 83.0(2) . . ? 
N14 Cr5 Cr6 82.3(2) . . ? 
F10 Cr6 N15 94.3(3) . . ? 
F10 Cr6 N18 96.8(3) . . ? 
N15 Cr6 N18 89.5(3) . . ? 
F10 Cr6 N21 94.7(3) . . ? 
N15 Cr6 N21 171.0(3) . . ? 
N18 Cr6 N21 89.1(3) . . ? 
F10 Cr6 N24 93.4(3) . . ? 
N15 Cr6 N24 90.1(3) . . ? 
N18 Cr6 N24 169.8(3) . . ? 
N21 Cr6 N24 89.8(3) . . ? 
F10 Cr6 Cr5 178.2(2) . . ? 
N15 Cr6 Cr5 85.8(2) . . ? 
N18 Cr6 Cr5 84.9(2) . . ? 
N21 Cr6 Cr5 85.2(2) . . ? 
N24 Cr6 Cr5 84.9(2) . . ? 
F9 B2 F7 117.1(11) . . ? 
F9 B2 F8 111.7(12) . . ? 
F7 B2 F8 109.4(10) . . ? 
F9 B2 F6 106.8(9) . . ? 
F7 B2 F6 105.9(10) . . ? 
F8 B2 F6 105.1(9) . . ? 
B2 F6 Cr4 168.8(6) . . ? 
C41 N13 C45 118.6(9) . . ? 
C41 N13 Cr4 124.3(7) . . ? 
C45 N13 Cr4 116.8(6) . . ? 
C45 N14 C46 122.4(8) . . ? 
C45 N14 Cr5 113.8(6) . . ? 
C46 N14 Cr5 123.6(6) . . ? 
C46 N15 C50 117.2(9) . . ? 
C46 N15 Cr6 123.6(6) . . ? 
C50 N15 Cr6 119.1(7) . . ? 
C55 N16 C51 120.2(8) . . ? 
C55 N16 Cr4 117.5(6) . . ? 
C51 N16 Cr4 122.3(6) . . ? 
C56 N17 C55 122.1(8) . . ? 
C56 N17 Cr5 122.6(6) . . ? 
C55 N17 Cr5 114.2(6) . . ? 
C56 N18 C60 119.0(9) . . ? 
C56 N18 Cr6 122.5(6) . . ? 
C60 N18 Cr6 118.0(7) . . ? 
C61 N19 C65 119.6(8) . . ? 
C61 N19 Cr4 121.6(6) . . ? 
C65 N19 Cr4 118.8(6) . . ? 
C65 N20 C66 121.0(8) . . ? 
C65 N20 Cr5 114.7(6) . . ? 
C66 N20 Cr5 124.1(6) . . ? 
C70 N21 C66 119.5(8) . . ? 
C70 N21 Cr6 118.1(7) . . ? 
C66 N21 Cr6 122.4(6) . . ? 
C71 N22 C75 118.3(9) . . ? 
C71 N22 Cr4 123.1(7) . . ? 
C75 N22 Cr4 118.5(6) . . ? 
C76 N23 C75 119.8(9) . . ? 
C76 N23 Cr5 124.6(7) . . ? 
C75 N23 Cr5 115.3(6) . . ? 
C80 N24 C76 119.1(9) . . ? 
C80 N24 Cr6 119.4(7) . . ? 
C76 N24 Cr6 121.4(6) . . ? 
N13 C41 C42 124.2(11) . . ? 
C41 C42 C43 117.3(10) . . ? 
C44 C43 C42 121.1(11) . . ? 
C43 C44 C45 119.2(10) . . ? 
N14 C45 N13 113.6(8) . . ? 
N14 C45 C44 126.7(9) . . ? 
N13 C45 C44 119.6(9) . . ? 
N15 C46 C47 122.8(9) . . ? 
N15 C46 N14 112.9(8) . . ? 
C47 C46 N14 124.2(9) . . ? 
C48 C47 C46 117.0(11) . . ? 
C47 C48 C49 122.6(11) . . ? 
C50 C49 C48 117.1(11) . . ? 
C49 C50 N15 123.2(11) . . ? 
N16 C51 C52 120.1(9) . . ? 
C53 C52 C51 120.5(10) . . ? 
C52 C53 C54 119.1(10) . . ? 
C53 C54 C55 120.0(10) . . ? 
N16 C55 C54 120.0(9) . . ? 
N16 C55 N17 113.4(8) . . ? 
C54 C55 N17 126.5(9) . . ? 
N18 C56 N17 114.1(8) . . ? 
N18 C56 C57 122.0(9) . . ? 
N17 C56 C57 123.9(9) . . ? 
C58 C57 C56 117.7(10) . . ? 
C57 C58 C59 121.0(10) . . ? 
C60 C59 C58 117.8(9) . . ? 
C59 C60 N18 122.5(10) . . ? 
N19 C61 C62 122.4(9) . . ? 
C61 C62 C63 117.0(10) . . ? 
C64 C63 C62 120.3(10) . . ? 
C63 C64 C65 121.4(10) . . ? 
C64 C65 N19 119.2(8) . . ? 
C64 C65 N20 128.9(9) . . ? 
N19 C65 N20 111.5(7) . . ? 
N21 C66 N20 114.5(8) . . ? 
N21 C66 C67 120.6(9) . . ? 
N20 C66 C67 124.5(9) . . ? 
C68 C67 C66 118.1(11) . . ? 
C67 C68 C69 122.4(11) . . ? 
C68 C69 C70 117.2(11) . . ? 
N21 C70 C69 122.1(10) . . ? 
N22 C71 C72 122.0(10) . . ? 
C73 C72 C71 119.1(10) . . ? 
C72 C73 C74 121.0(10) . . ? 
C73 C74 C75 119.6(10) . . ? 
C74 C75 N22 120.0(9) . . ? 
C74 C75 N23 129.2(10) . . ? 
N22 C75 N23 110.6(8) . . ? 
N23 C76 N24 114.3(9) . . ? 
N23 C76 C77 127.0(10) . . ? 
N24 C76 C77 118.7(9) . . ? 
C78 C77 C76 120.5(10) . . ? 
C77 C78 C79 121.8(10) . . ? 
C80 C79 C78 117.0(11) . . ? 
C79 C80 N24 122.9(11) . . ? 
F13 B3 F12 109.8(12) . . ? 
F13 B3 F11 111.4(13) . . ? 
F12 B3 F11 107.2(14) . . ? 
F13 B3 F14 112.2(13) . . ? 
F12 B3 F14 109.5(12) . . ? 
F11 B3 F14 106.6(11) . . ? 
F18 B4 F16 108.9(12) . . ? 
F18 B4 F15 109.3(12) . . ? 
F16 B4 F15 113.9(11) . . ? 
F18 B4 F17 108.9(11) . . ? 
F16 B4 F17 110.6(12) . . ? 
F15 B4 F17 105.1(10) . . ? 
Cl1 C81 Cl2 113.1(7) . . ? 
Cl3A C82A Cl4A 113.5(13) . . ? 
Cl4B C82B Cl3B 112.4(23) . . ? 
Cl5A C83A Cl6A 114.9(14) . . ? 
Cl5B C83B Cl6B 113.9(20) . . ? 
Cl8A C84A Cl7A 110.6(15) . . ? 
Cl8B C84B Cl7B 117.6(20) . . ? 
 
loop_ 
 _geom_torsion_atom_site_label_1 
 _geom_torsion_atom_site_label_2 
 _geom_torsion_atom_site_label_3 
 _geom_torsion_atom_site_label_4 
 _geom_torsion 
 _geom_torsion_site_symmetry_1 
 _geom_torsion_site_symmetry_2 
 _geom_torsion_site_symmetry_3 
 _geom_torsion_site_symmetry_4 
 _geom_torsion_publ_flag 
 N1 Cr1 Cr3 N3 -40.2(3) . . . . ? 
 N4 Cr1 Cr3 N6 -39.3(3) . . . . ? 
 N7 Cr1 Cr3 N9 -37.6(3) . . . . ? 
 N10 Cr1 Cr3 N12 -41.6(3) . . . . ? 
 N13 Cr4 Cr6 N15 -43.8(3) . . . . ? 
 N16 Cr4 Cr6 N18 -42.6(3) . . . . ? 
 N19 Cr4 Cr6 N21 -42.0(3) . . . . ? 
 N22 Cr4 Cr6 N24 -43.8(3) . . . . ? 
 
_refine_diff_density_max    0.793 
_refine_diff_density_min   -0.569 
_refine_diff_density_rms    0.092 
 
#===END

data_cmpd_7
 
_audit_creation_method            SHELXL 

_chemical_formula_moiety          ? 
_chemical_formula_structural      '[Cr3(N3C10H8)4ClF][BF4].CH2Cl2.C6H14'
_chemical_formula_analytical      ? 
_chemical_formula_sum             'C47 H48 B Cl3 Cr3 F5 N12' 
_chemical_formula_weight          1149.1
_chemical_compound_source         synthesis
 
loop_ 
 _atom_type_symbol 
 _atom_type_description 
 _atom_type_scat_dispersion_real 
 _atom_type_scat_dispersion_imag 
 _atom_type_scat_source 
 'C'  'C'   0.0033   0.0016 
 'International Tables Vol C Tables 4.2.6.8 and 6.1.1.4' 
 'H'  'H'   0.0000   0.0000 
 'International Tables Vol C Tables 4.2.6.8 and 6.1.1.4' 
 'B'  'B'   0.0013   0.0007 
 'International Tables Vol C Tables 4.2.6.8 and 6.1.1.4' 
 'N'  'N'   0.0061   0.0033 
 'International Tables Vol C Tables 4.2.6.8 and 6.1.1.4' 
 'F'  'F'   0.0171   0.0103 
 'International Tables Vol C Tables 4.2.6.8 and 6.1.1.4' 
 'Cl'  'Cl'   0.1484   0.1585 
 'International Tables Vol C Tables 4.2.6.8 and 6.1.1.4' 
 'Cr'  'Cr'   0.3209   0.6236 
 'International Tables Vol C Tables 4.2.6.8 and 6.1.1.4' 
 
_symmetry_cell_setting            monoclinic
_symmetry_space_group_name_H-M    'P 1 21/n 1'
 
loop_ 
 _symmetry_equiv_pos_as_xyz 
 'x, y, z' 
 '-x+1/2, y+1/2, -z+1/2' 
 '-x, -y, -z' 
 'x-1/2, -y-1/2, z-1/2' 
 
_cell_length_a                    11.499(3) 
_cell_length_b                    20.976(1)
_cell_length_c                    19.862(3) 
_cell_angle_alpha                 90.00 
_cell_angle_beta                  92.804(4) 
_cell_angle_gamma                 90.00 
_cell_volume                      4785.2(16) 
_cell_formula_units_Z             4 
_cell_measurement_temperature     213(2) 
_cell_measurement_reflns_used     250
_cell_measurement_theta_min       5.
_cell_measurement_theta_max       15.7
 
_exptl_crystal_description        block
_exptl_crystal_colour             ? 
_exptl_crystal_size_max           0.50 
_exptl_crystal_size_mid           0.40 
_exptl_crystal_size_min           0.40 
_exptl_crystal_density_meas       'not measured'
_exptl_crystal_density_diffrn     1.595 
_exptl_crystal_density_method     ? 
_exptl_crystal_F_000              2349 
_exptl_absorpt_coefficient_mu     0.906 
_exptl_absorpt_correction_type    none
_exptl_absorpt_correction_T_min   ? 
_exptl_absorpt_correction_T_max   ? 
 
_diffrn_ambient_temperature       213(2) 
_diffrn_radiation_wavelength      0.71073 
_diffrn_radiation_type            MoK\a 
_diffrn_radiation_source          'fine-focus sealed tube' 
_diffrn_radiation_monochromator   graphite 
_diffrn_measurement_device        'Nonius FAST'
_diffrn_measurement_method        'Ellipsoid-mask fitting'
_diffrn_standards_number          0
_diffrn_standards_interval_count  ? 
_diffrn_standards_interval_time   ? 
_diffrn_standards_decay_%         ? 
_diffrn_reflns_number             21183 
_diffrn_reflns_av_R_equivalents   0.0584 
_diffrn_reflns_av_sigmaI/netI     0.0353 
_diffrn_reflns_limit_h_min        -12 
_diffrn_reflns_limit_h_max        12 
_diffrn_reflns_limit_k_min        -22 
_diffrn_reflns_limit_k_max        22 
_diffrn_reflns_limit_l_min        -17 
_diffrn_reflns_limit_l_max        21 
_diffrn_reflns_theta_min          2.20 
_diffrn_reflns_theta_max          22.55 
_reflns_number_total              6262 
_reflns_number_observed           5666 
_reflns_observed_criterion        >2sigma(I) 
 
_computing_data_collection        MADNES
_computing_cell_refinement        MADNES
_computing_data_reduction         PROCOR
_computing_structure_solution     'SHELXS-86 (Sheldrick, 1990)' 
_computing_structure_refinement   'SHELXL-93 (Sheldrick, 1993)' 
_computing_molecular_graphics     'XP (Siemens, 1996)'
_computing_publication_material   'SHELXL-93 (Sheldrick, 1993)' 
 
_refine_special_details 
; 
 Refinement on F^2^ for ALL reflections except for 4 with very negative F^2^ 
 or flagged by the user for potential systematic errors.  Weighted R-factors 
 wR and all goodnesses of fit S are based on F^2^, conventional R-factors R 
 are based on F, with F set to zero for negative F^2^. The observed criterion 
 of F^2^ > 2sigma(F^2^) is used only for calculating _R_factor_obs etc. and is 
 not relevant to the choice of reflections for refinement.  R-factors based 
 on F^2^ are statistically about twice as large as those based on F, and R- 
 factors based on ALL data will be even larger. 
; 
 
_refine_ls_structure_factor_coef  Fsqd  
_refine_ls_matrix_type            full 
_refine_ls_weighting_scheme 
 'calc w=1/[\s^2^(Fo^2^)+(0.0475P)^2^+20.0000P] where P=(Fo^2^+2Fc^2^)/3' 
_atom_sites_solution_primary      direct 
_atom_sites_solution_secondary    difmap 
_atom_sites_solution_hydrogens    geom 
_refine_ls_hydrogen_treatment     noref
_refine_ls_extinction_method      none 
_refine_ls_extinction_coef        ? 
_refine_ls_number_reflns          6258 
_refine_ls_number_parameters      664 
_refine_ls_number_restraints      5 
_refine_ls_R_factor_all           0.0693 
_refine_ls_R_factor_obs           0.0631 
_refine_ls_wR_factor_all          0.1546 
_refine_ls_wR_factor_obs          0.1486 
_refine_ls_goodness_of_fit_all    1.096 
_refine_ls_goodness_of_fit_obs    1.120 
_refine_ls_restrained_S_all       1.102 
_refine_ls_restrained_S_obs       1.120 
_refine_ls_shift/esd_max          0.002 
_refine_ls_shift/esd_mean         0.000 
 
loop_ 
 _atom_site_label 
 _atom_site_type_symbol 
 _atom_site_fract_x 
 _atom_site_fract_y 
 _atom_site_fract_z 
 _atom_site_U_iso_or_equiv 
 _atom_site_thermal_displace_type 
 _atom_site_occupancy 
 _atom_site_calc_flag 
 _atom_site_refinement_flags 
 _atom_site_disorder_group 
Cr1 Cr 0.17526(7) 0.20821(4) 0.65575(4) 0.0311(2) Uani 1 d D . 
Cr3 Cr 0.21717(7) 0.28886(4) 0.86788(4) 0.0368(3) Uani 1 d D . 
Cr2A Cr 0.1933(5) 0.2411(2) 0.7523(2) 0.0293(8) Uani 0.708(9) d PD 1 
Cl1A Cl 0.1511(4) 0.1660(2) 0.5429(2) 0.0412(10) Uani 0.708(9) d PD 1 
F1A F 0.2319(8) 0.3201(5) 0.9569(4) 0.049(2) Uani 0.708(9) d PD 1 
Cr2B Cr 0.1987(11) 0.2558(5) 0.7700(5) 0.027(2) Uani 0.292(9) d PD 2 
F1B F 0.1618(24) 0.1800(12) 0.5647(9) 0.048(6) Uani 0.292(9) d PD 2 
Cl1B Cl 0.2366(8) 0.3429(4) 0.9733(4) 0.036(2) Uani 0.292(9) d PD 2 
N1 N 0.3478(3) 0.1766(2) 0.6685(2) 0.0314(10) Uani 1 d . . 
N2 N 0.3253(4) 0.1857(2) 0.7827(2) 0.0309(9) Uani 1 d . . 
N3 N 0.2980(4) 0.2042(2) 0.8957(2) 0.0380(11) Uani 1 d . . 
N4 N 0.1122(4) 0.1246(2) 0.6988(2) 0.0351(10) Uani 1 d . . 
N5 N 0.0782(4) 0.1847(2) 0.7926(2) 0.0333(10) Uani 1 d . . 
N6 N 0.0495(4) 0.2534(2) 0.8800(2) 0.0377(11) Uani 1 d . . 
N7 N 0.0038(4) 0.2422(2) 0.6539(2) 0.0346(10) Uani 1 d . . 
N8 N 0.0680(4) 0.3087(2) 0.7399(2) 0.0358(10) Uani 1 d . . 
N9 N 0.1397(4) 0.3708(2) 0.8276(2) 0.0449(12) Uani 1 d . . 
N10 N 0.2292(4) 0.2981(2) 0.6219(2) 0.0355(10) Uani 1 d . . 
N11 N 0.3076(4) 0.3114(2) 0.7294(2) 0.0328(10) Uani 1 d . . 
N12 N 0.3789(4) 0.3214(2) 0.8393(2) 0.0381(11) Uani 1 d . . 
C1 C 0.4135(5) 0.1651(3) 0.6153(3) 0.0397(13) Uani 1 d . . 
H1 H 0.3785(5) 0.1698(3) 0.5718(3) 0.048 Uiso 1 calc R . 
C2 C 0.5278(5) 0.1471(3) 0.6208(3) 0.0469(14) Uani 1 d . . 
H2 H 0.5697(5) 0.1387(3) 0.5823(3) 0.056 Uiso 1 calc R . 
C3 C 0.5808(5) 0.1416(3) 0.6856(3) 0.0446(14) Uani 1 d . . 
H3 H 0.6595(5) 0.1300(3) 0.6914(3) 0.054 Uiso 1 calc R . 
C4 C 0.5161(5) 0.1535(3) 0.7406(3) 0.0395(13) Uani 1 d . . 
H4 H 0.5512(5) 0.1501(3) 0.7842(3) 0.047 Uiso 1 calc R . 
C5 C 0.3983(4) 0.1705(2) 0.7324(2) 0.0315(12) Uani 1 d . . 
C6 C 0.3453(4) 0.1655(3) 0.8489(2) 0.0351(12) Uani 1 d . . 
C7 C 0.4020(5) 0.1088(3) 0.8688(3) 0.0427(13) Uani 1 d . . 
H7 H 0.4304(5) 0.0812(3) 0.8362(3) 0.051 Uiso 1 calc R . 
C8 C 0.4158(5) 0.0938(3) 0.9358(3) 0.051(2) Uani 1 d . . 
H8 H 0.4555(5) 0.0564(3) 0.9493(3) 0.062 Uiso 1 calc R . 
C9 C 0.3710(6) 0.1340(3) 0.9836(3) 0.058(2) Uani 1 d . . 
H9 H 0.3810(6) 0.1248(3) 1.0299(3) 0.069 Uiso 1 calc R . 
C10 C 0.3119(5) 0.1872(3) 0.9617(3) 0.0464(14) Uani 1 d . . 
H10 H 0.2790(5) 0.2135(3) 0.9940(3) 0.056 Uiso 1 calc R . 
C11 C 0.1109(5) 0.0681(3) 0.6646(3) 0.0445(14) Uani 1 d . . 
H11 H 0.1487(5) 0.0658(3) 0.6238(3) 0.053 Uiso 1 calc R . 
C12 C 0.0568(6) 0.0152(3) 0.6873(3) 0.054(2) Uani 1 d . . 
H12 H 0.0568(6) -0.0229(3) 0.6625(3) 0.065 Uiso 1 calc R . 
C13 C 0.0013(5) 0.0187(3) 0.7483(3) 0.0485(15) Uani 1 d . . 
H13 H -0.0383(5) -0.0169(3) 0.7645(3) 0.058 Uiso 1 calc R . 
C14 C 0.0051(5) 0.0742(3) 0.7840(3) 0.0409(13) Uani 1 d . . 
H14 H -0.0306(5) 0.0764(3) 0.8256(3) 0.049 Uiso 1 calc R . 
C15 C 0.0613(4) 0.1274(3) 0.7596(2) 0.0346(12) Uani 1 d . . 
C16 C 0.0022(4) 0.2073(2) 0.8390(2) 0.0348(12) Uani 1 d . . 
C17 C -0.1146(5) 0.1902(3) 0.8427(3) 0.0398(13) Uani 1 d . . 
H17 H -0.1461(5) 0.1575(3) 0.8151(3) 0.048 Uiso 1 calc R . 
C18 C -0.1831(5) 0.2211(3) 0.8867(3) 0.050(2) Uani 1 d . . 
H18 H -0.2623(5) 0.2104(3) 0.8887(3) 0.060 Uiso 1 calc R . 
C19 C -0.1353(5) 0.2685(3) 0.9284(3) 0.055(2) Uani 1 d . . 
H19 H -0.1807(5) 0.2900(3) 0.9593(3) 0.066 Uiso 1 calc R . 
C20 C -0.0207(5) 0.2829(3) 0.9231(3) 0.0461(14) Uani 1 d . . 
H20 H 0.0117(5) 0.3153(3) 0.9509(3) 0.055 Uiso 1 calc R . 
C21 C -0.0824(5) 0.2153(3) 0.6152(3) 0.0410(14) Uani 1 d . . 
H21 H -0.0634(5) 0.1828(3) 0.5851(3) 0.049 Uiso 1 calc R . 
C22 C -0.1961(5) 0.2333(3) 0.6179(3) 0.052(2) Uani 1 d . . 
H22 H -0.2536(5) 0.2139(3) 0.5895(3) 0.062 Uiso 1 calc R . 
C23 C -0.2257(5) 0.2796(3) 0.6617(3) 0.057(2) Uani 1 d . . 
H23 H -0.3038(5) 0.2921(3) 0.6644(3) 0.069 Uiso 1 calc R . 
C24 C -0.1394(5) 0.3079(3) 0.7025(3) 0.051(2) Uani 1 d . . 
H24 H -0.1585(5) 0.3400(3) 0.7332(3) 0.062 Uiso 1 calc R . 
C25 C -0.0248(5) 0.2889(3) 0.6979(3) 0.0369(13) Uani 1 d . . 
C26 C 0.0705(5) 0.3675(3) 0.7695(3) 0.0395(13) Uani 1 d . . 
C27 C 0.0155(6) 0.4222(3) 0.7436(3) 0.055(2) Uani 1 d . . 
H27 H -0.0311(6) 0.4197(3) 0.7035(3) 0.066 Uiso 1 calc R . 
C28 C 0.0287(7) 0.4789(3) 0.7760(4) 0.069(2) Uani 1 d . . 
H28 H -0.0096(7) 0.5155(3) 0.7589(4) 0.082 Uiso 1 calc R . 
C29 C 0.0989(7) 0.4822(3) 0.8340(4) 0.077(2) Uani 1 d . . 
H29 H 0.1090(7) 0.5213(3) 0.8568(4) 0.092 Uiso 1 calc R . 
C30 C 0.1541(6) 0.4285(3) 0.8585(4) 0.062(2) Uani 1 d . . 
H30 H 0.2031(6) 0.4315(3) 0.8976(4) 0.074 Uiso 1 calc R . 
C31 C 0.1951(5) 0.3215(3) 0.5595(3) 0.0433(14) Uani 1 d . . 
H31 H 0.1558(5) 0.2943(3) 0.5285(3) 0.052 Uiso 1 calc R . 
C32 C 0.2162(6) 0.3823(3) 0.5412(3) 0.060(2) Uani 1 d . . 
H32 H 0.1927(6) 0.3967(3) 0.4979(3) 0.072 Uiso 1 calc R . 
C33 C 0.2722(6) 0.4231(3) 0.5863(3) 0.057(2) Uani 1 d . . 
H33 H 0.2865(6) 0.4655(3) 0.5742(3) 0.069 Uiso 1 calc R . 
C34 C 0.3073(5) 0.4011(3) 0.6496(3) 0.0449(14) Uani 1 d . . 
H34 H 0.3451(5) 0.4287(3) 0.6809(3) 0.054 Uiso 1 calc R . 
C35 C 0.2864(4) 0.3378(2) 0.6668(3) 0.0344(12) Uani 1 d . . 
C36 C 0.3980(4) 0.3305(2) 0.7722(3) 0.0360(13) Uani 1 d . . 
C37 C 0.5057(4) 0.3520(3) 0.7529(3) 0.0409(13) Uani 1 d . . 
H37 H 0.5183(4) 0.3587(3) 0.7070(3) 0.049 Uiso 1 calc R . 
C38 C 0.5938(5) 0.3635(3) 0.8005(3) 0.051(2) Uani 1 d . . 
H38 H 0.6663(5) 0.3787(3) 0.7876(3) 0.061 Uiso 1 calc R . 
C39 C 0.5748(5) 0.3523(3) 0.8681(3) 0.052(2) Uani 1 d . . 
H39 H 0.6347(5) 0.3590(3) 0.9013(3) 0.063 Uiso 1 calc R . 
C40 C 0.4681(5) 0.3314(3) 0.8855(3) 0.0468(14) Uani 1 d . . 
H40 H 0.4557(5) 0.3237(3) 0.9312(3) 0.056 Uiso 1 calc R . 
B B 0.2766(7) -0.0082(4) 0.1419(5) 0.068(2) Uani 1 d . . 
F2 F 0.3043(5) -0.0572(3) 0.1831(4) 0.139(2) Uani 1 d . . 
F3 F 0.1907(5) -0.0284(3) 0.0971(3) 0.113(2) Uani 1 d . . 
F4 F 0.2341(5) 0.0421(3) 0.1752(3) 0.106(2) Uani 1 d . . 
F5 F 0.3719(5) 0.0116(3) 0.1102(3) 0.121(2) Uani 1 d . . 
C41 C 0.0698(9) 0.0966(4) 1.0393(4) 0.097(3) Uani 1 d . . 
H41B H 0.1462(9) 0.0884(4) 1.0616(4) 0.117 Uiso 1 calc R . 
H41A H 0.0137(9) 0.0678(4) 1.0590(4) 0.117 Uiso 1 calc R . 
Cl3 Cl 0.0291(2) 0.17593(9) 1.05563(9) 0.0670(5) Uani 1 d . . 
Cl4 Cl 0.0763(3) 0.07951(11) 0.95534(12) 0.1064(8) Uani 1 d . . 
C42 C 0.0748(13) -0.0100(9) 0.4959(7) 0.094(5) Uiso 0.70(3) d P . 
C43 C 0.2007(11) -0.0549(6) 0.4525(7) 0.108(6) Uiso 0.85(3) d P . 
C44 C 0.3033(19) 0.0041(11) 0.4475(10) 0.138(11) Uiso 0.80(6) d P . 
C45 C 0.4053(16) 0.0314(7) 0.4846(7) 0.100(7) Uiso 0.70(4) d P . 
C46 C 0.2712(10) 0.0042(5) 0.3709(5) 0.069(4) Uiso 0.83(4) d P . 
C47 C 0.3427(18) 0.0515(11) 0.4225(11) 0.097(10) Uiso 0.49(3) d P . 
C48 C 0.2248(19) -0.0218(11) 0.3881(10) 0.076(9) Uiso 0.47(4) d P . 
C49 C 0.3198(25) 0.0464(12) 0.4865(13) 0.104(12) Uiso 0.48(5) d P . 
C50 C 0.1089(17) -0.0456(11) 0.4947(9) 0.073(8) Uiso 0.44(3) d P . 
C51 C 0.2043(47) 0.0086(23) 0.4526(23) 0.099(22) Uiso 0.23(4) d P . 
 
loop_ 
 _atom_site_aniso_label 
 _atom_site_aniso_U_11 
 _atom_site_aniso_U_22 
 _atom_site_aniso_U_33 
 _atom_site_aniso_U_23 
 _atom_site_aniso_U_13 
 _atom_site_aniso_U_12 
Cr1 0.0316(5) 0.0343(5) 0.0272(5) -0.0008(4) -0.0010(3) -0.0001(3) 
Cr3 0.0410(5) 0.0379(5) 0.0313(5) -0.0084(4) 0.0000(4) 0.0028(4) 
Cr2A 0.0322(10) 0.031(2) 0.025(2) 0.0055(12) 0.0007(13) 0.0027(12) 
Cl1A 0.0427(14) 0.059(2) 0.022(2) -0.004(2) 0.0023(14) -0.0086(13) 
F1A 0.066(4) 0.057(6) 0.022(4) -0.009(3) -0.005(3) -0.003(4) 
Cr2B 0.030(2) 0.026(4) 0.024(5) 0.000(2) 0.001(3) 0.002(3) 
F1B 0.070(11) 0.057(12) 0.018(12) -0.018(8) 0.007(9) -0.001(8) 
Cl1B 0.051(3) 0.039(5) 0.016(4) -0.011(3) -0.005(3) 0.001(3) 
N1 0.036(2) 0.033(2) 0.025(2) -0.003(2) 0.002(2) -0.001(2) 
N2 0.039(2) 0.034(2) 0.019(2) 0.000(2) 0.000(2) 0.005(2) 
N3 0.044(3) 0.045(3) 0.025(2) 0.001(2) -0.002(2) 0.004(2) 
N4 0.035(2) 0.041(3) 0.029(2) -0.001(2) -0.001(2) 0.000(2) 
N5 0.041(2) 0.038(2) 0.022(2) 0.000(2) 0.003(2) 0.001(2) 
N6 0.044(3) 0.045(3) 0.024(2) 0.000(2) 0.003(2) 0.001(2) 
N7 0.037(2) 0.039(2) 0.028(2) 0.010(2) 0.000(2) 0.000(2) 
N8 0.041(3) 0.039(3) 0.028(2) -0.002(2) 0.001(2) 0.008(2) 
N9 0.046(3) 0.046(3) 0.044(3) -0.010(2) 0.007(2) -0.002(2) 
N10 0.034(2) 0.042(3) 0.031(2) 0.008(2) 0.003(2) 0.005(2) 
N11 0.040(2) 0.034(2) 0.025(2) -0.001(2) -0.003(2) 0.002(2) 
N12 0.043(3) 0.038(2) 0.032(3) -0.006(2) -0.009(2) 0.004(2) 
C1 0.041(3) 0.053(3) 0.026(3) -0.003(2) 0.004(2) -0.003(3) 
C2 0.045(3) 0.056(4) 0.041(3) 0.004(3) 0.014(3) 0.002(3) 
C3 0.032(3) 0.051(4) 0.051(4) 0.007(3) 0.006(3) 0.001(3) 
C4 0.038(3) 0.040(3) 0.041(3) 0.006(3) -0.004(2) -0.005(2) 
C5 0.037(3) 0.027(3) 0.031(3) 0.000(2) 0.004(2) -0.003(2) 
C6 0.037(3) 0.040(3) 0.028(3) 0.004(2) -0.006(2) 0.000(2) 
C7 0.050(3) 0.042(3) 0.037(3) 0.006(3) 0.003(3) 0.011(3) 
C8 0.057(4) 0.054(4) 0.042(4) 0.011(3) -0.001(3) 0.009(3) 
C9 0.066(4) 0.074(5) 0.033(3) 0.015(3) -0.006(3) 0.007(4) 
C10 0.055(4) 0.058(4) 0.025(3) 0.000(3) -0.003(3) 0.004(3) 
C11 0.052(3) 0.040(3) 0.041(3) -0.008(3) 0.004(3) 0.000(3) 
C12 0.068(4) 0.037(3) 0.058(4) -0.010(3) 0.005(3) -0.004(3) 
C13 0.060(4) 0.042(3) 0.044(4) 0.003(3) 0.006(3) -0.003(3) 
C14 0.045(3) 0.041(3) 0.036(3) 0.003(3) 0.004(2) 0.002(3) 
C15 0.036(3) 0.043(3) 0.024(3) 0.001(2) -0.005(2) 0.003(2) 
C16 0.040(3) 0.039(3) 0.025(3) 0.006(2) 0.004(2) 0.002(2) 
C17 0.044(3) 0.046(3) 0.030(3) 0.001(2) 0.008(2) -0.001(3) 
C18 0.038(3) 0.071(4) 0.041(3) 0.005(3) 0.006(3) 0.002(3) 
C19 0.052(4) 0.078(5) 0.034(3) 0.002(3) 0.010(3) 0.012(3) 
C20 0.051(4) 0.059(4) 0.030(3) -0.005(3) 0.007(3) 0.008(3) 
C21 0.041(3) 0.059(4) 0.023(3) 0.013(3) -0.005(2) -0.011(3) 
C22 0.038(3) 0.084(5) 0.033(3) 0.013(3) -0.006(3) -0.010(3) 
C23 0.034(3) 0.086(5) 0.052(4) 0.015(4) -0.001(3) 0.010(3) 
C24 0.044(3) 0.065(4) 0.045(4) 0.006(3) 0.003(3) 0.014(3) 
C25 0.040(3) 0.041(3) 0.029(3) 0.011(2) 0.000(2) 0.003(2) 
C26 0.041(3) 0.037(3) 0.041(3) 0.000(3) 0.010(3) 0.007(2) 
C27 0.060(4) 0.045(4) 0.061(4) -0.002(3) 0.010(3) 0.014(3) 
C28 0.082(5) 0.050(4) 0.074(5) -0.001(4) 0.011(4) 0.014(4) 
C29 0.089(6) 0.042(4) 0.102(7) -0.024(4) 0.024(5) 0.004(4) 
C30 0.067(4) 0.051(4) 0.068(5) -0.027(4) 0.010(3) -0.002(3) 
C31 0.049(3) 0.052(4) 0.029(3) 0.008(3) 0.002(2) 0.004(3) 
C32 0.069(4) 0.060(4) 0.049(4) 0.026(3) -0.008(3) -0.001(3) 
C33 0.063(4) 0.043(4) 0.065(4) 0.028(3) -0.004(3) 0.000(3) 
C34 0.044(3) 0.037(3) 0.053(4) 0.005(3) -0.003(3) -0.001(3) 
C35 0.031(3) 0.036(3) 0.037(3) 0.005(2) 0.003(2) 0.002(2) 
C36 0.037(3) 0.027(3) 0.043(3) -0.009(2) -0.007(2) 0.006(2) 
C37 0.036(3) 0.039(3) 0.048(3) -0.004(3) -0.001(3) 0.005(2) 
C38 0.037(3) 0.053(4) 0.063(4) -0.003(3) -0.001(3) 0.003(3) 
C39 0.046(4) 0.058(4) 0.051(4) -0.007(3) -0.017(3) 0.003(3) 
C40 0.049(4) 0.049(4) 0.040(3) -0.009(3) -0.011(3) 0.006(3) 
B 0.048(5) 0.052(5) 0.101(7) 0.004(5) -0.006(5) -0.004(4) 
F2 0.121(5) 0.106(4) 0.185(6) 0.070(4) -0.040(4) 0.011(3) 
F3 0.103(4) 0.101(4) 0.130(5) 0.007(3) -0.043(3) -0.015(3) 
F4 0.101(4) 0.093(4) 0.126(4) -0.019(3) 0.020(3) 0.000(3) 
F5 0.095(4) 0.129(5) 0.141(5) 0.000(4) 0.040(3) -0.024(3) 
C41 0.119(7) 0.094(6) 0.083(6) 0.038(5) 0.044(5) 0.038(5) 
Cl3 0.0625(10) 0.0737(11) 0.0645(11) 0.0050(9) 0.0000(8) 0.0008(9) 
Cl4 0.163(2) 0.0782(14) 0.0738(14) -0.0104(11) -0.0387(15) 0.0099(15) 
 
loop_ 
 _geom_bond_atom_site_label_1 
 _geom_bond_atom_site_label_2 
 _geom_bond_distance 
 _geom_bond_site_symmetry_2 
 _geom_bond_publ_flag 
Cr1 F1B 1.90(2) . ? 
Cr1 Cr2A 2.039(5) . ? 
Cr1 N7 2.095(4) . ? 
Cr1 N1 2.095(4) . ? 
Cr1 N4 2.097(4) . ? 
Cr1 N10 2.105(4) . ? 
Cr1 Cl1A 2.413(4) . ? 
Cr1 Cr2B 2.481(9) . ? 
Cr3 F1A 1.886(8) . ? 
Cr3 Cr2B 2.066(9) . ? 
Cr3 N3 2.067(4) . ? 
Cr3 N9 2.078(5) . ? 
Cr3 N12 2.086(5) . ? 
Cr3 N6 2.092(5) . ? 
Cr3 Cl1B 2.381(8) . ? 
Cr3 Cr2A 2.507(4) . ? 
Cr2A N5 1.974(7) . ? 
Cr2A N2 1.982(7) . ? 
Cr2A N8 2.029(6) . ? 
Cr2A N11 2.041(6) . ? 
Cr2B N11 1.917(13) . ? 
Cr2B N8 1.939(13) . ? 
Cr2B N2 2.075(13) . ? 
Cr2B N5 2.099(13) . ? 
N1 C1 1.351(6) . ? 
N1 C5 1.376(6) . ? 
N2 C5 1.373(6) . ? 
N2 C6 1.390(6) . ? 
N3 C10 1.360(7) . ? 
N3 C6 1.368(7) . ? 
N4 C11 1.364(7) . ? 
N4 C15 1.367(7) . ? 
N5 C15 1.379(7) . ? 
N5 C16 1.385(6) . ? 
N6 C20 1.354(7) . ? 
N6 C16 1.360(7) . ? 
N7 C21 1.349(7) . ? 
N7 C25 1.363(7) . ? 
N8 C26 1.367(7) . ? 
N8 C25 1.385(7) . ? 
N9 C30 1.363(8) . ? 
N9 C26 1.371(7) . ? 
N10 C35 1.365(7) . ? 
N10 C31 1.372(7) . ? 
N11 C36 1.370(6) . ? 
N11 C35 1.372(6) . ? 
N12 C40 1.357(7) . ? 
N12 C36 1.376(7) . ? 
C1 C2 1.367(8) . ? 
C2 C3 1.401(8) . ? 
C3 C4 1.374(8) . ? 
C4 C5 1.402(7) . ? 
C6 C7 1.403(7) . ? 
C7 C8 1.369(8) . ? 
C8 C9 1.388(9) . ? 
C9 C10 1.367(9) . ? 
C11 C12 1.359(8) . ? 
C12 C13 1.398(9) . ? 
C13 C14 1.362(8) . ? 
C14 C15 1.389(8) . ? 
C16 C17 1.395(8) . ? 
C17 C18 1.368(8) . ? 
C18 C19 1.390(9) . ? 
C19 C20 1.362(9) . ? 
C21 C22 1.364(8) . ? 
C22 C23 1.358(9) . ? 
C23 C24 1.384(9) . ? 
C24 C25 1.384(8) . ? 
C26 C27 1.395(8) . ? 
C27 C28 1.356(9) . ? 
C28 C29 1.376(11) . ? 
C29 C30 1.371(10) . ? 
C31 C32 1.352(9) . ? 
C32 C33 1.375(9) . ? 
C33 C34 1.379(8) . ? 
C34 C35 1.396(8) . ? 
C36 C37 1.390(8) . ? 
C37 C38 1.374(8) . ? 
C38 C39 1.391(9) . ? 
C39 C40 1.363(9) . ? 
B F2 1.343(10) . ? 
B F4 1.349(10) . ? 
B F5 1.355(10) . ? 
B F3 1.365(10) . ? 
C41 Cl4 1.710(9) . ? 
C41 Cl3 1.763(9) . ? 
C42 C50 0.84(2) . ? 
C42 C42 1.79(3) 3_556 ? 
C42 C51 1.80(5) . ? 
C42 C43 1.96(2) . ? 
C43 C51 1.33(5) . ? 
C43 C50 1.39(2) . ? 
C43 C48 1.49(3) . ? 
C43 C44 1.72(3) . ? 
C44 C51 1.15(5) . ? 
C44 C49 1.19(3) . ? 
C44 C47 1.21(2) . ? 
C44 C45 1.47(3) . ? 
C44 C46 1.55(2) . ? 
C44 C48 1.55(3) . ? 
C45 C49 1.03(2) . ? 
C45 C47 1.46(3) . ? 
C46 C48 0.85(2) . ? 
C46 C47 1.62(2) . ? 
C46 C51 1.83(5) . ? 
C47 C49 1.31(3) . ? 
C47 C51 1.95(6) . ? 
C48 C51 1.46(5) . ? 
C49 C51 1.66(6) . ? 
C50 C51 1.81(5) . ? 
 
loop_ 
 _geom_angle_atom_site_label_1 
 _geom_angle_atom_site_label_2 
 _geom_angle_atom_site_label_3 
 _geom_angle 
 _geom_angle_site_symmetry_1 
 _geom_angle_site_symmetry_3 
 _geom_angle_publ_flag 
F1B Cr1 N7 93.2(8) . . ? 
Cr2A Cr1 N7 87.3(2) . . ? 
F1B Cr1 N1 92.8(8) . . ? 
Cr2A Cr1 N1 86.6(2) . . ? 
N7 Cr1 N1 173.9(2) . . ? 
F1B Cr1 N4 96.6(8) . . ? 
Cr2A Cr1 N4 85.4(2) . . ? 
N7 Cr1 N4 87.0(2) . . ? 
N1 Cr1 N4 91.7(2) . . ? 
F1B Cr1 N10 89.2(8) . . ? 
Cr2A Cr1 N10 88.8(2) . . ? 
N7 Cr1 N10 88.9(2) . . ? 
N1 Cr1 N10 91.7(2) . . ? 
N4 Cr1 N10 173.1(2) . . ? 
Cr2A Cr1 Cl1A 178.1(2) . . ? 
N7 Cr1 Cl1A 92.5(2) . . ? 
N1 Cr1 Cl1A 93.5(2) . . ? 
N4 Cr1 Cl1A 92.6(2) . . ? 
N10 Cr1 Cl1A 93.1(2) . . ? 
F1B Cr1 Cr2B 174.1(9) . . ? 
N7 Cr1 Cr2B 86.5(3) . . ? 
N1 Cr1 Cr2B 87.5(3) . . ? 
N4 Cr1 Cr2B 89.3(3) . . ? 
N10 Cr1 Cr2B 84.9(3) . . ? 
F1A Cr3 N3 91.7(3) . . ? 
Cr2B Cr3 N3 89.3(4) . . ? 
F1A Cr3 N9 95.2(3) . . ? 
Cr2B Cr3 N9 83.8(4) . . ? 
N3 Cr3 N9 172.9(2) . . ? 
F1A Cr3 N12 95.8(3) . . ? 
Cr2B Cr3 N12 84.6(4) . . ? 
N3 Cr3 N12 87.6(2) . . ? 
N9 Cr3 N12 89.8(2) . . ? 
F1A Cr3 N6 93.3(3) . . ? 
Cr2B Cr3 N6 86.3(4) . . ? 
N3 Cr3 N6 93.9(2) . . ? 
N9 Cr3 N6 87.6(2) . . ? 
N12 Cr3 N6 170.8(2) . . ? 
Cr2B Cr3 Cl1B 171.2(4) . . ? 
N3 Cr3 Cl1B 98.7(3) . . ? 
N9 Cr3 Cl1B 88.0(3) . . ? 
N12 Cr3 Cl1B 92.1(3) . . ? 
N6 Cr3 Cl1B 96.6(3) . . ? 
F1A Cr3 Cr2A 176.6(3) . . ? 
N3 Cr3 Cr2A 85.9(2) . . ? 
N9 Cr3 Cr2A 87.3(2) . . ? 
N12 Cr3 Cr2A 86.6(2) . . ? 
N6 Cr3 Cr2A 84.4(2) . . ? 
N5 Cr2A N2 92.6(3) . . ? 
N5 Cr2A N8 88.9(3) . . ? 
N2 Cr2A N8 167.4(3) . . ? 
N5 Cr2A Cr1 98.0(2) . . ? 
N2 Cr2A Cr1 97.4(2) . . ? 
N8 Cr2A Cr1 94.7(2) . . ? 
N5 Cr2A N11 167.2(3) . . ? 
N2 Cr2A N11 90.0(3) . . ? 
N8 Cr2A N11 85.9(3) . . ? 
Cr1 Cr2A N11 94.1(2) . . ? 
N5 Cr2A Cr3 85.1(2) . . ? 
N2 Cr2A Cr3 84.7(2) . . ? 
N8 Cr2A Cr3 83.0(2) . . ? 
Cr1 Cr2A Cr3 176.2(3) . . ? 
N11 Cr2A Cr3 82.7(2) . . ? 
N11 Cr2B N8 92.0(6) . . ? 
N11 Cr2B Cr3 98.7(5) . . ? 
N8 Cr2B Cr3 98.1(5) . . ? 
N11 Cr2B N2 90.8(5) . . ? 
N8 Cr2B N2 166.3(5) . . ? 
Cr3 Cr2B N2 94.8(5) . . ? 
N11 Cr2B N5 166.8(5) . . ? 
N8 Cr2B N5 87.9(5) . . ? 
Cr3 Cr2B N5 94.4(5) . . ? 
N2 Cr2B N5 86.4(5) . . ? 
N11 Cr2B Cr1 84.5(4) . . ? 
N8 Cr2B Cr1 84.3(4) . . ? 
Cr3 Cr2B Cr1 175.9(6) . . ? 
N2 Cr2B Cr1 82.6(3) . . ? 
N5 Cr2B Cr1 82.3(3) . . ? 
C1 N1 C5 118.6(4) . . ? 
C1 N1 Cr1 121.6(3) . . ? 
C5 N1 Cr1 119.7(3) . . ? 
C5 N2 C6 122.5(4) . . ? 
C5 N2 Cr2A 113.7(3) . . ? 
C6 N2 Cr2A 123.7(4) . . ? 
C5 N2 Cr2B 121.8(4) . . ? 
C6 N2 Cr2B 114.4(4) . . ? 
C10 N3 C6 117.9(5) . . ? 
C10 N3 Cr3 120.9(4) . . ? 
C6 N3 Cr3 121.1(3) . . ? 
C11 N4 C15 118.8(5) . . ? 
C11 N4 Cr1 121.2(4) . . ? 
C15 N4 Cr1 119.7(3) . . ? 
C15 N5 C16 122.5(4) . . ? 
C15 N5 Cr2A 114.3(3) . . ? 
C16 N5 Cr2A 121.5(4) . . ? 
C15 N5 Cr2B 126.6(4) . . ? 
C16 N5 Cr2B 110.1(4) . . ? 
C20 N6 C16 118.1(5) . . ? 
C20 N6 Cr3 119.4(4) . . ? 
C16 N6 Cr3 121.8(3) . . ? 
C21 N7 C25 118.1(5) . . ? 
C21 N7 Cr1 122.2(4) . . ? 
C25 N7 Cr1 119.4(3) . . ? 
C26 N8 C25 122.0(4) . . ? 
C26 N8 Cr2B 112.6(4) . . ? 
C25 N8 Cr2B 125.2(4) . . ? 
C26 N8 Cr2A 125.4(4) . . ? 
C25 N8 Cr2A 112.7(4) . . ? 
C30 N9 C26 118.4(5) . . ? 
C30 N9 Cr3 121.4(4) . . ? 
C26 N9 Cr3 120.2(4) . . ? 
C35 N10 C31 118.6(5) . . ? 
C35 N10 Cr1 118.5(3) . . ? 
C31 N10 Cr1 122.2(4) . . ? 
C36 N11 C35 122.7(4) . . ? 
C36 N11 Cr2B 114.2(5) . . ? 
C35 N11 Cr2B 122.3(5) . . ? 
C36 N11 Cr2A 123.4(4) . . ? 
C35 N11 Cr2A 113.9(3) . . ? 
C40 N12 C36 118.8(5) . . ? 
C40 N12 Cr3 121.4(4) . . ? 
C36 N12 Cr3 119.7(3) . . ? 
N1 C1 C2 124.0(5) . . ? 
C1 C2 C3 118.0(5) . . ? 
C4 C3 C2 119.2(5) . . ? 
C3 C4 C5 120.7(5) . . ? 
N2 C5 N1 113.8(4) . . ? 
N2 C5 C4 126.6(5) . . ? 
N1 C5 C4 119.6(4) . . ? 
N3 C6 N2 114.2(4) . . ? 
N3 C6 C7 120.4(5) . . ? 
N2 C6 C7 125.3(5) . . ? 
C8 C7 C6 120.0(5) . . ? 
C7 C8 C9 119.7(6) . . ? 
C10 C9 C8 118.2(5) . . ? 
N3 C10 C9 123.7(6) . . ? 
C12 C11 N4 122.5(5) . . ? 
C11 C12 C13 118.7(6) . . ? 
C14 C13 C12 119.5(6) . . ? 
C13 C14 C15 120.4(5) . . ? 
N4 C15 N5 113.6(4) . . ? 
N4 C15 C14 120.1(5) . . ? 
N5 C15 C14 126.2(5) . . ? 
N6 C16 N5 113.3(4) . . ? 
N6 C16 C17 120.5(5) . . ? 
N5 C16 C17 126.0(5) . . ? 
C18 C17 C16 119.9(5) . . ? 
C17 C18 C19 119.7(6) . . ? 
C20 C19 C18 117.9(6) . . ? 
N6 C20 C19 123.8(6) . . ? 
N7 C21 C22 122.8(6) . . ? 
C23 C22 C21 119.5(6) . . ? 
C22 C23 C24 119.2(6) . . ? 
C25 C24 C23 119.6(6) . . ? 
N7 C25 C24 120.7(5) . . ? 
N7 C25 N8 113.4(4) . . ? 
C24 C25 N8 125.6(5) . . ? 
N8 C26 N9 114.0(5) . . ? 
N8 C26 C27 125.7(5) . . ? 
N9 C26 C27 120.2(5) . . ? 
C28 C27 C26 120.5(7) . . ? 
C27 C28 C29 119.3(7) . . ? 
C30 C29 C28 119.8(7) . . ? 
N9 C30 C29 121.8(7) . . ? 
C32 C31 N10 122.3(6) . . ? 
C31 C32 C33 119.7(6) . . ? 
C32 C33 C34 119.5(6) . . ? 
C33 C34 C35 119.6(6) . . ? 
N10 C35 N11 113.9(4) . . ? 
N10 C35 C34 120.3(5) . . ? 
N11 C35 C34 125.5(5) . . ? 
N11 C36 N12 114.1(5) . . ? 
N11 C36 C37 125.7(5) . . ? 
N12 C36 C37 119.9(5) . . ? 
C38 C37 C36 120.3(6) . . ? 
C37 C38 C39 119.4(6) . . ? 
C40 C39 C38 118.9(5) . . ? 
N12 C40 C39 122.6(6) . . ? 
F2 B F4 112.4(9) . . ? 
F2 B F5 110.2(7) . . ? 
F4 B F5 108.0(7) . . ? 
F2 B F3 107.6(7) . . ? 
F4 B F3 107.1(7) . . ? 
F5 B F3 111.6(8) . . ? 
Cl4 C41 Cl3 113.7(4) . . ? 
C50 C42 C42 131.4(24) . 3_556 ? 
C50 C42 C51 77.5(24) . . ? 
C42 C42 C51 144.7(22) 3_556 . ? 
C50 C42 C43 37.8(16) . . ? 
C42 C42 C43 152.7(14) 3_556 . ? 
C51 C42 C43 41.3(15) . . ? 
C51 C43 C50 83.3(25) . . ? 
C51 C43 C48 62.0(21) . . ? 
C50 C43 C48 128.9(15) . . ? 
C51 C43 C44 42.1(21) . . ? 
C50 C43 C44 118.5(14) . . ? 
C48 C43 C44 57.2(11) . . ? 
C51 C43 C42 62.8(24) . . ? 
C50 C43 C42 21.8(9) . . ? 
C48 C43 C42 109.0(11) . . ? 
C44 C43 C42 101.7(11) . . ? 
C51 C44 C49 90.4(31) . . ? 
C51 C44 C47 111.2(32) . . ? 
C49 C44 C47 66.6(18) . . ? 
C51 C44 C45 133.7(30) . . ? 
C49 C44 C45 44.2(14) . . ? 
C47 C44 C45 65.2(15) . . ? 
C51 C44 C46 84.2(26) . . ? 
C49 C44 C46 131.7(20) . . ? 
C47 C44 C46 70.9(15) . . ? 
C45 C44 C46 129.7(16) . . ? 
C51 C44 C48 63.5(26) . . ? 
C49 C44 C48 146.0(23) . . ? 
C47 C44 C48 101.2(19) . . ? 
C45 C44 C48 160.1(19) . . ? 
C46 C44 C48 31.8(8) . . ? 
C51 C44 C43 50.9(25) . . ? 
C49 C44 C43 126.1(20) . . ? 
C47 C44 C43 152.8(20) . . ? 
C45 C44 C43 141.7(15) . . ? 
C46 C44 C43 85.7(12) . . ? 
C48 C44 C43 54.1(13) . . ? 
C49 C45 C47 60.8(17) . . ? 
C49 C45 C44 53.2(16) . . ? 
C47 C45 C44 48.7(11) . . ? 
C48 C46 C44 74.2(17) . . ? 
C48 C46 C47 116.6(18) . . ? 
C44 C46 C47 44.7(10) . . ? 
C48 C46 C51 51.3(20) . . ? 
C44 C46 C51 38.7(15) . . ? 
C47 C46 C51 68.3(18) . . ? 
C44 C47 C49 56.0(15) . . ? 
C44 C47 C45 66.2(15) . . ? 
C49 C47 C45 43.4(13) . . ? 
C44 C47 C46 64.4(15) . . ? 
C49 C47 C46 116.3(19) . . ? 
C45 C47 C46 124.9(17) . . ? 
C44 C47 C51 33.5(16) . . ? 
C49 C47 C51 57.4(19) . . ? 
C45 C47 C51 89.1(19) . . ? 
C46 C47 C51 61.0(16) . . ? 
C46 C48 C51 101.8(27) . . ? 
C46 C48 C43 142.4(21) . . ? 
C51 C48 C43 53.7(19) . . ? 
C46 C48 C44 74.1(18) . . ? 
C51 C48 C44 44.9(19) . . ? 
C43 C48 C44 68.7(12) . . ? 
C45 C49 C44 82.6(23) . . ? 
C45 C49 C47 75.8(20) . . ? 
C44 C49 C47 57.4(16) . . ? 
C45 C49 C51 125.7(29) . . ? 
C44 C49 C51 43.9(18) . . ? 
C47 C49 C51 80.8(22) . . ? 
C42 C50 C43 120.4(24) . . ? 
C42 C50 C51 75.5(24) . . ? 
C43 C50 C51 46.9(17) . . ? 
C44 C51 C43 87.1(35) . . ? 
C44 C51 C48 71.6(29) . . ? 
C43 C51 C48 64.3(23) . . ? 
C44 C51 C49 45.6(22) . . ? 
C43 C51 C49 120.1(36) . . ? 
C48 C51 C49 113.8(35) . . ? 
C44 C51 C42 150.4(39) . . ? 
C43 C51 C42 76.0(25) . . ? 
C48 C51 C42 119.8(32) . . ? 
C49 C51 C42 125.1(29) . . ? 
C44 C51 C50 127.8(38) . . ? 
C43 C51 C50 49.8(19) . . ? 
C48 C51 C50 104.9(29) . . ? 
C49 C51 C50 127.0(29) . . ? 
C42 C51 C50 27.0(10) . . ? 
C44 C51 C46 57.1(23) . . ? 
C43 C51 C46 87.8(26) . . ? 
C48 C51 C46 26.9(13) . . ? 
C49 C51 C46 91.2(26) . . ? 
C42 C51 C46 143.7(29) . . ? 
C50 C51 C46 131.8(28) . . ? 
C44 C51 C47 35.3(20) . . ? 
C43 C51 C47 119.1(34) . . ? 
C48 C51 C47 76.3(25) . . ? 
C49 C51 C47 41.8(15) . . ? 
C42 C51 C47 162.8(30) . . ? 
C50 C51 C47 162.4(31) . . ? 
C46 C51 C47 50.7(15) . . ? 
 
loop_ 
 _geom_torsion_atom_site_label_1 
 _geom_torsion_atom_site_label_2 
 _geom_torsion_atom_site_label_3 
 _geom_torsion_atom_site_label_4 
 _geom_torsion 
 _geom_torsion_site_symmetry_1 
 _geom_torsion_site_symmetry_2 
 _geom_torsion_site_symmetry_3 
 _geom_torsion_site_symmetry_4 
 _geom_torsion_publ_flag 
 N1 Cr1 Cr3 N3 -44.0(2) . . . . ? 
 N4 Cr1 Cr3 N6 -46.3(2) . . . . ? 
 N7 Cr1 Cr3 N9 -47.1(2) . . . . ? 
 N10 Cr1 Cr3 N12 -48.1(2) . . . . ? 
 
_refine_diff_density_max    0.749 
_refine_diff_density_min   -0.651 
_refine_diff_density_rms    0.080 

#===END
